# Supplementary material for: Acute exercise rewires the proteomic landscape of human immune cells
Source: Research Square preprint supplement (doi:10.21203/rs.3.rs-6864249/v1), 2025-06-30
Supplement: Supplementary file 6 [file adb6836167490b1c7e5b46bc.xlsx]

## Sheet: GSEA overlap cluster 1-3
Cluster	Timepoint	ONTOLOGY	ID	Description	setSize	enrichmentScore	NES	pvalue	p.adjust	qvalue	rank	leading_edge	core_enrichment	annotated_proteins
Cluster 1	1h post exercise	BP	GO:0001775	cell activation	29	0.595059	1.9503	0.000175713	0.0037592	0.00314995	61	tags=55%, list=22%, signal=48%	CAMP, BST2, AZU1, BPI, MMP8, CD55, TLR1, MYH9, SIRPB1, DGKH, PDGFB, ANXA3, S100A12, CD300A, CD40, SLC7A1	ADAM10, ANXA3, AZU1, B2M, BPI, BST2, CAMP, CD40, CD55, IGBP1, ITGB1, ITGB3, LAMP1, CD46, MMP8, MYH9, P2RY1, PDGFB, PPP3CB, S100A12, SLC7A1, TLR1, SIRPB1, PRMT5, CD300A, METAP1, VSIR, TREML2, DGKH
Cluster 2	1h post exercise	BP	GO:0001775	cell activation	39	0.544832	2.22643	1.52193e-05	0.000794086	0.00064448	148	tags=69%, list=32%, signal=52%	CTSG, BST1, CD93, KRT2, CR1, SIRPA, SEMA4A, LRP1, PLSCR1, DYSF, ITGAM, FN1, TNFSF13, TGFB1, CD226, GP1BB, IL6ST, MDK, PLPP6, VWF, SOD1, PDGFA, NCSTN, F11R, HRG, CD47, SLC18A2	BRAF, BST1, CCND3, CD47, CR1, CTSG, FN1, GP1BB, HPRT1, HRG, IL6ST, ITGAM, KRT2, LRP1, MDK, PNP, PRDX1, PDGFA, PLSCR1, PPIA, PRKCB, SLC18A2, SOD1, ADAM17, TGFB1, TSC1, VWF, YES1, DYSF, TNFSF13, CD226, CD93, NCSTN, IL17RA, F11R, TOLLIP, SEMA4A, SIRPA, PLPP6
Cluster 3	Post exercise	BP	GO:0001775	cell activation	37	0.639836	1.73964	0.000280253	0.0437194	0.0416544	65	tags=54%, list=20%, signal=49%	TBX21, PRF1, CST7, FCGR3A, HLA-F, IL4I1, ZAP70, NLRC3, SH2D1B, RASSF5, STAT4, NFATC2, RUNX1, RUNX3, CD247, STAP1, RASAL3, TBC1D10C, TRGC1, CTSC	ATM, CASP8, RUNX2, RUNX1, RUNX3, CD247, CTSC, CX3CR1, FCGR3A, HLA-E, HLA-F, HSPD1, INPP5D, LCK, NFATC2, PHB1, PRF1, PKN1, RAC2, SMARCC2, STAT4, TRGC1, ZAP70, CST7, RAB29, SHPK, STAP1, LAT, STK39, TBX21, CYRIB, RASAL3, RASSF5, SH2D1B, NLRC3, IL4I1, TBC1D10C
Cluster 3	1h post exercise	BP	GO:0001775	cell activation	37	-0.631739	-2.49071	3.01058e-08	1.17413e-05	1.04895e-05	60	tags=57%, list=18%, signal=52%	RAC2, RASAL3, CST7, NLRC3, TBC1D10C, HLA-E, CX3CR1, PHB1, LCK, HLA-F, RUNX1, TRGC1, TBX21, CD247, ZAP70, FCGR3A, STAT4, SH2D1B, RUNX3, PRF1, STAP1	ATM, CASP8, RUNX2, RUNX1, RUNX3, CD247, CTSC, CX3CR1, FCGR3A, HLA-E, HLA-F, HSPD1, INPP5D, LCK, NFATC2, PHB1, PRF1, PKN1, RAC2, SMARCC2, STAT4, TRGC1, ZAP70, CST7, RAB29, SHPK, STAP1, LAT, STK39, TBX21, CYRIB, RASAL3, RASSF5, SH2D1B, NLRC3, IL4I1, TBC1D10C
Cluster 1	1h post exercise	BP	GO:0001906	cell killing	12	0.677983	1.96627	0.0022014	0.0277248	0.0232314	39	tags=50%, list=14%, signal=45%	DEFA3, LTF, CAMP, AZU1, CD55, S100A12	AZU1, B2M, C6, C7, CAMP, CD55, DEFA3, IGHG1, LAMP1, LTF, PPP3CB, S100A12
Cluster 2	1h post exercise	BP	GO:0001906	cell killing	15	0.614069	2.13591	0.000966438	0.0163709	0.0132866	85	tags=60%, list=18%, signal=51%	CTSG, ELANE, LYZ, CR1, ITGAM, FCGR1A, CFHR1, TGFB1, CD226	C3, C5, C8G, CR1, CTSG, ELANE, FCGR1A, CFHR1, HPRT1, HRG, ITGAM, LYZ, PRDX1, TGFB1, CD226
Cluster 3	1h post exercise	BP	GO:0001906	cell killing	19	-0.669028	-2.303	1.37392e-05	0.00153093	0.00136772	36	tags=53%, list=11%, signal=50%	HLA-E, CX3CR1, HLA-F, GZMA, FCGR3A, GZMM, GZMH, GZMB, PRF1, STAP1	CTSC, CX3CR1, FCGR3A, GAPDH, GBP1, GBP2, GBP3, GZMH, GZMA, GZMB, GZMM, HLA-E, HLA-F, SH2D1A, PRF1, TAP2, STAP1, CYRIB, GBP5
Cluster 1	1h post exercise	BP	GO:0009607	response to biotic stimulus	41	0.609342	2.08196	1.66848e-06	6.92911e-05	5.80611e-05	74	tags=59%, list=27%, signal=50%	DEFA3, MMP9, LTF, LCN2, CAMP, BST2, AZU1, BPI, MMP8, CFP, CD55, TLR1, CXCL2, RNASE3, ANXA3, S100A12, RAF1, CD300A, PTGIR, CD40, TF, VIL1, SERINC3, CFI	ANXA3, APCS, AZU1, B2M, BPI, BST2, C6, C7, CAMP, CD40, CDC42, CD55, DEFA3, CXCL2, CFI, IGHG1, LAMP1, LCN2, LGALS8, LTF, CD46, MMP8, MMP9, CFP, PTGIR, RAF1, UPF1, RNASE3, S100A12, PPP1R11, TF, TLR1, UFD1, VIL1, SLC7A5, PRDX3, SERINC3, CD300A, APPL1, UBQLN1, EPG5
Cluster 2	1h post exercise	BP	GO:0009607	response to biotic stimulus	68	0.467205	2.02249	4.68652e-05	0.00174651	0.00141747	109	tags=46%, list=23%, signal=41%	CTSG, PRTN3, ELANE, MPO, LYZ, CDA, S100A9, PADI4, CR1, SIRPA, S100A8, FCN1, PLSCR1, CFD, ITGAM, CD14, HP, CXCL3, RNASE2, FCGR1A, HPX, CFHR1, PLSCR3, TGFB1, CD226, CD36, TPT1, SERPINE1, HYAL3, F12, PLPP6	ADH5, ALAD, ARF1, C3, C4A, C5, C8G, CALR, CASP6, CD14, CD36, CD47, CDA, CNP, CR1, CTSG, CFD, ELANE, ENO1, F12, FCGR1A, FCN1, FUCA2, CXCL3, GSTP1, CFHR1, HP, HPX, HRG, ITGAM, LYZ, MPO, PRDX1, SERPINE1, PLSCR1, PPP2CA, MAPK1, PRTN3, PSMA2, RNASE2, S100A8, S100A9, ADAM17, TGFB1, TPT1, YES1, YWHAE, RAB7A, HYAL3, USP15, ZMPSTE24, CD226, NT5C2, ENDOD1, STAB1, PADI4, IL17RA, SLC17A5, IGKV3-20, TOLLIP, G…
Cluster 3	1h post exercise	BP	GO:0009607	response to biotic stimulus	59	-0.434322	-1.83624	0.000640385	0.0173006	0.0154561	139	tags=63%, list=42%, signal=44%	SLFN11, SHPK, RFTN1, GBP3, GAPDH, ERBIN, SAMHD1, STAT1, TXNIP, SAP30BP, MATR3, MX1, MECP2, IL4I1, HSPD1, GBP5, SH2D1A, SMPD1, PAK2, NLRC3, HLA-E, CX3CR1, PHB1, LCK, HLA-F, TBX21, FAU, PYHIN1, ZAP70, GZMA, FCGR3A, GZMM, SH2D1B, GZMB, PRF1, ABI3, STAP1	CAPN2, CASP8, CX3CR1, DDX3X, FAU, FCGR3A, GAPDH, GBP1, GBP2, GBP3, GZMA, GZMB, GZMM, HLA-E, HLA-F, HSPD1, LCK, SH2D1A, MECP2, MX1, NCBP1, PAK2, PCBP2, PHB1, PML, PRF1, RPS6KA3, SMPD1, STAT1, TAP2, WIPF1, ZAP70, RAB29, MATR3, RBM14, TXNIP, CDK19, TTLL12, RFTN1, SHPK, SAMHD1, STAP1, TBK1, SAP30BP, TBX21, ABI3, CYRIB, DDX60, LYAR, ERBIN, RNF213, GSDMD, TRAF3IP3, SLFN11, GBP5, SH2D1B, PYHIN1, NLRC3, …
Cluster 1	1h post exercise	BP	GO:0043207	response to external biotic stimulus	41	0.609342	2.08196	1.66848e-06	6.92911e-05	5.80611e-05	74	tags=59%, list=27%, signal=50%	DEFA3, MMP9, LTF, LCN2, CAMP, BST2, AZU1, BPI, MMP8, CFP, CD55, TLR1, CXCL2, RNASE3, ANXA3, S100A12, RAF1, CD300A, PTGIR, CD40, TF, VIL1, SERINC3, CFI	ANXA3, APCS, AZU1, B2M, BPI, BST2, C6, C7, CAMP, CD40, CDC42, CD55, DEFA3, CXCL2, CFI, IGHG1, LAMP1, LCN2, LGALS8, LTF, CD46, MMP8, MMP9, CFP, PTGIR, RAF1, UPF1, RNASE3, S100A12, PPP1R11, TF, TLR1, UFD1, VIL1, SLC7A5, PRDX3, SERINC3, CD300A, APPL1, UBQLN1, EPG5
Cluster 2	1h post exercise	BP	GO:0043207	response to external biotic stimulus	68	0.467205	2.02249	4.68652e-05	0.00174651	0.00141747	109	tags=46%, list=23%, signal=41%	CTSG, PRTN3, ELANE, MPO, LYZ, CDA, S100A9, PADI4, CR1, SIRPA, S100A8, FCN1, PLSCR1, CFD, ITGAM, CD14, HP, CXCL3, RNASE2, FCGR1A, HPX, CFHR1, PLSCR3, TGFB1, CD226, CD36, TPT1, SERPINE1, HYAL3, F12, PLPP6	ADH5, ALAD, ARF1, C3, C4A, C5, C8G, CALR, CASP6, CD14, CD36, CD47, CDA, CNP, CR1, CTSG, CFD, ELANE, ENO1, F12, FCGR1A, FCN1, FUCA2, CXCL3, GSTP1, CFHR1, HP, HPX, HRG, ITGAM, LYZ, MPO, PRDX1, SERPINE1, PLSCR1, PPP2CA, MAPK1, PRTN3, PSMA2, RNASE2, S100A8, S100A9, ADAM17, TGFB1, TPT1, YES1, YWHAE, RAB7A, HYAL3, USP15, ZMPSTE24, CD226, NT5C2, ENDOD1, STAB1, PADI4, IL17RA, SLC17A5, IGKV3-20, TOLLIP, G…
Cluster 3	1h post exercise	BP	GO:0043207	response to external biotic stimulus	56	-0.425479	-1.78871	0.00201309	0.0347798	0.0310718	36	tags=29%, list=11%, signal=31%	HLA-E, CX3CR1, PHB1, LCK, HLA-F, TBX21, FAU, PYHIN1, ZAP70, GZMA, FCGR3A, GZMM, SH2D1B, GZMB, PRF1, STAP1	CAPN2, CASP8, CX3CR1, DDX3X, FAU, FCGR3A, GAPDH, GBP1, GBP2, GBP3, GZMA, GZMB, GZMM, HLA-E, HLA-F, HSPD1, LCK, SH2D1A, MECP2, MX1, NCBP1, PAK2, PCBP2, PHB1, PML, PRF1, RPS6KA3, SMPD1, STAT1, TAP2, WIPF1, ZAP70, RAB29, MATR3, RBM14, CDK19, TTLL12, RFTN1, SHPK, SAMHD1, STAP1, TBK1, SAP30BP, TBX21, CYRIB, DDX60, LYAR, ERBIN, RNF213, GSDMD, TRAF3IP3, SLFN11, GBP5, SH2D1B, PYHIN1, NLRC3
Cluster 1	1h post exercise	BP	GO:0009605	response to external stimulus	69	0.517425	1.85538	4.34977e-05	0.00118113	0.000989705	74	tags=46%, list=27%, signal=45%	DEFA3, MMP9, LTF, LCN2, CAMP, BST2, AZU1, BPI, MMP8, RETN, CFP, CD55, TLR1, CXCL2, RNASE3, KRT5, PDGFB, ANXA3, S100A12, NT5E, RAF1, PLGRKT, CEP250, CD300A, PTGIR, CD40, PLD1, TF, VIL1, SERINC3, ALB, CFI	ADAM10, ALB, ANXA3, APCS, AZU1, B2M, BPI, BST2, C6, C7, CAMP, CASP2, CD40, CDC42, CD55, DDT, DEFA3, GNAI2, CXCL2, CFI, IGHG1, ITGB3, KCNA1, KRT5, LAMP1, LAMP2, LCN2, LGALS8, LTF, CD46, MMP8, MMP9, NT5E, P2RY1, PDGFB, CFP, PLD1, PPIB, PPP1CB, PPP1CC, PSMA6, PTGIR, RAF1, UPF1, RNASE3, S100A12, PPP1R11, TF, TLR1, UFD1, VIL1, SLC7A5, SEMA7A, DEPDC5, SEMA4D, PRDX3, SERINC3, WDR45, CEP250, CD300A, TMEM…
Cluster 2	1h post exercise	BP	GO:0009605	response to external stimulus	109	0.362788	1.64069	0.00249738	0.0300223	0.0243661	145	tags=44%, list=31%, signal=40%	CTSG, PRTN3, ELANE, BST1, MPO, LYZ, CDA, S100A9, PADI4, CR1, SIRPA, S100A8, FCN1, SEMA4A, PLSCR1, CFD, ITGAM, CD14, HP, CXCL3, RNASE2, THBS4, FCGR1A, HPX, CFHR1, ENG, PLSCR3, TGFB1, CD226, CD36, TPT1, IL6ST, SERPINE1, MDK, HYAL3, ITGAV, F12, PLPP6, ARSB, SOD1, ALAD, PDGFA, F11R, KLKB1, HRG, CHSY1, ENDOD1, CD47	ADH5, ALAD, ARF1, ARSB, BRAF, BSG, BST1, C3, C4A, C5, C8G, CALR, CASP6, CAT, CD14, CD36, CD47, CDA, CNP, CR1, CTSG, CFD, ELANE, ENG, ENO1, F12, ACSL1, FCGR1A, FCN1, FUCA2, GPI, CXCL3, GSTP1, CFHR1, HP, HPX, HRG, IL6ST, ITGA2, ITGAM, ITGAV, KLKB1, LYZ, MDK, MPO, PRDX1, SERPINE1, PDGFA, PLSCR1, PPIA, PPP2CA, PRKAA1, PRKCB, MAPK1, PROS1, PRTN3, PSMA1, PSMA2, RALA, RALB, RNASE2, S100A8, S100A9, ST6GA…
Cluster 3	1h post exercise	BP	GO:0009605	response to external stimulus	75	-0.386056	-1.6781	0.00310684	0.0484666	0.0432995	80	tags=37%, list=24%, signal=37%	HSPD1, GBP5, SH2D1A, SMPD1, GRK4, MBD3, RAC2, PAK2, CST7, NLRC3, HLA-E, CX3CR1, AKR1C3, PHB1, LCK, HLA-F, TBX21, FAU, PYHIN1, ZAP70, ACAT1, GZMA, FCGR3A, GZMM, SH2D1B, GZMB, PRF1, STAP1	ACAT1, ATM, CAPN2, CASP8, CTSC, CX3CR1, DDX3X, FAU, FCGR3A, GAPDH, GBP1, GBP2, GBP3, GRK4, GZMA, GZMB, GZMM, HLA-E, HLA-F, HSPD1, IL16, LCK, SH2D1A, MECP2, MX1, NCBP1, PAK2, PCBP2, PHB1, PML, PRF1, MAP2K2, RAC2, RPS6KA3, SMPD1, STAT1, TAP2, WIPF1, ZAP70, TUBA1A, CST7, YARS1, AKR1C3, TRADD, RAB29, MATR3, RBM14, TXNIP, AFG3L2, CDK19, TTLL12, RFTN1, UFL1, SHPK, PRKD2, SAMHD1, STAP1, STK39, TBK1, SAP…
Cluster 1	1h post exercise	BP	GO:0051707	response to other organism	41	0.609342	2.08196	1.66848e-06	6.92911e-05	5.80611e-05	74	tags=59%, list=27%, signal=50%	DEFA3, MMP9, LTF, LCN2, CAMP, BST2, AZU1, BPI, MMP8, CFP, CD55, TLR1, CXCL2, RNASE3, ANXA3, S100A12, RAF1, CD300A, PTGIR, CD40, TF, VIL1, SERINC3, CFI	ANXA3, APCS, AZU1, B2M, BPI, BST2, C6, C7, CAMP, CD40, CDC42, CD55, DEFA3, CXCL2, CFI, IGHG1, LAMP1, LCN2, LGALS8, LTF, CD46, MMP8, MMP9, CFP, PTGIR, RAF1, UPF1, RNASE3, S100A12, PPP1R11, TF, TLR1, UFD1, VIL1, SLC7A5, PRDX3, SERINC3, CD300A, APPL1, UBQLN1, EPG5
Cluster 2	1h post exercise	BP	GO:0051707	response to other organism	67	0.45596	1.97345	8.51689e-05	0.00257348	0.00208864	109	tags=45%, list=23%, signal=40%	CTSG, PRTN3, ELANE, MPO, LYZ, S100A9, PADI4, CR1, SIRPA, S100A8, FCN1, PLSCR1, CFD, ITGAM, CD14, HP, CXCL3, RNASE2, FCGR1A, HPX, CFHR1, PLSCR3, TGFB1, CD226, CD36, TPT1, SERPINE1, HYAL3, F12, PLPP6	ADH5, ALAD, ARF1, C3, C4A, C5, C8G, CALR, CASP6, CD14, CD36, CD47, CNP, CR1, CTSG, CFD, ELANE, ENO1, F12, FCGR1A, FCN1, FUCA2, CXCL3, GSTP1, CFHR1, HP, HPX, HRG, ITGAM, LYZ, MPO, PRDX1, SERPINE1, PLSCR1, PPP2CA, MAPK1, PRTN3, PSMA2, RNASE2, S100A8, S100A9, ADAM17, TGFB1, TPT1, YES1, YWHAE, RAB7A, HYAL3, USP15, ZMPSTE24, CD226, NT5C2, ENDOD1, STAB1, PADI4, IL17RA, SLC17A5, IGKV3-20, TOLLIP, GPR108…
Cluster 3	1h post exercise	BP	GO:0051707	response to other organism	56	-0.425479	-1.78871	0.00201309	0.0347798	0.0310718	36	tags=29%, list=11%, signal=31%	HLA-E, CX3CR1, PHB1, LCK, HLA-F, TBX21, FAU, PYHIN1, ZAP70, GZMA, FCGR3A, GZMM, SH2D1B, GZMB, PRF1, STAP1	CAPN2, CASP8, CX3CR1, DDX3X, FAU, FCGR3A, GAPDH, GBP1, GBP2, GBP3, GZMA, GZMB, GZMM, HLA-E, HLA-F, HSPD1, LCK, SH2D1A, MECP2, MX1, NCBP1, PAK2, PCBP2, PHB1, PML, PRF1, RPS6KA3, SMPD1, STAT1, TAP2, WIPF1, ZAP70, RAB29, MATR3, RBM14, CDK19, TTLL12, RFTN1, SHPK, SAMHD1, STAP1, TBK1, SAP30BP, TBX21, CYRIB, DDX60, LYAR, ERBIN, RNF213, GSDMD, TRAF3IP3, SLFN11, GBP5, SH2D1B, PYHIN1, NLRC3
Cluster 1	1h post exercise	BP	GO:0045321	leukocyte activation	23	0.628779	2.00339	0.00016211	0.00357655	0.0029969	61	tags=61%, list=22%, signal=52%	CAMP, BST2, AZU1, BPI, MMP8, CD55, TLR1, MYH9, SIRPB1, ANXA3, S100A12, CD300A, CD40, SLC7A1	ADAM10, ANXA3, AZU1, B2M, BPI, BST2, CAMP, CD40, CD55, IGBP1, ITGB1, LAMP1, CD46, MMP8, MYH9, PPP3CB, S100A12, SLC7A1, TLR1, SIRPB1, CD300A, VSIR, TREML2
Cluster 2	1h post exercise	BP	GO:0045321	leukocyte activation	30	0.531332	2.09195	0.000211989	0.00504264	0.0040926	148	tags=67%, list=32%, signal=49%	CTSG, BST1, CD93, CR1, SIRPA, SEMA4A, PLSCR1, DYSF, ITGAM, FN1, TNFSF13, TGFB1, CD226, IL6ST, MDK, PLPP6, SOD1, NCSTN, CD47, SLC18A2	BRAF, BST1, CCND3, CD47, CR1, CTSG, FN1, HPRT1, IL6ST, ITGAM, MDK, PNP, PRDX1, PLSCR1, PRKCB, SLC18A2, SOD1, ADAM17, TGFB1, TSC1, YES1, DYSF, TNFSF13, CD226, CD93, NCSTN, TOLLIP, SEMA4A, SIRPA, PLPP6
Cluster 3	Post exercise	BP	GO:0045321	leukocyte activation	37	0.639836	1.73964	0.000280253	0.0437194	0.0416544	65	tags=54%, list=20%, signal=49%	TBX21, PRF1, CST7, FCGR3A, HLA-F, IL4I1, ZAP70, NLRC3, SH2D1B, RASSF5, STAT4, NFATC2, RUNX1, RUNX3, CD247, STAP1, RASAL3, TBC1D10C, TRGC1, CTSC	ATM, CASP8, RUNX2, RUNX1, RUNX3, CD247, CTSC, CX3CR1, FCGR3A, HLA-E, HLA-F, HSPD1, INPP5D, LCK, NFATC2, PHB1, PRF1, PKN1, RAC2, SMARCC2, STAT4, TRGC1, ZAP70, CST7, RAB29, SHPK, STAP1, LAT, STK39, TBX21, CYRIB, RASAL3, RASSF5, SH2D1B, NLRC3, IL4I1, TBC1D10C
Cluster 3	1h post exercise	BP	GO:0045321	leukocyte activation	37	-0.631739	-2.49071	3.01058e-08	1.17413e-05	1.04895e-05	60	tags=57%, list=18%, signal=52%	RAC2, RASAL3, CST7, NLRC3, TBC1D10C, HLA-E, CX3CR1, PHB1, LCK, HLA-F, RUNX1, TRGC1, TBX21, CD247, ZAP70, FCGR3A, STAT4, SH2D1B, RUNX3, PRF1, STAP1	ATM, CASP8, RUNX2, RUNX1, RUNX3, CD247, CTSC, CX3CR1, FCGR3A, HLA-E, HLA-F, HSPD1, INPP5D, LCK, NFATC2, PHB1, PRF1, PKN1, RAC2, SMARCC2, STAT4, TRGC1, ZAP70, CST7, RAB29, SHPK, STAP1, LAT, STK39, TBX21, CYRIB, RASAL3, RASSF5, SH2D1B, NLRC3, IL4I1, TBC1D10C
Cluster 1	1h post exercise	BP	GO:0006955	immune response	44	0.511383	1.76585	0.00116892	0.0165052	0.0138302	81	tags=52%, list=29%, signal=44%	DEFA3, LTF, LCN2, CAMP, BST2, AZU1, BPI, CFP, CD55, TLR1, CXCL2, RNASE3, ANXA3, S100A12, RAF1, CD300A, CD40, ALCAM, TF, SERINC3, CFI, SEMA7A, PKHD1L1	ALCAM, AMBP, ANXA3, APCS, AZU1, B2M, BPI, BST2, C6, C7, CAMP, CD40, CDC42, CD55, DEFA3, FTH1, GRB2, CXCL2, CFI, IGHG1, LAMP1, LCN2, LTF, CD46, CFP, PPP3CB, RAF1, RNASE3, S100A12, TF, TLR1, UFD1, SLC7A5, SEMA7A, SEMA4D, SERINC3, CD300A, APPL1, UBQLN1, WDR41, EPG5, VSIR, PKHD1L1, IGLL5
Cluster 2	Post exercise	BP	GO:0006955	immune response	74	-0.527689	-1.62819	8.29128e-05	0.0144247	0.0135541	95	tags=39%, list=20%, signal=37%	IGKC, CARD9, IL6ST, TGFB1, SLC18A2, CTSG, C3, MDK, PLSCR1, LILRA3, HRG, S100A9, ST6GAL1, RNASE2, CD14, CR1, PRTN3, AZGP1, F12, DYSF, PLPP6, LYZ, CFD, FCGRT, LRP1, SIRPA, FCN1, PADI4, FCGR1A	AZGP1, BRAF, BST1, C3, C4A, C5, C8G, CASP6, CD14, CD36, CD47, CR1, CTSG, CFD, ECM1, ELANE, F12, FCGR1A, FCGRT, FCN1, GPI, CXCL3, CFHR1, HPRT1, HPX, HRG, IGKC, IGLC2, IL6ST, INPPL1, ITGAM, LRP1, LYZ, MDK, PNP, PRDX1, PECAM1, PLSCR1, PPP2CA, PRKCB, MAPK1, PRTN3, PSMA1, RNASE2, S100A8, S100A9, ST6GAL1, SLC18A2, ADAM17, TGFB1, TSC1, YES1, YWHAE, DYSF, TNFSF13, USP15, CERT1, CD226, LILRA3, ENDOD1, PAD…
Cluster 2	1h post exercise	BP	GO:0006955	immune response	74	0.490101	2.15203	9.83985e-07	0.000115749	9.39418e-05	96	tags=45%, list=21%, signal=42%	CTSG, PRTN3, ELANE, BST1, LILRA3, LYZ, S100A9, PADI4, CR1, AZGP1, SIRPA, S100A8, FCN1, SEMA4A, LRP1, PLSCR1, FCGRT, CFD, DYSF, ITGAM, CD14, ECM1, CXCL3, RNASE2, FCGR1A, HPX, TNFSF13, CFHR1, TGFB1, CD226, CD36, IL6ST, MDK	AZGP1, BRAF, BST1, C3, C4A, C5, C8G, CASP6, CD14, CD36, CD47, CR1, CTSG, CFD, ECM1, ELANE, F12, FCGR1A, FCGRT, FCN1, GPI, CXCL3, CFHR1, HPRT1, HPX, HRG, IGKC, IGLC2, IL6ST, INPPL1, ITGAM, LRP1, LYZ, MDK, PNP, PRDX1, PECAM1, PLSCR1, PPP2CA, PRKCB, MAPK1, PRTN3, PSMA1, RNASE2, S100A8, S100A9, ST6GAL1, SLC18A2, ADAM17, TGFB1, TSC1, YES1, YWHAE, DYSF, TNFSF13, USP15, CERT1, CD226, LILRA3, ENDOD1, PAD…
Cluster 3	1h post exercise	BP	GO:0006955	immune response	64	-0.461295	-1.9683	6.07101e-05	0.0036426	0.00325426	84	tags=45%, list=25%, signal=42%	IL4I1, HSPD1, GBP5, SH2D1A, SMPD1, RAC2, PAK2, CST7, NLRC3, ITGB7, HLA-E, CX3CR1, PHB1, LCK, HLA-F, TRGC1, TBX21, CD247, FAU, PYHIN1, ZAP70, GZMA, FCGR3A, STAT4, GZMM, SH2D1B, GZMB, PRF1, STAP1	CASP8, CD247, CTSC, CX3CR1, DDX3X, FAU, FCGR3A, GAPDH, GBP1, GBP2, GBP3, GNL1, GZMA, GZMB, GZMM, HLA-E, HLA-F, HSPD1, IL16, INPP5D, ITGB7, LCK, SH2D1A, MX1, NFATC2, PAK2, PCBP2, PHB1, PML, PRF1, PRKCH, PKN1, RAC2, RPS6KA3, SMPD1, STAT1, STAT4, TAP2, TRGC1, ZAP70, CST7, RAB29, MATR3, RBM14, TTLL12, RFTN1, PRKD2, SAMHD1, STAP1, LAT, TBK1, TBX21, CYRIB, DDX60, LYAR, ERBIN, MYO1G, GSDMD, TRAF3IP3, GB…
Cluster 1	1h post exercise	BP	GO:0002376	immune system process	63	0.491134	1.74103	0.00045797	0.00829044	0.00694681	84	tags=51%, list=30%, signal=46%	DEFA3, LTF, LCN2, CAMP, BST2, AZU1, BPI, MMP8, CFP, CD55, TLR1, MYH9, SIRPB1, CXCL2, RNASE3, ORM1, PDGFB, ANXA3, S100A12, CD101, CD99, RAF1, CD300A, CD40, SLC7A1, ALCAM, TF, SERINC3, CFI, SEMA7A, PKHD1L1, TMOD3	ADAM10, ALCAM, AMBP, ANXA3, APCS, APOD, AZU1, B2M, BPI, BST2, C6, C7, CAMP, CD40, CDC42, CD55, DDT, DEFA3, FTH1, GRB2, CXCL2, CFI, IGBP1, IGHG1, ITGB1, ITGB3, LAMP1, LCN2, LTF, CD46, CD99, MMP8, MYH9, ORM1, PDGFB, CFP, PPIB, PPP3CB, RAF1, RBP4, RNASE3, S100A12, SLC7A1, TF, TLR1, UFD1, SLC7A5, SEMA7A, CD101, MAEA, SIRPB1, SEMA4D, SERINC3, CD300A, APPL1, TMOD3, UBQLN1, WDR41, EPG5, VSIR, TREML2, PK…
Cluster 2	1h post exercise	BP	GO:0002376	immune system process	106	0.438781	1.98207	3.18147e-06	0.000248765	0.000201898	96	tags=39%, list=21%, signal=40%	CTSG, PRTN3, ELANE, BST1, MPO, LILRA3, LYZ, CD93, S100A9, PADI4, CR1, ADD2, AZGP1, SIRPA, S100A8, FCN1, SEMA4A, LRP1, PLSCR1, FCGRT, CFD, ORM2, DYSF, ITGAM, CD14, ECM1, HP, CXCL3, RNASE2, THBS4, FN1, FCGR1A, HPX, TNFSF13, CFHR1, TGFB1, CD226, CD36, IL6ST, SERPINE1, MDK	ADD2, AZGP1, BRAF, BSG, BST1, C3, C4A, C5, C8G, CALR, CASP6, CCND3, CD14, CD36, CD47, CR1, CTSG, CFD, ECM1, ELANE, F12, FCGR1A, FCGRT, FCN1, FN1, B4GALT1, GPI, CXCL3, CFHR1, HP, HPRT1, HPX, HRG, IDE, IGKC, IGLC2, IL6ST, INPPL1, ITGA2, ITGA2B, ITGAM, LRP1, LYZ, MDK, MPO, PNP, ORM2, PAFAH1B1, PRDX1, SERPINE1, PECAM1, PLSCR1, PPIA, PPP2CA, PRKCB, MAPK1, PRTN3, PSMA1, RAB4A, RNASE2, ROCK1, S100A8, S1…
Cluster 3	1h post exercise	BP	GO:0002376	immune system process	85	-0.414896	-1.82069	0.000317247	0.0117834	0.0105272	80	tags=39%, list=24%, signal=40%	HSPD1, GBP5, SH2D1A, SMPD1, HCLS1, RAC2, RASAL3, PAK2, CST7, NLRC3, TBC1D10C, ITGB7, HLA-E, CX3CR1, PHB1, LCK, HLA-F, RUNX1, TRGC1, TBX21, CD247, FAU, PYHIN1, ZAP70, GZMA, FCGR3A, STAT4, GZMM, SH2D1B, RUNX3, GZMB, PRF1, STAP1	ATM, CASP8, RUNX2, RUNX1, RUNX3, CD247, CTSC, CX3CR1, DDX3X, FAU, FCGR3A, GAPDH, GBP1, GBP2, GBP3, GNL1, GZMA, GZMB, GZMM, HCLS1, HLA-E, HLA-F, HSPD1, IL16, INPP5D, ITGB7, LCK, SH2D1A, MTHFD1, MX1, NFATC2, PAK2, PCBP2, PHB1, PML, PRF1, PRKCH, PKN1, MAP2K2, PSME1, PURB, RAC2, RPS6KA3, SMARCC2, SMPD1, STAT1, STAT4, TAP2, TRGC1, ZAP70, CST7, RAB29, CHST2, MATR3, PTBP3, RBM14, WDR37, TTLL12, RFTN1, U…
Cluster 1	1h post exercise	BP	GO:0006952	defense response	47	0.592188	2.04881	2.76875e-06	0.000108596	9.09962e-05	55	tags=49%, list=20%, signal=47%	DEFA3, MMP9, LTF, LCN2, CAMP, BST2, AZU1, BPI, MMP8, CFP, CD55, TLR1, CXCL2, RNASE3, ORM1, ANXA3, S100A12, NT5E, RAF1, PLGRKT, CD300A, PTGIR, CD40	ANXA3, APCS, APOD, AZU1, BPI, BST2, C6, C7, CAMP, CD40, CDC42, CD55, DDT, DEFA3, GNG7, CXCL2, CFI, IGHG1, ITGB1, LAMP1, LCN2, LGALS3BP, LGALS8, LTF, CD46, MMP8, MMP9, NT5E, ORM1, CFP, PSMA6, PTGIR, RAF1, RNASE3, S100A12, PPP1R11, TF, TLR1, UFD1, SEMA7A, SERINC3, CD300A, APPL1, UBQLN1, PLGRKT, ALS2, EPG5
Cluster 2	Post exercise	BP	GO:0006952	defense response	77	-0.521297	-1.60894	0.000234684	0.0262377	0.0246542	92	tags=40%, list=20%, signal=39%	CARD9, TIMP1, IL6ST, TGFB1, SLC18A2, CTSG, C3, MDK, PLSCR1, ITIH4, HRG, SERPINE1, S100A9, CST3, B4GALT1, HYAL3, RNASE2, CD14, CR1, ATRN, PRTN3, F12, PLPP6, LYZ, MPO, CFD, LRP1, SIRPA, FCN1, PADI4, FCGR1A	BST1, C3, C4A, C5, C8G, CASP6, CD14, CD36, CD47, CR1, CST3, CTSG, CFD, ECM1, ELANE, F12, FCGR1A, FCN1, FN1, B4GALT1, CXCL3, GSTP1, CFHR1, HP, HPX, HRG, HSPG2, IL6ST, ITGAM, ITIH4, KLKB1, LRP1, LYZ, MDK, MPO, ORM2, PRDX1, SERPINE1, PLSCR1, PPP2CA, PRTN3, PSMA1, RNASE2, S100A8, S100A9, SLC18A2, SOD1, ADAM17, TGFB1, TIMP1, VDAC3, YES1, YWHAE, HYAL3, ATRN, USP15, ZMPSTE24, CD226, NT5C2, ENDOD1, STAB1…
Cluster 2	1h post exercise	BP	GO:0006952	defense response	77	0.537083	2.36686	9.62253e-09	2.6895e-06	2.18279e-06	148	tags=64%, list=32%, signal=52%	CTSG, PRTN3, ELANE, BST1, MPO, LYZ, S100A9, PADI4, CR1, SIRPA, S100A8, FCN1, CST3, LRP1, PLSCR1, CFD, ORM2, ATRN, ITGAM, CD14, ECM1, HP, CXCL3, TIMP1, RNASE2, FN1, HSPG2, FCGR1A, HPX, CFHR1, TGFB1, CD226, CD36, IL6ST, SERPINE1, MDK, HYAL3, CLEC1B, F12, PLPP6, SOD1, ITIH4, F11R, KLKB1, HRG, VDAC3, ENDOD1, CD47, SLC18A2	BST1, C3, C4A, C5, C8G, CASP6, CD14, CD36, CD47, CR1, CST3, CTSG, CFD, ECM1, ELANE, F12, FCGR1A, FCN1, FN1, B4GALT1, CXCL3, GSTP1, CFHR1, HP, HPX, HRG, HSPG2, IL6ST, ITGAM, ITIH4, KLKB1, LRP1, LYZ, MDK, MPO, ORM2, PRDX1, SERPINE1, PLSCR1, PPP2CA, PRTN3, PSMA1, RNASE2, S100A8, S100A9, SLC18A2, SOD1, ADAM17, TGFB1, TIMP1, VDAC3, YES1, YWHAE, HYAL3, ATRN, USP15, ZMPSTE24, CD226, NT5C2, ENDOD1, STAB1…
Cluster 3	1h post exercise	BP	GO:0006952	defense response	61	-0.425579	-1.80409	0.000677718	0.0173006	0.0154561	53	tags=33%, list=16%, signal=34%	PAK2, CST7, NLRC3, RPS6KA5, HLA-E, CX3CR1, PHB1, LCK, HLA-F, FAU, PYHIN1, ZAP70, FCGR3A, STAT4, GZMM, SH2D1B, GZMB, PRF1, ABI3, STAP1	ATM, CASP8, CTSC, CX3CR1, DDX3X, FAU, FCGR3A, GAPDH, GBP1, GBP2, GBP3, GZMB, GZMM, HLA-E, HLA-F, HSPD1, IL16, LCK, SH2D1A, MECP2, MX1, NCBP1, PAK2, PCBP2, PHB1, PML, PRF1, RPS6KA3, SMPD1, STAT1, STAT4, ZAP70, CST7, TRADD, RPS6KA5, CHST2, MATR3, RBM14, TXNIP, TTLL12, RFTN1, UFL1, SHPK, SAMHD1, STAP1, LAT, STK39, TBK1, ABI3, DDX60, LYAR, ERBIN, SCYL3, RNF213, GSDMD, TRAF3IP3, SLFN11, GBP5, SH2D1B, …
Cluster 1	1h post exercise	BP	GO:0044419	biological process involved in interspecies interaction between organisms	48	0.56431	1.95264	2.58307e-05	0.000828931	0.000694586	74	tags=52%, list=27%, signal=46%	DEFA3, MMP9, LTF, LCN2, CAMP, BST2, AZU1, BPI, MMP8, CFP, CD55, TLR1, CXCL2, RNASE3, ANXA3, S100A12, RAF1, CD300A, PTGIR, CD40, SLC7A1, TF, VIL1, SERINC3, CFI	ANXA3, APCS, AZU1, B2M, BPI, BST2, C6, C7, CAMP, CD40, CDC42, CD55, DEFA3, CXCL2, CFI, IGHG1, ITGB1, ITGB3, LAMP1, LCN2, LGALS8, LTF, CD46, MMP8, MMP9, CFP, PPIB, PTGIR, RAF1, UPF1, RNASE3, S100A12, SLC7A1, PPP1R11, TF, TLR1, UFD1, VIL1, SLC7A5, PAIP1, PRDX3, SERINC3, CD300A, APPL1, UBQLN1, EPG5, YTHDC2, ZDHHC20
Cluster 2	1h post exercise	BP	GO:0044419	biological process involved in interspecies interaction between organisms	82	0.418947	1.85716	0.000375947	0.00764197	0.00620222	109	tags=41%, list=23%, signal=39%	CTSG, PRTN3, ELANE, MPO, LYZ, S100A9, PADI4, CR1, ANPEP, SIRPA, S100A8, FCN1, PLSCR1, CFD, ITGAM, CD14, HP, CXCL3, RNASE2, FN1, FCGR1A, HPX, CFHR1, PLSCR3, TGFB1, CD226, CD36, TPT1, SERPINE1, HYAL3, ITGAV, F12, ITGA5, PLPP6	ADH5, ALAD, ANPEP, ARF1, BSG, C3, C4A, C5, C8G, CALR, CASP6, CD14, CD36, CD47, CNP, CR1, CTSB, CTSG, CFD, ELANE, ENO1, STOM, F12, FCGR1A, FCN1, FN1, FUCA2, CXCL3, GSTP1, CFHR1, HP, HPX, HRG, IDE, ITGA2, ITGA5, ITGAM, ITGAV, LYZ, MPO, PRDX1, SERPINE1, PLSCR1, PPIA, PPP2CA, MAPK1, PRTN3, PSMA2, RNASE2, S100A8, S100A9, SLC3A2, ADAM17, TGFB1, TPT1, YES1, YWHAE, RAB7A, HYAL3, USP15, ZMPSTE24, CD226, N…
Cluster 3	1h post exercise	BP	GO:0044419	biological process involved in interspecies interaction between organisms	61	-0.439336	-1.86241	0.000309668	0.0117834	0.0105272	37	tags=30%, list=11%, signal=32%	ITGB7, HLA-E, CX3CR1, PHB1, LCK, HLA-F, TBX21, FAU, PYHIN1, ZAP70, GZMA, FCGR3A, GZMM, GZMH, SH2D1B, GZMB, PRF1, STAP1	CAPN2, CASP8, CX3CR1, DDX3X, FAU, FCGR3A, GAPDH, GBP1, GBP2, GBP3, GZMH, GZMA, GZMB, GZMM, HLA-E, HLA-F, HSPD1, ITGB7, KPNA3, LCK, SH2D1A, MECP2, MX1, NCAM1, NCBP1, PAK2, PCBP2, PHB1, PML, PRF1, RPS6KA3, SMPD1, STAT1, TAP2, WIPF1, ZAP70, RAB29, RAB9A, MATR3, RBM14, CDK19, TTLL12, RFTN1, SHPK, SAMHD1, STAP1, TBK1, SAP30BP, TBX21, CYRIB, DDX60, LYAR, ERBIN, RNF213, GSDMD, TRAF3IP3, SLFN11, GBP5, SH…

## Sheet: GSEA overlap cluster 1 & 2
Cluster	Timepoint	ONTOLOGY	ID	Description	setSize	enrichmentScore	NES	pvalue	p.adjust	qvalue	rank	leading_edge	core_enrichment	annotated_proteins
Cluster 1	1h post exercise	BP	GO:0071216	cellular response to biotic stimulus	12	0.855863	2.48215	1.19086e-07	1.20107e-05	1.00641e-05	27	tags=75%, list=10%, signal=71%	DEFA3, MMP9, LTF, CAMP, BPI, MMP8, CD55, TLR1, CXCL2	BPI, CAMP, CD40, CD55, DEFA3, CXCL2, LTF, MMP8, MMP9, UPF1, TLR1, SLC7A5
Cluster 2	1h post exercise	BP	GO:0071216	cellular response to biotic stimulus	11	0.693218	2.25651	0.000284809	0.00636834	0.00516854	95	tags=73%, list=20%, signal=59%	CTSG, CDA, SIRPA, CD14, CXCL3, PLSCR3, CD36, SERPINE1	CD14, CD36, CDA, CTSG, CXCL3, GSTP1, SERPINE1, MAPK1, ZMPSTE24, PLSCR3, SIRPA
Cluster 1	1h post exercise	BP	GO:0042742	defense response to bacterium	13	0.796822	2.34563	1.01821e-06	5.80846e-05	4.86709e-05	39	tags=77%, list=14%, signal=69%	DEFA3, LTF, LCN2, CAMP, AZU1, BPI, CFP, RNASE3, ANXA3, S100A12	ANXA3, AZU1, BPI, CAMP, DEFA3, IGHG1, LCN2, LTF, CFP, RNASE3, S100A12, PPP1R11, TF
Cluster 2	1h post exercise	BP	GO:0042742	defense response to bacterium	14	0.676863	2.31123	0.000184782	0.00459082	0.0037259	95	tags=71%, list=20%, signal=59%	CTSG, ELANE, MPO, LYZ, S100A9, S100A8, HP, FCGR1A, CD36, SERPINE1	CD36, CTSG, ELANE, FCGR1A, HP, LYZ, MPO, SERPINE1, S100A8, S100A9, ADAM17, STAB1, IGKV3-20, CARD9
Cluster 1	1h post exercise	BP	GO:0009617	response to bacterium	25	0.723575	2.33362	1.65455e-07	1.46014e-05	1.2235e-05	39	tags=60%, list=14%, signal=57%	DEFA3, MMP9, LTF, LCN2, CAMP, AZU1, BPI, MMP8, CFP, CD55, TLR1, CXCL2, RNASE3, ANXA3, S100A12	ANXA3, AZU1, B2M, BPI, CAMP, CD40, CD55, DEFA3, CXCL2, IGHG1, LCN2, LTF, MMP8, MMP9, CFP, PTGIR, UPF1, RNASE3, S100A12, PPP1R11, TF, TLR1, VIL1, SLC7A5, PRDX3
Cluster 2	1h post exercise	BP	GO:0009617	response to bacterium	29	0.572262	2.2437	3.84464e-05	0.00153511	0.0012459	95	tags=55%, list=20%, signal=47%	CTSG, ELANE, MPO, LYZ, S100A9, SIRPA, S100A8, CFD, ITGAM, CD14, HP, CXCL3, FCGR1A, PLSCR3, CD36, SERPINE1	ADH5, ALAD, C3, CD14, CD36, CNP, CTSG, CFD, ELANE, FCGR1A, FUCA2, CXCL3, GSTP1, HP, ITGAM, LYZ, MPO, SERPINE1, MAPK1, S100A8, S100A9, ADAM17, RAB7A, STAB1, SLC17A5, IGKV3-20, PLSCR3, CARD9, SIRPA
Cluster 1	1h post exercise	BP	GO:0002237	response to molecule of bacterial origin	15	0.780651	2.33372	1.06955e-06	5.80846e-05	4.86709e-05	27	tags=60%, list=10%, signal=57%	DEFA3, MMP9, LTF, CAMP, BPI, MMP8, CD55, TLR1, CXCL2	B2M, BPI, CAMP, CD40, CD55, DEFA3, CXCL2, LTF, MMP8, MMP9, PTGIR, UPF1, TLR1, SLC7A5, PRDX3
Cluster 2	1h post exercise	BP	GO:0002237	response to molecule of bacterial origin	18	0.630559	2.28267	7.05043e-05	0.00225211	0.00182781	95	tags=61%, list=20%, signal=51%	CTSG, ELANE, MPO, S100A9, SIRPA, S100A8, CD14, CXCL3, PLSCR3, CD36, SERPINE1	ADH5, ALAD, CD14, CD36, CNP, CTSG, ELANE, CXCL3, GSTP1, MPO, SERPINE1, MAPK1, S100A8, S100A9, ADAM17, PLSCR3, CARD9, SIRPA
Cluster 1	1h post exercise	BP	GO:0001816	cytokine production	19	0.616267	1.92329	0.00105848	0.0152507	0.012779	35	tags=42%, list=13%, signal=40%	LTF, BST2, AZU1, BPI, MMP8, CD55, TLR1, ORM1	APOD, AZU1, B2M, BPI, BST2, CD55, DDT, LTF, CD46, MMP8, ORM1, PPP1R11, TLR1, UFD1, SLC7A5, SEMA7A, NFAT5, APPL1, VSIR
Cluster 2	1h post exercise	BP	GO:0001816	cytokine production	27	0.491849	1.91097	0.00494507	0.0484964	0.0393597	145	tags=63%, list=31%, signal=46%	ELANE, CR1, SIRPA, FCN1, ORM2, CD14, FN1, TGFB1, CD226, CD36, IL6ST, SERPINE1, MDK, ITGAV, SOD1, F11R, CD47	ARRB1, C3, C5, CD14, CD36, CD47, CR1, ELANE, FCN1, FN1, GSTP1, IL6ST, ITGAV, MDK, PNP, ORM2, SERPINE1, SOD1, ADAM17, TGFB1, CD226, TMED10, DICER1, IL17RA, F11R, CARD9, SIRPA
Cluster 1	1h post exercise	CC	GO:0031410	cytoplasmic vesicle	98	0.531858	1.95626	7.70542e-07	4.94548e-05	4.14397e-05	39	tags=31%, list=14%, signal=41%	DEFA3, MMP9, LTF, LCN2, C1orf35, CAMP, BST2, AZU1, BPI, MMP8, STBD1, RETN, CFP, DSE, CLTCL1, CD55, TLR1, FCHO2, VMA21, MYH9, SIRPB1, RNASE3, MYH11, STEAP4, RAB3A, DGKH, ORM1, PDGFB, ANXA3, S100A12	ADAM10, ALB, ANXA3, ATP6AP1, AZU1, B2M, BPI, BST2, CAMP, CDC42, CLTA, CD55, DEFA3, FTH1, GNAI2, GRB2, ITGB1, ITGB3, KCNA1, LAMP1, LAMP2, LCN2, LGALS3BP, LGALS8, LTF, M6PR, CD46, MMP8, MMP9, MYH9, MYH11, MYO1D, ORM1, PAFAH1B2, PDGFB, CFP, PLD1, PPIB, RAB3A, RNASE3, RPN1, S100A12, SLA, TF, TLR1, VCP, PTP4A1, CLTCL1, CPNE3, STBD1, COPB2, DNAJC6, AP1M2, ARPC5, ARPC2, SIRPB1, PRDX4, STAMBP, VAMP5, PRD…
Cluster 2	1h post exercise	CC	GO:0031410	cytoplasmic vesicle	167	0.40299	1.87678	1.63363e-05	0.000794086	0.00064448	135	tags=43%, list=29%, signal=47%	CTSG, PRTN3, ELANE, BST1, MPO, LILRA3, LYZ, OSCAR, CD93, CDA, MCEMP1, S100A9, CR1, ADD2, ANPEP, SIRPA, S100A8, DLG4, FCN1, CST3, LRP1, GCA, FCGRT, CFD, ORM2, DYSF, CEMIP, SIGLEC9, ITGAM, MGST1, CD14, ECM1, HP, TIMP1, RNASE2, FN1, A1BG, GM2A, FCGR1A, HPX, SPARC, QSOX1, TGFB1, CD36, TPT1, ACP3, SERPINE1, TMEM168, ALDH3B1, TMEM30A, HYAL3, ITGAV, CTSZ, ITGA5, SELENOP, VWF, ARSB, FAM3C, SYNGR2, SOD1, …	A1BG, ACLY, ACP3, ADD2, ALAD, ALDH3B1, ALDOA, ANPEP, APEH, APLP2, ARRB1, ARSB, ATP6V0A1, BSG, BST1, C3, CALR, CAT, CD14, CD36, CD47, CDA, AP2M1, CNP, CR1, CST3, CTSB, CTSG, CTSZ, CFD, CYB5R3, DLD, DLG4, ECM1, ELANE, STOM, ESD, FCGR1A, FCGRT, FCN1, FN1, FUCA2, GDI2, B4GALT1, GM2A, GNS, GPI, GSTP1, HP, HPX, HRG, ITGA2B, ITGA5, ITGAM, ITGAV, ITIH3, ITIH4, LRP1, LYZ, MAN2B1, MGST1, MPO, MTM1, SEPTIN2…
Cluster 1	1h post exercise	CC	GO:0060205	cytoplasmic vesicle lumen	24	0.726091	2.33004	8.96616e-08	1.20107e-05	1.00641e-05	39	tags=58%, list=14%, signal=55%	DEFA3, LTF, LCN2, C1orf35, CAMP, AZU1, BPI, MMP8, RETN, CFP, RNASE3, ORM1, PDGFB, S100A12	ALB, AZU1, B2M, BPI, CAMP, DEFA3, LCN2, LGALS3BP, LTF, MMP8, ORM1, PAFAH1B2, PDGFB, CFP, RNASE3, S100A12, TF, VCP, ARPC5, PRDX4, ERP44, RETN, C1orf35, TXNDC5
Cluster 2	1h post exercise	CC	GO:0060205	cytoplasmic vesicle lumen	58	0.523867	2.23254	1.42891e-06	0.000122886	9.97343e-05	130	tags=59%, list=28%, signal=48%	CTSG, PRTN3, ELANE, MPO, LYZ, OSCAR, CDA, S100A9, S100A8, FCN1, GCA, CFD, ORM2, ECM1, HP, TIMP1, RNASE2, FN1, A1BG, GM2A, SPARC, QSOX1, TGFB1, SERPINE1, CTSZ, SELENOP, VWF, ARSB, FAM3C, ALAD, PDGFA, PGAM1, ITIH4, VAT1	A1BG, ACLY, ALAD, ALDOA, ARSB, C3, CAT, CDA, CTSG, CTSZ, CFD, CYB5R3, ECM1, ELANE, FCN1, FN1, FUCA2, GDI2, GM2A, GNS, GPI, GSTP1, HP, HRG, ITIH3, ITIH4, LYZ, MAN2B1, MPO, PNP, ORM2, SERPINE1, PDGFA, PGAM1, PPIA, MAPK1, PROS1, PRTN3, PSMA2, PSMB1, PSMB7, QSOX1, RNASE2, ROCK1, S100A8, S100A9, SELENOP, SPARC, TGFB1, TIMP1, VWF, GGH, FAM3C, VAT1, GCA, OLA1, TOLLIP, OSCAR
Cluster 1	1h post exercise	BP	GO:0098542	defense response to other organism	32	0.60932	2.01241	3.39564e-05	0.000998885	0.000836996	51	tags=50%, list=18%, signal=46%	DEFA3, LTF, LCN2, CAMP, BST2, AZU1, BPI, CFP, CD55, TLR1, CXCL2, RNASE3, ANXA3, S100A12, RAF1, CD300A	ANXA3, APCS, AZU1, BPI, BST2, C6, C7, CAMP, CDC42, CD55, DEFA3, CXCL2, CFI, IGHG1, LAMP1, LCN2, LGALS8, LTF, CD46, CFP, RAF1, RNASE3, S100A12, PPP1R11, TF, TLR1, UFD1, SERINC3, CD300A, APPL1, UBQLN1, EPG5
Cluster 2	1h post exercise	BP	GO:0098542	defense response to other organism	52	0.517844	2.18157	3.56015e-06	0.000248765	0.000201898	109	tags=52%, list=23%, signal=45%	CTSG, PRTN3, ELANE, MPO, LYZ, S100A9, PADI4, CR1, SIRPA, S100A8, FCN1, PLSCR1, CFD, ITGAM, CD14, HP, CXCL3, RNASE2, FCGR1A, HPX, CFHR1, TGFB1, CD226, CD36, SERPINE1, F12, PLPP6	C3, C4A, C5, C8G, CASP6, CD14, CD36, CD47, CR1, CTSG, CFD, ELANE, F12, FCGR1A, FCN1, CXCL3, CFHR1, HP, HPX, HRG, ITGAM, LYZ, MPO, PRDX1, SERPINE1, PLSCR1, PPP2CA, PRTN3, RNASE2, S100A8, S100A9, ADAM17, TGFB1, YES1, YWHAE, USP15, ZMPSTE24, CD226, NT5C2, ENDOD1, STAB1, PADI4, IL17RA, IGKV3-20, TOLLIP, GPR108, RTN4, CARD9, CLPB, VPS26B, SIRPA, PLPP6
Cluster 1	1h post exercise	BP	GO:0140546	defense response to symbiont	29	0.624565	2.047	3.28339e-05	0.000998885	0.000836996	51	tags=52%, list=18%, signal=47%	DEFA3, LTF, LCN2, CAMP, BST2, AZU1, BPI, CFP, CD55, TLR1, CXCL2, RNASE3, S100A12, RAF1, CD300A	APCS, AZU1, BPI, BST2, C6, C7, CAMP, CDC42, CD55, DEFA3, CXCL2, CFI, IGHG1, LAMP1, LCN2, LTF, CD46, CFP, RAF1, RNASE3, S100A12, TF, TLR1, UFD1, SERINC3, CD300A, APPL1, UBQLN1, EPG5
Cluster 2	1h post exercise	BP	GO:0140546	defense response to symbiont	47	0.515832	2.14605	1.43816e-05	0.000794086	0.00064448	87	tags=47%, list=19%, signal=42%	CTSG, PRTN3, ELANE, LYZ, S100A9, PADI4, CR1, SIRPA, S100A8, FCN1, PLSCR1, CFD, ITGAM, CD14, CXCL3, RNASE2, FCGR1A, HPX, CFHR1, TGFB1, CD226, CD36	C3, C4A, C5, C8G, CASP6, CD14, CD36, CD47, CR1, CTSG, CFD, ELANE, F12, FCGR1A, FCN1, CXCL3, CFHR1, HPX, HRG, ITGAM, LYZ, PRDX1, PLSCR1, PPP2CA, PRTN3, RNASE2, S100A8, S100A9, TGFB1, YES1, YWHAE, USP15, ZMPSTE24, CD226, NT5C2, ENDOD1, PADI4, IL17RA, IGKV3-20, TOLLIP, GPR108, RTN4, CARD9, CLPB, VPS26B, SIRPA, PLPP6
Cluster 1	1h post exercise	CC	GO:0012505	endomembrane system	124	0.449612	1.66605	0.000334935	0.00639092	0.00535515	46	tags=27%, list=16%, signal=40%	DEFA3, MMP9, LTF, LCN2, C1orf35, CAMP, BST2, AZU1, BPI, MMP8, STBD1, RETN, CFP, DSE, CLTCL1, CD55, TLR1, FCHO2, VMA21, MYH9, SIRPB1, RNASE3, STEAP4, RAB3A, DGKH, ORM1, PDGFB, FUT11, ANXA3, S100A12, MYO1D, RAF1, PTP4A1	ADAM10, ALB, AMBP, ANXA3, APOD, ATP6AP1, AZU1, B2M, BPI, BST2, CAMP, CDC42, CLTA, CD55, DEFA3, FTH1, GNAI2, GOLGA3, GRB2, DNAJA1, IGFBP7, ITGB1, ITGB3, KCNA1, LAMP1, LAMP2, LCN2, LGALS3BP, LTF, M6PR, CD46, MEST, MMP8, MMP9, MYH9, MYO1D, ORM1, OSBP, PAFAH1B2, PDGFB, CFP, PLD1, PPIB, RAB3A, RAD23A, RAF1, RNASE3, RPN1, S100A12, SLA, TF, TLR1, TSN, UFD1, VCP, PTP4A1, MANF, CLTCL1, PIP4K2B, CPNE3, STB…
Cluster 2	Post exercise	CC	GO:0012505	endomembrane system	247	-0.441692	-1.42775	0.000266582	0.0270944	0.0254592	143	tags=38%, list=31%, signal=56%	DNAJB11, C4A, MLEC, TKT, GLIPR2, TOLLIP, CD93, TPCN1, ADAM17, LAMB1, PTDSS2, FKBP7, AGPAT3, MTM1, ELANE, RAP1B, PIEZO1, PROS1, GGH, NCSTN, FAM3C, SYNGR2, ALDH3A2, CD109, EPHX1, RAB10, GCA, SORT1, XXYLT1, TIMP1, ACSL1, TGFB1, FUCA2, SLC18A2, ARL5A, GALNT4, SIGMAR1, PDGFD, CTSG, TPT1, CHSY1, C3, SLC22A18, PLSCR1, QSOX1, GALNT2, APLP2, LILRA3, MAN2A1, SPARC, PLOD3, ITIH4, MCEMP1, HRG, SERPINE1, S100…	A1BG, ACLY, ACP3, ALAD, ALDH3B1, ALDH3A2, ALDOA, ANPEP, APEH, APLP2, ARF1, ARL3, ARRB1, ARSB, ATP6V0A1, BSG, BST1, C3, C4A, CALR, CAT, CD14, CD36, CD47, CDA, AP2M1, CP, CR1, CRAT, VCAN, CST3, CTSB, CTSG, CTSZ, DAD1, CFD, CYB5R3, DLD, DLG4, ECM1, ELANE, ENO1, STOM, EPHX1, ESD, F12, ACSL1, ACSL4, FCGR1A, FCGRT, FCN1, FKBP2, FN1, FUCA2, GALNT2, GDI1, GDI2, B4GALT1, GM2A, GNS, GPI, GPX4, GSTP1, HP, H…
Cluster 1	1h post exercise	BP	GO:0006959	humoral immune response	15	0.693921	2.07445	0.000193851	0.00402527	0.00337289	39	tags=60%, list=14%, signal=55%	DEFA3, LTF, CAMP, AZU1, CFP, CD55, CXCL2, RNASE3, S100A12	AZU1, C6, C7, CAMP, CD55, DEFA3, CXCL2, CFI, IGHG1, LTF, CD46, CFP, RNASE3, S100A12, TF
Cluster 2	1h post exercise	BP	GO:0006959	humoral immune response	20	0.642168	2.3585	3.22727e-05	0.00133633	0.00108456	79	tags=60%, list=17%, signal=52%	CTSG, PRTN3, ELANE, BST1, LYZ, S100A9, CR1, FCN1, CFD, CXCL3, HPX, CFHR1	BST1, C3, C4A, C5, C8G, CR1, CTSG, CFD, ELANE, FCN1, GPI, CXCL3, CFHR1, HPX, HRG, LYZ, PRTN3, S100A9, ST6GAL1, IGKV3-20
Cluster 1	1h post exercise	BP	GO:0006954	inflammatory response	19	0.595842	1.85955	0.0022384	0.0277248	0.0232314	55	tags=58%, list=20%, signal=50%	MMP9, AZU1, MMP8, TLR1, CXCL2, ORM1, S100A12, NT5E, PLGRKT, PTGIR, CD40	APCS, APOD, AZU1, CD40, DDT, CXCL2, IGHG1, ITGB1, MMP8, MMP9, NT5E, ORM1, PSMA6, PTGIR, S100A12, TLR1, SEMA7A, APPL1, PLGRKT
Cluster 2	1h post exercise	BP	GO:0006954	inflammatory response	47	0.532912	2.21711	4.94269e-06	0.000325054	0.000263814	148	tags=68%, list=32%, signal=52%	ELANE, BST1, LYZ, S100A9, SIRPA, S100A8, LRP1, PLSCR1, ORM2, ATRN, ITGAM, CD14, ECM1, HP, CXCL3, TIMP1, FN1, HSPG2, FCGR1A, TGFB1, CD36, IL6ST, SERPINE1, MDK, HYAL3, F12, SOD1, ITIH4, F11R, KLKB1, CD47, SLC18A2	BST1, C3, C4A, C5, CD14, CD36, CD47, ECM1, ELANE, F12, FCGR1A, FN1, B4GALT1, CXCL3, GSTP1, HP, HSPG2, IL6ST, ITGAM, ITIH4, KLKB1, LRP1, LYZ, MDK, ORM2, SERPINE1, PLSCR1, PPP2CA, PSMA1, S100A8, S100A9, SLC18A2, SOD1, TGFB1, TIMP1, YES1, HYAL3, ATRN, STAB1, MKRN2, IL17RA, F11R, TOLLIP, CARD9, SIRPA, ANO6, DAGLB
Cluster 1	1h post exercise	BP	GO:0045087	innate immune response	25	0.632954	2.04136	6.59921e-05	0.00172557	0.00144591	51	tags=52%, list=18%, signal=47%	DEFA3, LTF, LCN2, CAMP, BST2, BPI, CFP, CD55, TLR1, RNASE3, S100A12, RAF1, CD300A	APCS, BPI, BST2, C6, C7, CAMP, CDC42, CD55, DEFA3, CFI, LAMP1, LCN2, LTF, CD46, CFP, RAF1, RNASE3, S100A12, TLR1, UFD1, SERINC3, CD300A, APPL1, UBQLN1, EPG5
Cluster 2	1h post exercise	BP	GO:0045087	innate immune response	37	0.452112	1.83675	0.00342233	0.0375114	0.0304442	109	tags=49%, list=23%, signal=41%	S100A9, PADI4, CR1, SIRPA, S100A8, FCN1, PLSCR1, CFD, ITGAM, CD14, RNASE2, FCGR1A, HPX, TGFB1, CD226, CD36, F12, PLPP6	C3, C4A, C5, C8G, CASP6, CD14, CD36, CD47, CR1, CFD, F12, FCGR1A, FCN1, HPX, ITGAM, PRDX1, PLSCR1, PPP2CA, RNASE2, S100A8, S100A9, TGFB1, YES1, YWHAE, USP15, CD226, ENDOD1, PADI4, IL17RA, TOLLIP, GPR108, RTN4, CARD9, CLPB, VPS26B, SIRPA, PLPP6
Cluster 1	1h post exercise	CC	GO:0097708	intracellular vesicle	99	0.529363	1.9458	4.47004e-07	3.15585e-05	2.64438e-05	39	tags=30%, list=14%, signal=40%	DEFA3, MMP9, LTF, LCN2, C1orf35, CAMP, BST2, AZU1, BPI, MMP8, STBD1, RETN, CFP, DSE, CLTCL1, CD55, TLR1, FCHO2, VMA21, MYH9, SIRPB1, RNASE3, MYH11, STEAP4, RAB3A, DGKH, ORM1, PDGFB, ANXA3, S100A12	ADAM10, ALB, ANXA3, ATP6AP1, AZU1, B2M, BPI, BST2, CAMP, CDC42, CLTA, CD55, DEFA3, FTH1, GNAI2, GRB2, ITGB1, ITGB3, KCNA1, LAMP1, LAMP2, LCN2, LGALS3BP, LGALS8, LTF, M6PR, CD46, MMP8, MMP9, MYH9, MYH11, MYO1D, ORM1, PAFAH1B2, PDGFB, CFP, PLD1, PPIB, RAB3A, RNASE3, RPN1, S100A12, SLA, TF, TLR1, VCP, PTP4A1, CLTCL1, CPNE3, STBD1, COPB2, DNAJC6, AP1M2, ARPC5, ARPC2, SIRPB1, PRDX4, STAMBP, VAMP5, PRD…
Cluster 2	1h post exercise	CC	GO:0097708	intracellular vesicle	167	0.40299	1.87678	1.63363e-05	0.000794086	0.00064448	135	tags=43%, list=29%, signal=47%	CTSG, PRTN3, ELANE, BST1, MPO, LILRA3, LYZ, OSCAR, CD93, CDA, MCEMP1, S100A9, CR1, ADD2, ANPEP, SIRPA, S100A8, DLG4, FCN1, CST3, LRP1, GCA, FCGRT, CFD, ORM2, DYSF, CEMIP, SIGLEC9, ITGAM, MGST1, CD14, ECM1, HP, TIMP1, RNASE2, FN1, A1BG, GM2A, FCGR1A, HPX, SPARC, QSOX1, TGFB1, CD36, TPT1, ACP3, SERPINE1, TMEM168, ALDH3B1, TMEM30A, HYAL3, ITGAV, CTSZ, ITGA5, SELENOP, VWF, ARSB, FAM3C, SYNGR2, SOD1, …	A1BG, ACLY, ACP3, ADD2, ALAD, ALDH3B1, ALDOA, ANPEP, APEH, APLP2, ARRB1, ARSB, ATP6V0A1, BSG, BST1, C3, CALR, CAT, CD14, CD36, CD47, CDA, AP2M1, CNP, CR1, CST3, CTSB, CTSG, CTSZ, CFD, CYB5R3, DLD, DLG4, ECM1, ELANE, STOM, ESD, FCGR1A, FCGRT, FCN1, FN1, FUCA2, GDI2, B4GALT1, GM2A, GNS, GPI, GSTP1, HP, HPX, HRG, ITGA2B, ITGA5, ITGAM, ITGAV, ITIH3, ITIH4, LRP1, LYZ, MAN2B1, MGST1, MPO, MTM1, SEPTIN2…
Cluster 1	1h post exercise	BP	GO:0040011	locomotion	38	0.527655	1.7776	0.000819718	0.012862	0.0107775	69	tags=53%, list=25%, signal=46%	MMP9, BST2, AZU1, PRKX, CXCL2, RNASE3, KRT5, PDGFB, ANXA3, S100A12, CD99, RAF1, PTP4A1, PLGRKT, CD300A, FERMT2, CD40, PLD1, TF, VIL1	ADAM10, ANXA3, APOD, AZU1, BST2, CD40, CDC42, DDT, GNAI2, CXCL2, ITGB1, ITGB3, KRT5, CD99, MMP9, PDGFB, PLD1, PPIB, PPP3CB, PRKX, RAF1, RDX, RNASE3, S100A12, TF, VIL1, PTP4A1, RECK, SEMA7A, CPNE3, SEMA4D, FERMT2, CD300A, APPL1, DNAJA4, PLGRKT, VSIR, MIEN1
Cluster 2	1h post exercise	BP	GO:0040011	locomotion	59	0.404426	1.72525	0.00331133	0.0370207	0.030046	114	tags=44%, list=24%, signal=38%	CTSG, ELANE, BST1, S100A9, S100A8, SEMA4A, LRP1, CEMIP, ECM1, CXCL3, TIMP1, RNASE2, THBS4, FN1, TPM1, SPARC, ENG, TGFB1, SERPINE1, MDK, PDGFC, LAMA4, ITGAV, ITGA5, ARSB, GLIPR2	ARSB, BRAF, BSG, BST1, C5, CALR, CD47, CTSG, ECM1, ELANE, ENG, FN1, GPI, CXCL3, HRG, ITGA2, ITGA2B, ITGA5, ITGAV, LAMA4, LAMB1, LRP1, MDK, MGAT5, SERPINE1, PDGFA, PECAM1, PFN1, PPIA, MAPK1, RALA, RNASE2, ROCK1, S100A8, S100A9, ST6GAL1, SPARC, ADAM17, TGFB1, THBS4, TIMP1, TPM1, SLK, SEMA4B, CAPN7, CORO1C, PLXNB2, IL17RA, ELP6, PDGFC, RTN4, CEMIP, MEAK7, SEMA4A, MCTP1, PDGFD, GLIPR2, MOSPD2, ANO6
Cluster 1	1h post exercise	BP	GO:0001817	regulation of cytokine production	18	0.631754	1.94785	0.000902146	0.0135514	0.0113551	35	tags=44%, list=13%, signal=42%	LTF, BST2, AZU1, BPI, MMP8, CD55, TLR1, ORM1	APOD, AZU1, B2M, BPI, BST2, CD55, DDT, LTF, CD46, MMP8, ORM1, PPP1R11, TLR1, UFD1, SLC7A5, SEMA7A, APPL1, VSIR
Cluster 2	1h post exercise	BP	GO:0001817	regulation of cytokine production	27	0.491849	1.91097	0.00494507	0.0484964	0.0393597	145	tags=63%, list=31%, signal=46%	ELANE, CR1, SIRPA, FCN1, ORM2, CD14, FN1, TGFB1, CD226, CD36, IL6ST, SERPINE1, MDK, ITGAV, SOD1, F11R, CD47	ARRB1, C3, C5, CD14, CD36, CD47, CR1, ELANE, FCN1, FN1, GSTP1, IL6ST, ITGAV, MDK, PNP, ORM2, SERPINE1, SOD1, ADAM17, TGFB1, CD226, TMED10, DICER1, IL17RA, F11R, CARD9, SIRPA
Cluster 1	1h post exercise	BP	GO:0051239	regulation of multicellular organismal process	56	0.501659	1.7656	0.000353162	0.00656138	0.00549798	69	tags=45%, list=25%, signal=42%	MMP9, LTF, LCN2, CAMP, BST2, AZU1, BPI, MMP8, RETN, PRKX, CD55, TLR1, SIRPB1, ORM1, PDGFB, ANXA3, CD101, CD300A, FERMT2, CD40, DKK1, SLC7A1, FXN, TF, VIL1	ADAM10, ANXA3, APCS, APOD, AZU1, B2M, BPI, BST2, CAMP, CD40, CD55, DDT, FXN, GNAI2, ITGB1, ITGB3, KCNA1, LCN2, LTF, CD46, MMP8, MMP9, NRDC, ORM1, P2RY1, PDGFB, PPIB, PPP1CC, PRKX, RBP4, SLC7A1, PPP1R11, TF, TLR1, UFD1, VIL1, SLC7A5, RECK, SEMA7A, CD101, GSTO1, SIRPB1, PRMT5, SEMA4D, PRDX4, FERMT2, CD300A, DKK1, APPL1, DNAJA4, RETN, VSIR, LNPK, ZFYVE27, MTPN, RFLNB
Cluster 2	1h post exercise	BP	GO:0051239	regulation of multicellular organismal process	100	0.421049	1.89639	2.94664e-05	0.00126706	0.00102834	145	tags=50%, list=31%, signal=44%	CTSG, ELANE, BST1, VCAN, S100A9, CR1, SIRPA, DLG4, FCN1, CST3, SEMA4A, LRP1, PLSCR1, ORM2, ATRN, CD14, ECM1, TIMP1, THBS4, FN1, HSPG2, TPM1, SPARC, TNFSF13, ENG, TGFB1, CD226, CD36, GP1BB, ACP3, IL6ST, SERPINE1, MDK, PDGFC, LAMA4, ITGAV, F12, ITGA5, PLPP6, ARSB, GLIPR2, AGRN, SOD1, PDGFA, F11R, KLKB1, HTRA2, HRG, CHSY1, CD47	ACP3, ALDH1A1, ARRB1, ARSB, BRAF, BST1, C3, C5, CALR, CD14, CD36, CD47, SEPTIN7, CPT2, CR1, VCAN, CST3, CTSG, DLG4, ECM1, ELANE, ENG, ENO1, F12, ACSL1, FCN1, FN1, GDI1, GP1BB, GPI, GSTP1, HRG, HSPG2, IL6ST, ITGA2, ITGA5, ITGAV, KLKB1, LAMA4, LRP1, MAN2A1, MDK, PNP, ORM2, PAFAH1B1, SERPINE1, PDGFA, PFN1, PLSCR1, PPP2CA, PRKAA1, PRKCB, MAPK1, PROS1, ROCK1, S100A9, SOD1, SPARC, ADAM17, TBXAS1, TGFB1…
Cluster 1	1h post exercise	BP	GO:0032496	response to lipopolysaccharide	13	0.791332	2.32947	1.60003e-06	6.92911e-05	5.80611e-05	27	tags=62%, list=10%, signal=58%	DEFA3, MMP9, LTF, CAMP, BPI, MMP8, CD55, CXCL2	BPI, CAMP, CD40, CD55, DEFA3, CXCL2, LTF, MMP8, MMP9, PTGIR, UPF1, SLC7A5, PRDX3
Cluster 2	1h post exercise	BP	GO:0032496	response to lipopolysaccharide	17	0.655479	2.33777	6.59921e-05	0.00216998	0.00176115	95	tags=65%, list=20%, signal=54%	CTSG, ELANE, MPO, S100A9, SIRPA, S100A8, CD14, CXCL3, PLSCR3, CD36, SERPINE1	ADH5, ALAD, CD14, CD36, CNP, CTSG, ELANE, CXCL3, GSTP1, MPO, SERPINE1, MAPK1, S100A8, S100A9, ADAM17, PLSCR3, SIRPA
Cluster 1	1h post exercise	CC	GO:0030141	secretory granule	47	0.660623	2.28557	4.91615e-09	3.4708e-06	2.90829e-06	39	tags=47%, list=14%, signal=48%	DEFA3, MMP9, LTF, LCN2, C1orf35, CAMP, BST2, AZU1, BPI, MMP8, STBD1, RETN, CFP, CD55, MYH9, SIRPB1, RNASE3, RAB3A, ORM1, PDGFB, ANXA3, S100A12	ADAM10, ALB, ANXA3, AZU1, B2M, BPI, BST2, CAMP, CDC42, CD55, DEFA3, FTH1, GNAI2, ITGB3, LAMP1, LAMP2, LCN2, LGALS3BP, LTF, CD46, MMP8, MMP9, MYH9, ORM1, PAFAH1B2, PDGFB, CFP, PLD1, RAB3A, RNASE3, S100A12, TF, VCP, CPNE3, STBD1, ARPC5, SIRPB1, PRDX4, SLC27A2, CD300A, TMC6, ERP44, SNAPIN, YPEL5, RETN, C1orf35, TXNDC5
Cluster 2	Post exercise	CC	GO:0030141	secretory granule	112	-0.520536	-1.64459	9.51738e-06	0.00510013	0.00479233	121	tags=45%, list=26%, signal=44%	ELANE, RAP1B, PROS1, GGH, NCSTN, FAM3C, CD109, RAB10, GCA, TIMP1, TGFB1, FUCA2, SLC18A2, CTSG, C3, QSOX1, APLP2, LILRA3, SPARC, ITIH4, MCEMP1, HRG, SERPINE1, S100A9, SIGLEC9, SELENOP, MAGT1, CST3, RAB31, CDA, B4GALT1, HYAL3, MGST1, PDGFA, RNASE2, CD14, CR1, PRTN3, ALDH3B1, ARSB, CTSZ, ACP3, ANPEP, CTSB, LYZ, MPO, CFD, OSCAR, SIRPA, FCN1	A1BG, ACLY, ACP3, ALAD, ALDH3B1, ALDOA, ANPEP, APEH, APLP2, ARSB, ATP6V0A1, BSG, BST1, C3, CALR, CAT, CD14, CD36, CD47, CDA, CR1, CST3, CTSB, CTSG, CTSZ, CFD, CYB5R3, DLD, ECM1, ELANE, STOM, FCN1, FN1, FUCA2, GDI2, B4GALT1, GM2A, GNS, GPI, GSTP1, HP, HRG, ITGA2B, ITGAM, ITGAV, ITIH3, ITIH4, LYZ, MAN2B1, MGST1, MPO, PNP, ORM2, SERPINE1, PDGFA, PECAM1, PGAM1, PGM1, PPIA, MAPK1, PROS1, PRTN3, PSMA2,…
Cluster 2	1h post exercise	CC	GO:0030141	secretory granule	112	0.462162	2.0888	5.15117e-07	9.59835e-05	7.79002e-05	135	tags=50%, list=29%, signal=47%	CTSG, PRTN3, ELANE, BST1, MPO, LILRA3, LYZ, OSCAR, CD93, CDA, MCEMP1, S100A9, CR1, ANPEP, SIRPA, S100A8, FCN1, CST3, GCA, CFD, ORM2, SIGLEC9, ITGAM, MGST1, CD14, ECM1, HP, TIMP1, RNASE2, FN1, A1BG, GM2A, SPARC, QSOX1, TGFB1, CD36, ACP3, SERPINE1, ALDH3B1, TMEM30A, HYAL3, ITGAV, CTSZ, SELENOP, VWF, ARSB, FAM3C, ALAD, PDGFA, PGAM1, APLP2, ITIH4, NCSTN, VAT1, DNAJC5, SLC44A2	A1BG, ACLY, ACP3, ALAD, ALDH3B1, ALDOA, ANPEP, APEH, APLP2, ARSB, ATP6V0A1, BSG, BST1, C3, CALR, CAT, CD14, CD36, CD47, CDA, CR1, CST3, CTSB, CTSG, CTSZ, CFD, CYB5R3, DLD, ECM1, ELANE, STOM, FCN1, FN1, FUCA2, GDI2, B4GALT1, GM2A, GNS, GPI, GSTP1, HP, HRG, ITGA2B, ITGAM, ITGAV, ITIH3, ITIH4, LYZ, MAN2B1, MGST1, MPO, PNP, ORM2, SERPINE1, PDGFA, PECAM1, PGAM1, PGM1, PPIA, MAPK1, PROS1, PRTN3, PSMA2,…
Cluster 1	1h post exercise	CC	GO:0034774	secretory granule lumen	24	0.726091	2.33004	8.96616e-08	1.20107e-05	1.00641e-05	39	tags=58%, list=14%, signal=55%	DEFA3, LTF, LCN2, C1orf35, CAMP, AZU1, BPI, MMP8, RETN, CFP, RNASE3, ORM1, PDGFB, S100A12	ALB, AZU1, B2M, BPI, CAMP, DEFA3, LCN2, LGALS3BP, LTF, MMP8, ORM1, PAFAH1B2, PDGFB, CFP, RNASE3, S100A12, TF, VCP, ARPC5, PRDX4, ERP44, RETN, C1orf35, TXNDC5
Cluster 2	1h post exercise	CC	GO:0034774	secretory granule lumen	58	0.523867	2.23254	1.42891e-06	0.000122886	9.97343e-05	130	tags=59%, list=28%, signal=48%	CTSG, PRTN3, ELANE, MPO, LYZ, OSCAR, CDA, S100A9, S100A8, FCN1, GCA, CFD, ORM2, ECM1, HP, TIMP1, RNASE2, FN1, A1BG, GM2A, SPARC, QSOX1, TGFB1, SERPINE1, CTSZ, SELENOP, VWF, ARSB, FAM3C, ALAD, PDGFA, PGAM1, ITIH4, VAT1	A1BG, ACLY, ALAD, ALDOA, ARSB, C3, CAT, CDA, CTSG, CTSZ, CFD, CYB5R3, ECM1, ELANE, FCN1, FN1, FUCA2, GDI2, GM2A, GNS, GPI, GSTP1, HP, HRG, ITIH3, ITIH4, LYZ, MAN2B1, MPO, PNP, ORM2, SERPINE1, PDGFA, PGAM1, PPIA, MAPK1, PROS1, PRTN3, PSMA2, PSMB1, PSMB7, QSOX1, RNASE2, ROCK1, S100A8, S100A9, SELENOP, SPARC, TGFB1, TIMP1, VWF, GGH, FAM3C, VAT1, GCA, OLA1, TOLLIP, OSCAR
Cluster 1	1h post exercise	CC	GO:0099503	secretory vesicle	52	0.626232	2.18626	2.42724e-08	8.56816e-06	7.17952e-06	39	tags=42%, list=14%, signal=45%	DEFA3, MMP9, LTF, LCN2, C1orf35, CAMP, BST2, AZU1, BPI, MMP8, STBD1, RETN, CFP, CD55, MYH9, SIRPB1, RNASE3, RAB3A, ORM1, PDGFB, ANXA3, S100A12	ADAM10, ALB, ANXA3, ATP6AP1, AZU1, B2M, BPI, BST2, CAMP, CDC42, CLTA, CD55, DEFA3, FTH1, GNAI2, ITGB3, LAMP1, LAMP2, LCN2, LGALS3BP, LTF, CD46, MMP8, MMP9, MYH9, ORM1, PAFAH1B2, PDGFB, CFP, PLD1, RAB3A, RNASE3, S100A12, TF, VCP, CPNE3, STBD1, ARPC5, SIRPB1, PRDX4, SLC27A2, CD300A, TMC6, ERP44, SEPTIN6, SNAPIN, STX12, YPEL5, RETN, MFF, C1orf35, TXNDC5
Cluster 2	Post exercise	CC	GO:0099503	secretory vesicle	122	-0.51243	-1.62333	8.26695e-06	0.00510013	0.00479233	121	tags=43%, list=26%, signal=44%	ELANE, RAP1B, PROS1, GGH, NCSTN, FAM3C, SYNGR2, CD109, RAB10, GCA, TIMP1, TGFB1, FUCA2, SLC18A2, CTSG, C3, QSOX1, APLP2, LILRA3, SPARC, ITIH4, MCEMP1, HRG, SERPINE1, S100A9, SIGLEC9, SELENOP, MAGT1, CST3, RAB31, CDA, B4GALT1, HYAL3, MGST1, PDGFA, RNASE2, CD14, DLG4, CR1, PRTN3, ALDH3B1, ARSB, DYSF, CTSZ, ACP3, ANPEP, CTSB, LYZ, MPO, CFD, OSCAR, SIRPA, FCN1	A1BG, ACLY, ACP3, ALAD, ALDH3B1, ALDOA, ANPEP, APEH, APLP2, ARSB, ATP6V0A1, BSG, BST1, C3, CALR, CAT, CD14, CD36, CD47, CDA, CR1, CST3, CTSB, CTSG, CTSZ, CFD, CYB5R3, DLD, DLG4, ECM1, ELANE, STOM, FCN1, FN1, FUCA2, GDI2, B4GALT1, GM2A, GNS, GPI, GSTP1, HP, HRG, ITGA2B, ITGAM, ITGAV, ITIH3, ITIH4, LYZ, MAN2B1, MGST1, MPO, SEPTIN2, PNP, ORM2, SERPINE1, PDGFA, PECAM1, PGAM1, PGM1, PPIA, MAPK1, PROS1…
Cluster 2	1h post exercise	CC	GO:0099503	secretory vesicle	122	0.450852	2.05733	3.79142e-07	8.47761e-05	6.88043e-05	135	tags=48%, list=29%, signal=47%	CTSG, PRTN3, ELANE, BST1, MPO, LILRA3, LYZ, OSCAR, CD93, CDA, MCEMP1, S100A9, CR1, ANPEP, SIRPA, S100A8, DLG4, FCN1, CST3, GCA, CFD, ORM2, DYSF, SIGLEC9, ITGAM, MGST1, CD14, ECM1, HP, TIMP1, RNASE2, FN1, A1BG, GM2A, SPARC, QSOX1, TGFB1, CD36, ACP3, SERPINE1, ALDH3B1, TMEM30A, HYAL3, ITGAV, CTSZ, SELENOP, VWF, ARSB, FAM3C, SYNGR2, ALAD, PDGFA, PGAM1, APLP2, ITIH4, NCSTN, VAT1, DNAJC5, SLC44A2	A1BG, ACLY, ACP3, ALAD, ALDH3B1, ALDOA, ANPEP, APEH, APLP2, ARSB, ATP6V0A1, BSG, BST1, C3, CALR, CAT, CD14, CD36, CD47, CDA, CR1, CST3, CTSB, CTSG, CTSZ, CFD, CYB5R3, DLD, DLG4, ECM1, ELANE, STOM, FCN1, FN1, FUCA2, GDI2, B4GALT1, GM2A, GNS, GPI, GSTP1, HP, HRG, ITGA2B, ITGAM, ITGAV, ITIH3, ITIH4, LYZ, MAN2B1, MGST1, MPO, SEPTIN2, PNP, ORM2, SERPINE1, PDGFA, PECAM1, PGAM1, PGM1, PPIA, MAPK1, PROS1…
Cluster 1	1h post exercise	CC	GO:0042581	specific granule	15	0.710884	2.12516	7.95287e-05	0.00200526	0.00168027	38	tags=60%, list=14%, signal=55%	LTF, LCN2, CAMP, BPI, MMP8, RETN, CFP, ORM1, ANXA3	ADAM10, ANXA3, B2M, BPI, CAMP, LCN2, LTF, MMP8, ORM1, CFP, PLD1, SLC27A2, TMC6, ERP44, RETN
Cluster 2	1h post exercise	CC	GO:0042581	specific granule	29	0.540327	2.11849	0.000207455	0.00504205	0.00409213	161	tags=72%, list=34%, signal=51%	ELANE, BST1, LILRA3, LYZ, OSCAR, CD93, MCEMP1, ORM2, ITGAM, HP, QSOX1, CD36, ALDH3B1, TMEM30A, ITGAV, CTSZ, DNAJC5, SLC44A2, CD47, STOM, TSPAN14	ALDH3B1, BST1, CD36, CD47, CTSZ, ELANE, STOM, HP, ITGAM, ITGAV, LYZ, ORM2, QSOX1, GGH, AP1M1, MLEC, LILRA3, CD93, ATP11A, ATP6V1D, TOLLIP, TMEM30A, SLC44A2, DNAJC5, TSPAN14, OSCAR, MOSPD2, ANO6, MCEMP1
Cluster 1	1h post exercise	CC	GO:0070820	tertiary granule	17	0.627932	1.92388	0.00177639	0.0236628	0.0198278	56	tags=59%, list=20%, signal=50%	MMP9, LTF, CAMP, MMP8, STBD1, CFP, CD55, ORM1, CD300A, PLD1	ADAM10, B2M, CAMP, CD55, FTH1, LAMP1, LAMP2, LTF, MMP8, MMP9, ORM1, CFP, PLD1, STBD1, CD300A, TMC6, YPEL5
Cluster 2	1h post exercise	CC	GO:0070820	tertiary granule	21	0.609521	2.25916	9.30653e-05	0.00266787	0.00216524	78	tags=57%, list=17%, signal=50%	LILRA3, LYZ, OSCAR, CD93, CDA, MCEMP1, CR1, SIRPA, CST3, ITGAM, HP, QSOX1	ALDOA, ATP6V0A1, CD47, CDA, CR1, CST3, STOM, HP, ITGAM, LYZ, PGM1, QSOX1, GGH, LILRA3, CD93, ATP11A, TSPAN14, OSCAR, SIRPA, ANO6, MCEMP1
Cluster 1	1h post exercise	CC	GO:0031983	vesicle lumen	24	0.726091	2.33004	8.96616e-08	1.20107e-05	1.00641e-05	39	tags=58%, list=14%, signal=55%	DEFA3, LTF, LCN2, C1orf35, CAMP, AZU1, BPI, MMP8, RETN, CFP, RNASE3, ORM1, PDGFB, S100A12	ALB, AZU1, B2M, BPI, CAMP, DEFA3, LCN2, LGALS3BP, LTF, MMP8, ORM1, PAFAH1B2, PDGFB, CFP, RNASE3, S100A12, TF, VCP, ARPC5, PRDX4, ERP44, RETN, C1orf35, TXNDC5
Cluster 2	1h post exercise	CC	GO:0031983	vesicle lumen	58	0.523867	2.23254	1.42891e-06	0.000122886	9.97343e-05	130	tags=59%, list=28%, signal=48%	CTSG, PRTN3, ELANE, MPO, LYZ, OSCAR, CDA, S100A9, S100A8, FCN1, GCA, CFD, ORM2, ECM1, HP, TIMP1, RNASE2, FN1, A1BG, GM2A, SPARC, QSOX1, TGFB1, SERPINE1, CTSZ, SELENOP, VWF, ARSB, FAM3C, ALAD, PDGFA, PGAM1, ITIH4, VAT1	A1BG, ACLY, ALAD, ALDOA, ARSB, C3, CAT, CDA, CTSG, CTSZ, CFD, CYB5R3, ECM1, ELANE, FCN1, FN1, FUCA2, GDI2, GM2A, GNS, GPI, GSTP1, HP, HRG, ITIH3, ITIH4, LYZ, MAN2B1, MPO, PNP, ORM2, SERPINE1, PDGFA, PGAM1, PPIA, MAPK1, PROS1, PRTN3, PSMA2, PSMB1, PSMB7, QSOX1, RNASE2, ROCK1, S100A8, S100A9, SELENOP, SPARC, TGFB1, TIMP1, VWF, GGH, FAM3C, VAT1, GCA, OLA1, TOLLIP, OSCAR
Cluster 1	1h post exercise	MF	GO:0008270	zinc ion binding	13	0.653036	1.92236	0.00153708	0.0212781	0.0178295	47	tags=54%, list=17%, signal=47%	MMP9, RNF7, MMP8, S100A12, NT5E, ZNF146, ZMYM3	GLO1, MMP8, MMP9, NT5E, UPF1, S100A12, ZNF146, ZMYM3, RNF7, LANCL1, ATP13A2, CZIB, ZDHHC20
Cluster 2	1h post exercise	MF	GO:0008270	zinc ion binding	22	0.517333	1.93987	0.00360732	0.0387786	0.0314727	140	tags=64%, list=30%, signal=47%	FBXO30, CDA, S100A9, ANPEP, S100A8, CPXM1, CPM, PLSCR1, TIMP1, SOD1, ALAD, VAT1, LACTB2, HRG	ADH5, ALAD, ANPEP, CALR, CDA, CPM, DCTD, HRG, IDE, PLSCR1, PRKCB, S100A8, S100A9, SOD1, TARS1, TIMP1, VAT1, PLA2G15, LACTB2, CPXM1, FBXO30, TRAF7
Cluster 1	1h post exercise	BP	GO:0051240	positive regulation of multicellular organismal process	37	0.539246	1.80489	0.000554114	0.0093144	0.00780482	69	tags=51%, list=25%, signal=45%	LTF, LCN2, CAMP, AZU1, MMP8, RETN, CD55, TLR1, SIRPB1, ORM1, PDGFB, ANXA3, CD101, FERMT2, CD40, DKK1, SLC7A1, TF, VIL1	ANXA3, AZU1, B2M, CAMP, CD40, CD55, DDT, ITGB1, ITGB3, LCN2, LTF, CD46, MMP8, NRDC, ORM1, P2RY1, PDGFB, PPIB, PPP1CC, SLC7A1, TF, TLR1, VIL1, SLC7A5, SEMA7A, CD101, GSTO1, SIRPB1, PRMT5, SEMA4D, FERMT2, DKK1, APPL1, RETN, VSIR, ZFYVE27, MTPN
Cluster 2	1h post exercise	BP	GO:0051240	positive regulation of multicellular organismal process	59	0.458426	1.95562	0.000157576	0.00400385	0.00324952	118	tags=49%, list=25%, signal=42%	ELANE, BST1, VCAN, CR1, SIRPA, FCN1, SEMA4A, LRP1, ORM2, CD14, ECM1, FN1, TPM1, TNFSF13, ENG, TGFB1, CD226, CD36, GP1BB, IL6ST, SERPINE1, MDK, PDGFC, F12, ITGA5, PLPP6, GLIPR2, AGRN, SOD1	BRAF, BST1, C3, C5, CD14, CD36, CD47, CPT2, CR1, VCAN, ECM1, ELANE, ENG, ENO1, F12, ACSL1, FCN1, FN1, GDI1, GP1BB, HRG, IL6ST, ITGA2, ITGA5, LRP1, MAN2A1, MDK, PNP, ORM2, PAFAH1B1, SERPINE1, PRKAA1, PRKCB, ROCK1, SOD1, ADAM17, TBXAS1, TGFB1, TPM1, YES1, TNFSF13, CD226, TMED10, RAB21, DICER1, PLXNB2, IL17RA, RAB8B, INPP5K, MYDGF, PDGFC, RTN4, CARD9, SEMA4A, SIRPA, GLIPR2, ANO6, AGRN, PLPP6
Cluster 1	1h post exercise	BP	GO:0006950	response to stress	89	0.455106	1.66125	0.000508321	0.00897186	0.0075178	79	tags=42%, list=28%, signal=44%	DEFA3, MMP9, LTF, LCN2, CAMP, BST2, AZU1, BPI, MMP8, CFP, CD55, TLR1, MYH9, CXCL2, RNASE3, TELO2, RAB3A, DGKH, ORM1, PDGFB, ANXA3, S100A12, NT5E, RAF1, PLGRKT, CD300A, FERMT2, PTGIR, CD40, FXN, TF, VIL1, SERINC3, ALB, CFI, GNG7, SEMA7A	ALB, ANXA3, APCS, APOD, AZU1, B2M, BPI, BST2, C6, C7, CAMP, CASP2, CD40, CDC42, CD55, DDT, DEFA3, FXN, GMPR, GNG7, GRB2, CXCL2, DNAJA1, CFI, IGBP1, IGHG1, ITGB1, ITGB3, LAMP1, LAMP2, LCN2, LGALS3BP, LGALS8, LTF, CD46, MMP8, MMP9, MYH9, NT5E, ORM1, P2RY1, PDGFB, CFP, PSMA6, PTGIR, RAB3A, RAD23A, RAF1, UPF1, RNASE3, S100A12, PPP1R11, TF, TLR1, UBE2V1, UFD1, VCP, VIL1, MANF, SLC7A5, SEMA7A, DEPDC5, …
Cluster 2	1h post exercise	BP	GO:0006950	response to stress	138	0.435309	2.00863	1.03532e-06	0.000115749	9.39418e-05	158	tags=52%, list=34%, signal=49%	CTSG, PRTN3, ELANE, BST1, MPO, LYZ, S100A9, PADI4, CR1, SIRPA, S100A8, FCN1, CST3, LRP1, WRAP53, PLSCR1, MPV17, CFD, ORM2, ATRN, ITGAM, MGST1, CD14, ECM1, HP, CXCL3, TIMP1, RNASE2, THBS4, FN1, HSPG2, TPM1, ERLIN1, FCGR1A, HPX, CFHR1, TGFB1, CD226, CD36, GP1BB, TPT1, IL6ST, SERPINE1, MDK, ALDH3B1, HYAL3, CLEC1B, ITGAV, F12, ITGA5, PLPP6, SELENOP, VWF, SOD1, ALAD, TXN, PDGFA, ITIH4, F11R, KLKB1, HT…	ACADVL, ADH5, ALAD, ALDH3B1, BRAF, BST1, C3, C4A, C5, C8G, CALR, CASP6, CAT, CD14, CD36, CD47, CR1, CST3, CTSG, CFD, DYRK1A, ECM1, ELANE, ENO1, ETFDH, F12, FCGR1A, FCN1, FN1, B4GALT1, GP1BB, GPI, GPX4, CXCL3, GSR, GSS, GSTP1, CFHR1, HP, HPX, HRG, HSPG2, IL6ST, ITGA2, ITGA5, ITGAM, ITGAV, ITIH4, KLKB1, LRP1, LYZ, MDK, MGST1, MPO, MPV17, NFE2, ORM2, PRDX1, SERPINE1, PDGFA, PLSCR1, PPIA, PPP2CA, PRK…

## Sheet: GSEA overlap cluster 2 & 3
Cluster	Timepoint	ONTOLOGY	ID	Description	setSize	enrichmentScore	NES	pvalue	p.adjust	qvalue	rank	leading_edge	core_enrichment	annotated_proteins
Cluster 2	Post exercise	CC	GO:0009986	cell surface	46	-0.558605	-1.66809	0.000344049	0.0299801	0.0281707	134	tags=54%, list=29%, signal=43%	CD93, ADAM17, RALA, ELANE, CPM, CD109, SORT1, IL6ST, TGFB1, C3, SPARC, HRG, B4GALT1, PDGFA, CD14, CR1, AZGP1, ARSB, ANPEP, CTSB, FCGRT, CSF2RA, SIRPA, FCN1, FCGR1A	ANPEP, ARSB, AZGP1, C3, CALR, CD14, CD36, CD47, CPM, CR1, CSF2RA, CTSB, ELANE, ENG, ENO1, FCGR1A, FCGRT, FCN1, B4GALT1, GSR, HRG, IDE, IL6ST, ITGA2, ITGA2B, ITGA5, ITGAM, ITGAV, PDGFA, PECAM1, RALA, SORT1, SLC3A2, SPARC, ADAM17, TGFB1, CD226, CD93, TSPAN15, PLXNB2, CLEC1B, PDGFC, TSPAN14, CD109, SIRPA, ANO6
Cluster 2	1h post exercise	CC	GO:0009986	cell surface	46	0.498923	2.06798	4.8549e-05	0.0017509	0.00142103	193	tags=78%, list=41%, signal=51%	ELANE, CD93, CR1, CSF2RA, AZGP1, ANPEP, SIRPA, FCN1, CPM, FCGRT, ITGAM, CD14, FCGR1A, SPARC, ENG, TGFB1, CD226, CD36, IL6ST, PDGFC, CLEC1B, ITGAV, ITGA5, ARSB, TSPAN15, PDGFA, HRG, CD47, SORT1, TSPAN14, CTSB, CD109, B4GALT1, ITGA2, ITGA2B, C3	ANPEP, ARSB, AZGP1, C3, CALR, CD14, CD36, CD47, CPM, CR1, CSF2RA, CTSB, ELANE, ENG, ENO1, FCGR1A, FCGRT, FCN1, B4GALT1, GSR, HRG, IDE, IL6ST, ITGA2, ITGA2B, ITGA5, ITGAM, ITGAV, PDGFA, PECAM1, RALA, SORT1, SLC3A2, SPARC, ADAM17, TGFB1, CD226, CD93, TSPAN15, PLXNB2, CLEC1B, PDGFC, TSPAN14, CD109, SIRPA, ANO6
Cluster 3	1h post exercise	CC	GO:0009986	cell surface	12	-0.671552	-2.04209	0.000468457	0.0152616	0.0136345	54	tags=75%, list=16%, signal=65%	HSPD1, ATP5F1B, ITGB7, HLA-E, CX3CR1, PHB1, HLA-F, TRGC1, FCGR3A	ATP5F1A, ATP5F1B, CAPN2, CX3CR1, FCGR3A, HLA-E, HLA-F, HSPD1, ITGB7, NCAM1, PHB1, TRGC1
Cluster 2	1h post exercise	BP	GO:0098609	cell-cell adhesion	30	0.535909	2.10997	0.000153041	0.00397907	0.00322941	108	tags=57%, list=23%, signal=47%	CTSG, ELANE, CD93, S100A9, CR1, ADD2, SIRPA, S100A8, DLG4, ITGAM, THBS4, ESAM, TGFB1, IL6ST, MDK, ITGAV, ITGA5	ADD2, CD47, CR1, CTSG, DLG4, ELANE, IL6ST, ITGA2, ITGA2B, ITGA5, ITGAM, ITGAV, LAMB1, MDK, PNP, PECAM1, PPIA, ROCK1, S100A8, S100A9, TGFB1, THBS4, YES1, PIEZO1, RAB10, CD93, PLXNB2, F11R, ESAM, SIRPA
Cluster 3	1h post exercise	BP	GO:0098609	cell-cell adhesion	16	-0.653571	-2.15147	0.00016109	0.00785316	0.00701591	84	tags=75%, list=25%, signal=59%	IL4I1, HSPD1, RAC2, RASAL3, ITGB7, HLA-E, CX3CR1, LCK, RUNX1, TBX21, ZAP70, RUNX3	RUNX1, RUNX3, CX3CR1, HLA-E, HSPD1, ITGB7, LCK, RAC2, SMARCC2, ZAP70, CHST2, CYFIP2, TBX21, CYRIB, RASAL3, IL4I1
Cluster 2	1h post exercise	BP	GO:0002252	immune effector process	33	0.565118	2.26509	2.1642e-05	0.000967829	0.00078549	96	tags=58%, list=21%, signal=49%	CTSG, ELANE, MPO, S100A9, CR1, FCN1, SEMA4A, LRP1, CFD, DYSF, ITGAM, FCGR1A, HPX, TNFSF13, CFHR1, TGFB1, CD226, CD36, MDK	C3, C4A, C5, C8G, CD36, CR1, CTSG, CFD, ELANE, FCGR1A, FCN1, GPI, CFHR1, HPRT1, HPX, IGKC, IGLC2, ITGAM, LRP1, MDK, MPO, PRDX1, S100A9, SLC18A2, ADAM17, TGFB1, TSC1, YES1, DYSF, TNFSF13, CD226, CARD9, SEMA4A
Cluster 3	1h post exercise	BP	GO:0002252	immune effector process	26	-0.618895	-2.28622	6.74824e-06	0.000877271	0.000783743	36	tags=46%, list=11%, signal=45%	HLA-E, CX3CR1, PHB1, HLA-F, TBX21, FCGR3A, STAT4, GZMM, SH2D1B, GZMB, PRF1, STAP1	CTSC, CX3CR1, FCGR3A, GNL1, GZMB, GZMM, HLA-E, HLA-F, HSPD1, INPP5D, SH2D1A, PHB1, PRF1, PKN1, RAC2, STAT4, TAP2, RFTN1, STAP1, LAT, TBX21, CYRIB, DDX60, MYO1G, SH2D1B, IL4I1
Cluster 2	1h post exercise	BP	GO:0007159	leukocyte cell-cell adhesion	16	0.603731	2.12871	0.00129778	0.019607	0.015913	30	tags=44%, list=6%, signal=42%	CTSG, ELANE, S100A9, CR1, ADD2, SIRPA, S100A8	ADD2, CD47, CR1, CTSG, ELANE, IL6ST, ITGA5, MDK, PNP, PECAM1, ROCK1, S100A8, S100A9, YES1, F11R, SIRPA
Cluster 3	1h post exercise	BP	GO:0007159	leukocyte cell-cell adhesion	15	-0.692836	-2.24367	2.93503e-05	0.00286166	0.00255657	84	tags=80%, list=25%, signal=63%	IL4I1, HSPD1, RAC2, RASAL3, ITGB7, HLA-E, CX3CR1, LCK, RUNX1, TBX21, ZAP70, RUNX3	RUNX1, RUNX3, CX3CR1, HLA-E, HSPD1, ITGB7, LCK, RAC2, SMARCC2, ZAP70, CHST2, TBX21, CYRIB, RASAL3, IL4I1
Cluster 2	1h post exercise	BP	GO:0050900	leukocyte migration	32	0.46014	1.83238	0.00487071	0.0484964	0.0393597	65	tags=34%, list=14%, signal=32%	CTSG, PRTN3, ELANE, BST1, S100A9, ADD2, SIRPA, S100A8, ECM1, CXCL3, THBS4	ADD2, BSG, BST1, C5, CALR, CD47, CTSG, ECM1, ELANE, B4GALT1, CXCL3, ITGA2, ITGA2B, MDK, PAFAH1B1, SERPINE1, PECAM1, PPIA, MAPK1, PRTN3, ROCK1, S100A8, S100A9, ADAM17, THBS4, YES1, IL17RA, F11R, PDGFD, SIRPA, MOSPD2, ANO6
Cluster 3	1h post exercise	BP	GO:0050900	leukocyte migration	11	-0.664714	-1.97283	0.000879825	0.0180596	0.0161342	60	tags=64%, list=18%, signal=54%	RAC2, ITGB7, CX3CR1, LCK, TBX21, ZAP70, STAP1	CX3CR1, IL16, ITGB7, LCK, RAC2, ZAP70, CHST2, STAP1, STK39, TBX21, MYO1G
Cluster 2	1h post exercise	BP	GO:0050867	positive regulation of cell activation	13	0.643249	2.16605	0.00100325	0.0167409	0.0135869	109	tags=77%, list=23%, signal=61%	BST1, CR1, SIRPA, TNFSF13, TGFB1, CD226, GP1BB, IL6ST, MDK, PLPP6	BST1, CD47, CR1, GP1BB, IL6ST, MDK, PNP, TGFB1, YES1, TNFSF13, CD226, SIRPA, PLPP6
Cluster 3	1h post exercise	BP	GO:0050867	positive regulation of cell activation	16	-0.640411	-2.10815	0.000288635	0.0117834	0.0105272	84	tags=69%, list=25%, signal=54%	IL4I1, HSPD1, RASAL3, HLA-E, LCK, RUNX1, TBX21, ZAP70, FCGR3A, RUNX3, STAP1	RUNX1, RUNX3, CTSC, FCGR3A, HLA-E, HSPD1, INPP5D, LCK, NFATC2, SMARCC2, ZAP70, STAP1, TBX21, CYRIB, RASAL3, IL4I1
Cluster 2	1h post exercise	BP	GO:0002699	positive regulation of immune effector process	12	0.674963	2.23789	0.000645701	0.0118343	0.00960474	87	tags=75%, list=19%, signal=63%	CR1, FCN1, ITGAM, FCGR1A, HPX, TNFSF13, TGFB1, CD226, CD36	C3, CD36, CR1, FCGR1A, FCN1, GPI, HPX, ITGAM, TGFB1, TNFSF13, CD226, CARD9
Cluster 3	1h post exercise	BP	GO:0002699	positive regulation of immune effector process	11	-0.680335	-2.01919	0.000469587	0.0152616	0.0136345	80	tags=73%, list=24%, signal=57%	HSPD1, SH2D1A, HLA-E, PHB1, HLA-F, TBX21, SH2D1B, STAP1	HLA-E, HLA-F, HSPD1, SH2D1A, PHB1, TAP2, STAP1, TBX21, CYRIB, DDX60, SH2D1B
Cluster 2	1h post exercise	BP	GO:0002684	positive regulation of immune system process	52	0.46158	1.94454	0.000218791	0.00509601	0.00413592	96	tags=44%, list=21%, signal=40%	CTSG, ELANE, BST1, S100A9, CR1, SIRPA, S100A8, FCN1, PLSCR1, CFD, ITGAM, CD14, THBS4, FCGR1A, HPX, TNFSF13, CFHR1, TGFB1, CD226, CD36, IL6ST, SERPINE1, MDK	BRAF, BST1, C3, C4A, C5, C8G, CALR, CASP6, CD14, CD36, CD47, CR1, CTSG, CFD, ELANE, FCGR1A, FCN1, GPI, CFHR1, HPX, HRG, IGKC, IL6ST, ITGA2, ITGA2B, ITGAM, MDK, PNP, SERPINE1, PLSCR1, PPP2CA, PRKCB, MAPK1, S100A8, S100A9, ADAM17, TGFB1, THBS4, YES1, YWHAE, TNFSF13, USP15, CD226, GPR108, RTN4, CARD9, PDGFD, CLPB, SIRPA, MOSPD2, ANO6, PLPP6
Cluster 3	1h post exercise	BP	GO:0002684	positive regulation of immune system process	49	-0.491822	-2.02995	4.16862e-05	0.00309561	0.00276558	84	tags=49%, list=25%, signal=43%	IL4I1, HSPD1, GBP5, SH2D1A, HCLS1, RAC2, RASAL3, PAK2, NLRC3, HLA-E, CX3CR1, PHB1, LCK, HLA-F, RUNX1, TRGC1, TBX21, CD247, PYHIN1, ZAP70, FCGR3A, SH2D1B, RUNX3, STAP1	CASP8, RUNX1, RUNX3, CD247, CTSC, CX3CR1, DDX3X, FCGR3A, GBP1, GBP2, HCLS1, HLA-E, HLA-F, HSPD1, INPP5D, LCK, SH2D1A, NFATC2, PAK2, PCBP2, PHB1, PRKCH, RAC2, RPS6KA3, SMARCC2, TAP2, TRGC1, ZAP70, RAB29, MATR3, RBM14, RFTN1, PRKD2, STAP1, LAT, STK39, TBK1, TBX21, CYRIB, DDX60, ERBIN, MYO1G, RASAL3, TRAF3IP3, GBP5, SH2D1B, PYHIN1, NLRC3, IL4I1
Cluster 2	1h post exercise	BP	GO:0002696	positive regulation of leukocyte activation	12	0.630922	2.09187	0.0022384	0.0293779	0.0238431	109	tags=75%, list=23%, signal=59%	BST1, CR1, SIRPA, TNFSF13, TGFB1, CD226, IL6ST, MDK, PLPP6	BST1, CD47, CR1, IL6ST, MDK, PNP, TGFB1, YES1, TNFSF13, CD226, SIRPA, PLPP6
Cluster 3	1h post exercise	BP	GO:0002696	positive regulation of leukocyte activation	16	-0.640411	-2.10815	0.000288635	0.0117834	0.0105272	84	tags=69%, list=25%, signal=54%	IL4I1, HSPD1, RASAL3, HLA-E, LCK, RUNX1, TBX21, ZAP70, FCGR3A, RUNX3, STAP1	RUNX1, RUNX3, CTSC, FCGR3A, HLA-E, HSPD1, INPP5D, LCK, NFATC2, SMARCC2, ZAP70, STAP1, TBX21, CYRIB, RASAL3, IL4I1
Cluster 2	1h post exercise	BP	GO:0051251	positive regulation of lymphocyte activation	10	0.630136	2.00077	0.00427583	0.0442627	0.0359236	96	tags=70%, list=21%, signal=57%	BST1, CR1, SIRPA, TNFSF13, TGFB1, IL6ST, MDK	BST1, CD47, CR1, IL6ST, MDK, PNP, TGFB1, YES1, TNFSF13, SIRPA
Cluster 3	1h post exercise	BP	GO:0051251	positive regulation of lymphocyte activation	14	-0.637006	-2.02509	0.000704284	0.0173006	0.0154561	84	tags=71%, list=25%, signal=56%	IL4I1, HSPD1, RASAL3, HLA-E, LCK, RUNX1, TBX21, ZAP70, FCGR3A, RUNX3	RUNX1, RUNX3, FCGR3A, HLA-E, HSPD1, INPP5D, LCK, NFATC2, SMARCC2, ZAP70, TBX21, CYRIB, RASAL3, IL4I1
Cluster 2	1h post exercise	BP	GO:0050865	regulation of cell activation	21	0.651131	2.41339	7.7112e-06	0.000478951	0.000388717	145	tags=86%, list=31%, signal=62%	CTSG, BST1, CR1, SIRPA, PLSCR1, FN1, TNFSF13, TGFB1, CD226, GP1BB, IL6ST, MDK, PLPP6, SOD1, PDGFA, F11R, HRG, CD47	BRAF, BST1, CD47, CR1, CTSG, FN1, GP1BB, HRG, IL6ST, MDK, PNP, PDGFA, PLSCR1, SOD1, TGFB1, YES1, TNFSF13, CD226, F11R, SIRPA, PLPP6
Cluster 3	1h post exercise	BP	GO:0050865	regulation of cell activation	24	-0.545101	-1.9771	0.00130891	0.0255211	0.0228003	84	tags=58%, list=25%, signal=47%	IL4I1, HSPD1, RAC2, RASAL3, CST7, TBC1D10C, HLA-E, LCK, RUNX1, TBX21, ZAP70, FCGR3A, RUNX3, STAP1	ATM, RUNX1, RUNX3, CTSC, FCGR3A, HLA-E, HSPD1, INPP5D, LCK, NFATC2, PKN1, RAC2, SMARCC2, ZAP70, CST7, SHPK, STAP1, LAT, TBX21, CYRIB, RASAL3, RASSF5, IL4I1, TBC1D10C
Cluster 2	1h post exercise	BP	GO:0002697	regulation of immune effector process	13	0.694475	2.33855	7.72726e-05	0.00239974	0.00194763	87	tags=77%, list=19%, signal=64%	S100A9, CR1, FCN1, ITGAM, FCGR1A, HPX, TNFSF13, TGFB1, CD226, CD36	C3, CD36, CR1, FCGR1A, FCN1, GPI, HPX, ITGAM, S100A9, TGFB1, TNFSF13, CD226, CARD9
Cluster 3	1h post exercise	BP	GO:0002697	regulation of immune effector process	15	-0.676376	-2.19037	5.96148e-05	0.0036426	0.00325426	84	tags=73%, list=25%, signal=57%	IL4I1, HSPD1, SH2D1A, RAC2, HLA-E, CX3CR1, PHB1, HLA-F, TBX21, SH2D1B, STAP1	CX3CR1, HLA-E, HLA-F, HSPD1, SH2D1A, PHB1, PKN1, RAC2, TAP2, STAP1, TBX21, CYRIB, DDX60, SH2D1B, IL4I1
Cluster 2	1h post exercise	BP	GO:0002682	regulation of immune system process	64	0.423669	1.82521	0.00115052	0.0186417	0.0151296	96	tags=41%, list=21%, signal=37%	CTSG, ELANE, BST1, S100A9, CR1, SIRPA, S100A8, FCN1, PLSCR1, CFD, ORM2, ITGAM, CD14, ECM1, THBS4, FN1, FCGR1A, HPX, TNFSF13, CFHR1, TGFB1, CD226, CD36, IL6ST, SERPINE1, MDK	BRAF, BST1, C3, C4A, C5, C8G, CALR, CASP6, CD14, CD36, CD47, CR1, CTSG, CFD, ECM1, ELANE, FCGR1A, FCN1, FN1, GPI, CFHR1, HPX, HRG, IGKC, IL6ST, INPPL1, ITGA2, ITGA2B, ITGAM, MDK, PNP, ORM2, SERPINE1, PLSCR1, PPP2CA, PRKCB, MAPK1, PSMA1, S100A8, S100A9, SOD1, ADAM17, TGFB1, THBS4, YES1, YWHAE, TNFSF13, USP15, CD226, MKRN2, SIAE, GPR108, PITHD1, RTN4, SMAP1, CARD9, PDGFD, CLPB, FAM210B, SMCR8, SIRP…
Cluster 3	1h post exercise	BP	GO:0002682	regulation of immune system process	61	-0.423537	-1.79543	0.000751482	0.0173006	0.0154561	84	tags=43%, list=25%, signal=39%	IL4I1, HSPD1, GBP5, SH2D1A, HCLS1, RAC2, RASAL3, PAK2, CST7, NLRC3, TBC1D10C, HLA-E, CX3CR1, PHB1, LCK, HLA-F, RUNX1, TRGC1, TBX21, CD247, PYHIN1, ZAP70, FCGR3A, SH2D1B, RUNX3, STAP1	ATM, CASP8, RUNX1, RUNX3, CD247, CTSC, CX3CR1, DDX3X, FCGR3A, GBP1, GBP2, HCLS1, HLA-E, HLA-F, HSPD1, INPP5D, LCK, SH2D1A, NFATC2, PAK2, PCBP2, PHB1, PRKCH, PKN1, PURB, RAC2, RPS6KA3, SMARCC2, STAT1, TAP2, TRGC1, ZAP70, CST7, RAB29, CHST2, MATR3, RBM14, TTLL12, RFTN1, SHPK, PRKD2, SAMHD1, STAP1, LAT, STK39, TBK1, TBX21, CYRIB, DDX60, LYAR, ERBIN, MYO1G, RASAL3, TRAF3IP3, RASSF5, GBP5, SH2D1B, PYH…
Cluster 2	1h post exercise	BP	GO:0002694	regulation of leukocyte activation	17	0.649288	2.31569	9.19372e-05	0.00266787	0.00216524	118	tags=76%, list=25%, signal=59%	CTSG, BST1, CR1, SIRPA, PLSCR1, FN1, TNFSF13, TGFB1, CD226, IL6ST, MDK, PLPP6, SOD1	BRAF, BST1, CD47, CR1, CTSG, FN1, IL6ST, MDK, PNP, PLSCR1, SOD1, TGFB1, YES1, TNFSF13, CD226, SIRPA, PLPP6
Cluster 3	1h post exercise	BP	GO:0002694	regulation of leukocyte activation	24	-0.545101	-1.9771	0.00130891	0.0255211	0.0228003	84	tags=58%, list=25%, signal=47%	IL4I1, HSPD1, RAC2, RASAL3, CST7, TBC1D10C, HLA-E, LCK, RUNX1, TBX21, ZAP70, FCGR3A, RUNX3, STAP1	ATM, RUNX1, RUNX3, CTSC, FCGR3A, HLA-E, HSPD1, INPP5D, LCK, NFATC2, PKN1, RAC2, SMARCC2, ZAP70, CST7, SHPK, STAP1, LAT, TBX21, CYRIB, RASAL3, RASSF5, IL4I1, TBC1D10C
Cluster 2	1h post exercise	BP	GO:0051249	regulation of lymphocyte activation	13	0.608468	2.04893	0.00294136	0.0335555	0.0272336	118	tags=69%, list=25%, signal=53%	CTSG, BST1, CR1, SIRPA, TNFSF13, TGFB1, IL6ST, MDK, SOD1	BRAF, BST1, CD47, CR1, CTSG, IL6ST, MDK, PNP, SOD1, TGFB1, YES1, TNFSF13, SIRPA
Cluster 3	1h post exercise	BP	GO:0051249	regulation of lymphocyte activation	20	-0.540016	-1.88558	0.00289513	0.0460858	0.0411724	84	tags=60%, list=25%, signal=48%	IL4I1, HSPD1, RAC2, RASAL3, TBC1D10C, HLA-E, LCK, RUNX1, TBX21, ZAP70, FCGR3A, RUNX3	ATM, RUNX1, RUNX3, FCGR3A, HLA-E, HSPD1, INPP5D, LCK, NFATC2, PKN1, RAC2, SMARCC2, ZAP70, LAT, TBX21, CYRIB, RASAL3, RASSF5, IL4I1, TBC1D10C

## Sheet: GSEA cluster-specific
Cluster	Timepoint	ONTOLOGY	ID	Description	setSize	enrichmentScore	NES	pvalue	p.adjust	qvalue	rank	leading_edge	core_enrichment	annotated_proteins
Cluster 1	1h post exercise	CC	GO:0042582	azurophil granule	11	0.748017	2.15217	0.000155308	0.00353702	0.00296378	28	tags=55%, list=10%, signal=51%	DEFA3, BST2, AZU1, BPI, RETN, RNASE3	AZU1, BPI, BST2, DEFA3, LAMP1, LAMP2, RNASE3, VCP, CPNE3, RETN, TXNDC5
Cluster 1	1h post exercise	MF	GO:0097367	carbohydrate derivative binding	37	0.5104	1.70834	0.00209041	0.0268333	0.0224844	45	tags=35%, list=16%, signal=34%	LTF, CAMP, AZU1, BPI, PRKX, MYH9, RNASE3, MYH11, RAB3A, DGKH, ZNF146, MYO1D, RAF1	AZU1, BPI, CAMP, CDC42, GNAI2, DNAJA1, LTF, MVD, MYH9, MYH11, MYO1D, P2RY1, PRKX, RAB3A, RAF1, UPF1, RNASE3, VCP, VIL1, ZNF146, MANF, PIP4K2B, FPGT, FAM20B, SLC27A2, SEPHS2, STK38L, SEPTIN6, ATP13A2, CSNK1G1, DNAJA4, TAOK1, PPCDC, YTHDC2, UBE2Z, FN3KRP, DGKH
Cluster 1	1h post exercise	BP	GO:0071396	cellular response to lipid	14	0.766715	2.27491	8.12801e-06	0.000286919	0.000240418	27	tags=57%, list=10%, signal=54%	DEFA3, MMP9, LTF, CAMP, BPI, MMP8, CD55, CXCL2	BPI, CAMP, CD40, CD55, DEFA3, CXCL2, DNAJA1, LTF, MMP8, MMP9, UPF1, SLC7A5, PGRMC2, PTGES3
Cluster 1	1h post exercise	BP	GO:0071222	cellular response to lipopolysaccharide	11	0.847163	2.43743	4.04559e-07	3.15585e-05	2.64438e-05	27	tags=73%, list=10%, signal=68%	DEFA3, MMP9, LTF, CAMP, BPI, MMP8, CD55, CXCL2	BPI, CAMP, CD40, CD55, DEFA3, CXCL2, LTF, MMP8, MMP9, UPF1, SLC7A5
Cluster 1	1h post exercise	BP	GO:0071219	cellular response to molecule of bacterial origin	12	0.855863	2.48215	1.19086e-07	1.20107e-05	1.00641e-05	27	tags=75%, list=10%, signal=71%	DEFA3, MMP9, LTF, CAMP, BPI, MMP8, CD55, TLR1, CXCL2	BPI, CAMP, CD40, CD55, DEFA3, CXCL2, LTF, MMP8, MMP9, UPF1, TLR1, SLC7A5
Cluster 1	1h post exercise	BP	GO:0071310	cellular response to organic substance	35	0.535678	1.78286	0.00161071	0.0218686	0.0183243	55	tags=34%, list=20%, signal=31%	DEFA3, MMP9, LTF, CAMP, BPI, MMP8, CD55, CXCL2, PDGFB, RAF1, PTGES3, CD40	BPI, CAMP, CD40, CDC42, CD55, DEFA3, GNAI2, GRB2, CXCL2, DNAJA1, IGFBP7, ITGB3, LTF, MMP8, MMP9, OSBP, P2RY1, PDGFB, PPP3CB, RAF1, RDX, UPF1, UFD1, VCP, SLC7A5, PIP4K2B, PRMT5, PGRMC2, NFAT5, PTGES3, APPL1, TBL2, ERLEC1, EPG5, ERMP1
Cluster 1	1h post exercise	BP	GO:1901701	cellular response to oxygen-containing compound	25	0.620674	2.00176	0.000119033	0.00289783	0.00242818	62	tags=48%, list=22%, signal=41%	DEFA3, MMP9, LTF, CAMP, BPI, MMP8, CD55, CXCL2, PDGFB, RAF1, CD40, FXN	BPI, CAMP, CD40, CD55, DEFA3, FXN, GNAI2, GRB2, CXCL2, ITGB3, LTF, MMP8, MMP9, OSBP, P2RY1, PDGFB, PPP3CB, RAF1, UPF1, VCP, SLC7A5, PIP4K2B, PRMT5, PRDX3, APPL1
Cluster 1	1h post exercise	MF	GO:0004175	endopeptidase activity	12	0.734891	2.13131	0.000234684	0.00473391	0.00396669	16	tags=42%, list=6%, signal=41%	MMP9, LTF, AZU1, MMP8, TASP1	ADAM10, AZU1, BLMH, CASP2, CFI, LTF, MMP8, MMP9, NRDC, PSMA6, TASP1, ATG4C
Cluster 1	1h post exercise	MF	GO:0008289	lipid binding	28	0.544469	1.78226	0.00283036	0.0338684	0.0283794	89	tags=64%, list=32%, signal=49%	LTF, CAMP, BPI, CD55, TLR1, FCHO2, RNASE3, ANXA3, CD300A, FERMT2, PLD1, VIL1, ALB, CPNE8, GC, CPNE2, MANF, ATP13A2	ALB, ANXA3, APOD, BPI, CAMP, CD55, GC, LTF, OSBP, PLD1, RBP4, RNASE3, TLR1, VCP, VIL1, MANF, CPNE3, PGRMC2, FERMT2, WDR45, CD300A, ATP13A2, APPL1, AIDA, FCHO2, CPNE8, TOM1L2, CPNE2
Cluster 1	1h post exercise	BP	GO:0031325	positive regulation of cellular metabolic process	62	0.448279	1.58537	0.00457327	0.0489201	0.0409917	60	tags=35%, list=22%, signal=36%	MMP9, LTF, CAMP, AZU1, MMP8, TASP1, CD55, TLR1, MYH9, ORM1, PDGFB, ANXA3, S100A12, RAF1, PLGRKT, PTGES3, CD300A, FERMT2, CD40, PLD1, ELOVL5, DKK1	ANXA3, AZU1, B2M, CAMP, CD40, CDC42, CD55, DDT, GNAI2, GRB2, ITGB3, LTF, CD46, MMP8, MMP9, MYH9, NRDC, ORM1, OSBP, P2RY1, PAFAH1B2, PDGFB, PLD1, PPP3CB, RAF1, RBP4, RDX, UPF1, S100A12, TF, TLR1, UBE2V1, VCP, SLC7A5, PIP4K2B, SEMA7A, BAG2, DEPDC5, PRMT5, SEMA4D, PAIP1, NFAT5, PTGES3, FERMT2, WDR45, CHP1, CD300A, DKK1, ATP13A2, FAM98A, APPL1, DNAJA4, TASP1, PLGRKT, ALS2, ELOVL5, VSIR, PPP1R3E, WDFY…
Cluster 1	1h post exercise	BP	GO:0048522	positive regulation of cellular process	110	0.424535	1.5687	0.00201642	0.0263628	0.0220902	70	tags=35%, list=25%, signal=44%	MMP9, LTF, CAMP, BST2, AZU1, MMP8, RETN, CFP, TASP1, CEP135, CLTCL1, CD55, TLR1, MYH9, SIRPB1, TELO2, RAB3A, ORM1, PDGFB, ANXA3, S100A12, CD101, CD99, RAF1, PTP4A1, PLGRKT, CEP250, PTGES3, CD300A, FERMT2, CD40, PLD1, ELOVL5, DKK1, SLC7A1, FXN, TF, VIL1, SERINC3	ADAM10, ANXA3, AZU1, B2M, BST2, CAMP, CASP2, CD40, CDC42, CFL2, CD55, DDT, FXN, GNAI2, GRB2, HINT1, DNAJA1, ITGB1, ITGB3, LAMP1, LTF, CD46, CD99, MMP8, MMP9, MVD, MYH9, NRDC, ORM1, OSBP, P2RY1, PAFAH1B2, PDGFB, CFP, PLD1, PPP1CC, PPP3CB, RAB3A, RAD23A, RAF1, RBP4, RDX, UPF1, S100A12, SLC6A6, SLC7A1, TF, TLR1, UBE2V1, VCP, VIL1, PTP4A1, SLC7A5, CLTCL1, PIP4K2B, RECK, SEMA7A, CPNE3, CD101, GSTO1, B…
Cluster 1	1h post exercise	BP	GO:0009893	positive regulation of metabolic process	68	0.441367	1.58018	0.00472199	0.0497571	0.041693	60	tags=34%, list=22%, signal=35%	MMP9, LTF, LCN2, CAMP, AZU1, MMP8, TASP1, CD55, TLR1, MYH9, ORM1, PDGFB, ANXA3, S100A12, RAF1, PLGRKT, PTGES3, CD300A, FERMT2, CD40, PLD1, ELOVL5, DKK1	ANXA3, AZU1, B2M, CAMP, CASP2, CD40, CDC42, CD55, DDT, GNAI2, GRB2, ITGB3, LCN2, LTF, CD46, MMP8, MMP9, MYH9, NRDC, ORM1, OSBP, P2RY1, PAFAH1B2, PDGFB, PLD1, PPP3CB, RAD23A, RAF1, RBP4, RDX, UPF1, S100A12, ELOB, TF, TLR1, UBE2V1, VCP, SLC7A5, PIP4K2B, SEMA7A, BAG2, DEPDC5, PRMT5, SEMA4D, PAIP1, NFAT5, PTGES3, FERMT2, WDR45, CHP1, CD300A, DKK1, ATP13A2, FAM98A, APPL1, UBQLN1, DNAJA4, TASP1, PLGRKT…
Cluster 1	1h post exercise	BP	GO:0045937	positive regulation of phosphate metabolic process	21	0.608653	1.92132	0.000838035	0.012862	0.0107775	83	tags=67%, list=30%, signal=51%	MMP9, LTF, CAMP, AZU1, PDGFB, S100A12, RAF1, PTGES3, CD300A, FERMT2, CD40, TF, SEMA7A, P2RY1	AZU1, CAMP, CD40, ITGB3, LTF, MMP9, OSBP, P2RY1, PDGFB, RAF1, S100A12, TF, VCP, SEMA7A, SEMA4D, PTGES3, FERMT2, CHP1, CD300A, ALS2, WDFY2
Cluster 1	1h post exercise	BP	GO:0010562	positive regulation of phosphorus metabolic process	21	0.608653	1.92132	0.000838035	0.012862	0.0107775	83	tags=67%, list=30%, signal=51%	MMP9, LTF, CAMP, AZU1, PDGFB, S100A12, RAF1, PTGES3, CD300A, FERMT2, CD40, TF, SEMA7A, P2RY1	AZU1, CAMP, CD40, ITGB3, LTF, MMP9, OSBP, P2RY1, PDGFB, RAF1, S100A12, TF, VCP, SEMA7A, SEMA4D, PTGES3, FERMT2, CHP1, CD300A, ALS2, WDFY2
Cluster 1	1h post exercise	BP	GO:0042327	positive regulation of phosphorylation	19	0.645719	2.01521	0.000321264	0.00630035	0.00527925	83	tags=74%, list=30%, signal=56%	MMP9, LTF, CAMP, AZU1, PDGFB, S100A12, RAF1, PTGES3, CD300A, FERMT2, CD40, TF, SEMA7A, P2RY1	AZU1, CAMP, CD40, ITGB3, LTF, MMP9, OSBP, P2RY1, PDGFB, RAF1, S100A12, TF, SEMA7A, SEMA4D, PTGES3, FERMT2, CD300A, ALS2, WDFY2
Cluster 1	1h post exercise	BP	GO:0051247	positive regulation of protein metabolic process	34	0.492862	1.64077	0.00449891	0.0488651	0.0409455	56	tags=38%, list=20%, signal=35%	MMP9, LTF, CAMP, AZU1, MYH9, PDGFB, S100A12, RAF1, PLGRKT, CD300A, FERMT2, CD40, PLD1	AZU1, CAMP, CASP2, CD40, ITGB3, LTF, MMP9, MYH9, NRDC, OSBP, P2RY1, PDGFB, PLD1, RAD23A, RAF1, RDX, S100A12, ELOB, UBE2V1, VCP, SEMA7A, BAG2, SEMA4D, PAIP1, FERMT2, CHP1, CD300A, UBQLN1, PLGRKT, TAOK1, ALS2, VSIR, WDFY2, MTPN
Cluster 1	1h post exercise	BP	GO:0031401	positive regulation of protein modification process	22	0.564559	1.79293	0.00349632	0.0404656	0.0339074	55	tags=45%, list=20%, signal=40%	MMP9, LTF, CAMP, AZU1, PDGFB, S100A12, RAF1, CD300A, FERMT2, CD40	AZU1, CAMP, CD40, ITGB3, LTF, MMP9, OSBP, P2RY1, PDGFB, RAF1, S100A12, UBE2V1, VCP, SEMA7A, SEMA4D, FERMT2, CHP1, CD300A, UBQLN1, TAOK1, ALS2, WDFY2
Cluster 1	1h post exercise	BP	GO:0001934	positive regulation of protein phosphorylation	17	0.648572	1.98712	0.00102166	0.0150269	0.0125915	55	tags=59%, list=20%, signal=50%	MMP9, LTF, CAMP, AZU1, PDGFB, S100A12, RAF1, CD300A, FERMT2, CD40	AZU1, CAMP, CD40, ITGB3, LTF, MMP9, OSBP, P2RY1, PDGFB, RAF1, S100A12, SEMA7A, SEMA4D, FERMT2, CD300A, ALS2, WDFY2
Cluster 1	1h post exercise	BP	GO:0051347	positive regulation of transferase activity	10	0.753735	2.13731	0.000554114	0.0093144	0.00780482	55	tags=80%, list=20%, signal=67%	LTF, AZU1, PDGFB, S100A12, PTGES3, CD300A, FERMT2, CD40	AZU1, CD40, ITGB3, LTF, PDGFB, S100A12, PTGES3, FERMT2, CD300A, ALS2
Cluster 1	1h post exercise	CC	GO:0005766	primary lysosome	11	0.748017	2.15217	0.000155308	0.00353702	0.00296378	28	tags=55%, list=10%, signal=51%	DEFA3, BST2, AZU1, BPI, RETN, RNASE3	AZU1, BPI, BST2, DEFA3, LAMP1, LAMP2, RNASE3, VCP, CPNE3, RETN, TXNDC5
Cluster 1	1h post exercise	BP	GO:0019220	regulation of phosphate metabolic process	27	0.529235	1.7272	0.00449891	0.0488651	0.0409455	83	tags=56%, list=30%, signal=43%	MMP9, LTF, CAMP, AZU1, PDGFB, S100A12, RAF1, PTGES3, CD300A, FERMT2, CD40, DKK1, TF, SEMA7A, P2RY1	AZU1, CAMP, CD40, DNAJA1, IGBP1, ITGB3, LTF, MMP9, OSBP, P2RY1, PDGFB, RAF1, S100A12, TF, VCP, SEMA7A, SEMA4D, PTGES3, PRDX3, FERMT2, CHP1, CD300A, DKK1, ALS2, AIDA, VPS25, WDFY2
Cluster 1	1h post exercise	BP	GO:0051174	regulation of phosphorus metabolic process	27	0.529235	1.7272	0.00449891	0.0488651	0.0409455	83	tags=56%, list=30%, signal=43%	MMP9, LTF, CAMP, AZU1, PDGFB, S100A12, RAF1, PTGES3, CD300A, FERMT2, CD40, DKK1, TF, SEMA7A, P2RY1	AZU1, CAMP, CD40, DNAJA1, IGBP1, ITGB3, LTF, MMP9, OSBP, P2RY1, PDGFB, RAF1, S100A12, TF, VCP, SEMA7A, SEMA4D, PTGES3, PRDX3, FERMT2, CHP1, CD300A, DKK1, ALS2, AIDA, VPS25, WDFY2
Cluster 1	1h post exercise	BP	GO:0042325	regulation of phosphorylation	25	0.557122	1.79679	0.00275637	0.0335516	0.0281139	83	tags=60%, list=30%, signal=46%	MMP9, LTF, CAMP, AZU1, PDGFB, S100A12, RAF1, PTGES3, CD300A, FERMT2, CD40, DKK1, TF, SEMA7A, P2RY1	AZU1, CAMP, CD40, DNAJA1, ITGB3, LTF, MMP9, OSBP, P2RY1, PDGFB, RAF1, S100A12, TF, SEMA7A, SEMA4D, PTGES3, PRDX3, FERMT2, CHP1, CD300A, DKK1, ALS2, AIDA, VPS25, WDFY2
Cluster 1	1h post exercise	BP	GO:0001932	regulation of protein phosphorylation	22	0.560258	1.77927	0.00442455	0.0488651	0.0409455	60	tags=50%, list=22%, signal=43%	MMP9, LTF, CAMP, AZU1, PDGFB, S100A12, RAF1, CD300A, FERMT2, CD40, DKK1	AZU1, CAMP, CD40, DNAJA1, ITGB3, LTF, MMP9, OSBP, P2RY1, PDGFB, RAF1, S100A12, SEMA7A, SEMA4D, FERMT2, CHP1, CD300A, DKK1, ALS2, AIDA, VPS25, WDFY2
Cluster 1	1h post exercise	BP	GO:0032101	regulation of response to external stimulus	21	0.578887	1.82736	0.00327434	0.038528	0.0322838	51	tags=48%, list=18%, signal=42%	MMP9, LTF, AZU1, MMP8, CD55, TLR1, PDGFB, S100A12, NT5E, CD300A	ADAM10, APCS, AZU1, CD55, DDT, LAMP1, LTF, MMP8, MMP9, NT5E, PDGFB, PSMA6, S100A12, TLR1, UFD1, SEMA7A, SEMA4D, CD300A, APPL1, UBQLN1, EPG5
Cluster 1	1h post exercise	BP	GO:0033993	response to lipid	20	0.694741	2.18528	2.24797e-05	0.000755747	0.000633263	60	tags=65%, list=22%, signal=55%	DEFA3, MMP9, LTF, CAMP, BPI, MMP8, CD55, CXCL2, ANXA3, PTGES3, PTGIR, CD40, DKK1	ANXA3, BPI, CAMP, CD40, CD55, DEFA3, CXCL2, DNAJA1, IGFBP7, LTF, MMP8, MMP9, PTGIR, RBP4, UPF1, SLC7A5, PGRMC2, PTGES3, PRDX3, DKK1
Cluster 1	1h post exercise	BP	GO:0010033	response to organic substance	54	0.492937	1.728	0.00072813	0.0119549	0.0100174	60	tags=35%, list=22%, signal=34%	DEFA3, MMP9, LTF, CAMP, BST2, BPI, MMP8, RETN, CD55, TLR1, CXCL2, PDGFB, ANXA3, NT5E, RAF1, PTGES3, PTGIR, CD40, DKK1	ADAM10, ANXA3, B2M, BPI, BST2, CAMP, CD40, CDC42, CD55, DEFA3, GNAI2, GRB2, CXCL2, DNAJA1, IGBP1, IGFBP7, ITGB1, ITGB3, LTF, MMP8, MMP9, NT5E, OSBP, P2RY1, PDGFB, PPP3CB, PSMB2, PTGIR, RAF1, RBP4, RDX, UPF1, TLR1, UFD1, VCP, MANF, SLC7A5, PIP4K2B, PRMT5, PGRMC2, NFAT5, PTGES3, PRDX3, DKK1, ERP44, SDF2L1, APPL1, TBL2, ERLEC1, UBQLN1, RETN, EPG5, YTHDC2, ERMP1
Cluster 1	1h post exercise	BP	GO:1901700	response to oxygen-containing compound	32	0.60833	2.00914	3.56402e-05	0.00100648	0.000843359	62	tags=50%, list=22%, signal=44%	DEFA3, MMP9, LTF, CAMP, BPI, MMP8, RETN, CD55, CXCL2, PDGFB, NT5E, RAF1, PTGIR, CD40, DKK1, FXN	APOD, BPI, CAMP, CD40, CD55, DEFA3, FXN, GNAI2, GRB2, CXCL2, IGFBP7, ITGB3, LTF, MMP8, MMP9, NT5E, OSBP, P2RY1, PDGFB, PPP3CB, PTGIR, RAF1, RBP4, UPF1, VCP, SLC7A5, PIP4K2B, PRMT5, PRDX3, DKK1, APPL1, RETN
Cluster 1	1h post exercise	CC	GO:0035580	specific granule lumen	10	0.840422	2.38312	4.38967e-06	0.000163111	0.000136676	15	tags=70%, list=5%, signal=69%	LTF, LCN2, CAMP, BPI, MMP8, RETN, CFP	B2M, BPI, CAMP, LCN2, LTF, MMP8, ORM1, CFP, ERP44, RETN
Cluster 2	1h post exercise	CC	GO:0035578	azurophil granule lumen	21	0.55379	2.0526	0.00124256	0.0192941	0.0156591	70	tags=43%, list=15%, signal=38%	CTSG, PRTN3, ELANE, MPO, LYZ, GCA, ORM2, RNASE2, GM2A	ACLY, ARSB, C3, CTSG, CYB5R3, ELANE, FUCA2, GDI2, GM2A, GNS, LYZ, MAN2B1, MPO, ORM2, MAPK1, PRTN3, RNASE2, GGH, VAT1, GCA, TOLLIP
Cluster 2	1h post exercise	BP	GO:0048514	blood vessel morphogenesis	27	0.50124	1.94746	0.00342233	0.0375114	0.0304442	145	tags=67%, list=31%, signal=49%	ANPEP, SEMA4A, LRP1, ECM1, THBS4, FN1, HSPG2, SPARC, ENG, TGFB1, TGFBI, SERPINE1, MDK, ITGAV, ITGA5, PDGFA, HRG, CD47	ANPEP, BSG, C3, CD47, ECM1, ENG, FN1, B4GALT1, HRG, HSPG2, ITGA2B, ITGA5, ITGAV, LRP1, MDK, SERPINE1, PDGFA, PRKCB, ROCK1, SPARC, TGFB1, TGFBI, THBS4, SLC12A6, STAB1, MYDGF, SEMA4A
Cluster 2	1h post exercise	MF	GO:0005509	calcium ion binding	29	0.61039	2.39319	3.45662e-06	0.000248765	0.000201898	122	tags=69%, list=26%, signal=54%	VCAN, CD93, S100A9, PADI4, S100A8, FKBP7, LRP1, GCA, PLSCR1, DYSF, THBS4, HSPG2, SPARC, PLSCR3, TPT1, F12, ITGA5, AGRN, GPD2, TPM4	BRAF, CALR, VCAN, F12, GPD2, HSPG2, ITGA5, LRP1, PLSCR1, PROS1, S100A8, S100A9, SPARC, THBS4, TKT, TPM4, TPT1, DYSF, CD93, TBC1D9B, STAB1, ESYT1, PADI4, GCA, FKBP7, PLSCR3, MCTP1, MICU2, AGRN
Cluster 2	1h post exercise	BP	GO:0002263	cell activation involved in immune response	10	0.683886	2.17143	0.00087467	0.0154394	0.0125306	96	tags=80%, list=21%, signal=65%	CR1, SEMA4A, LRP1, DYSF, ITGAM, TNFSF13, TGFB1, MDK	CR1, ITGAM, LRP1, MDK, SLC18A2, TGFB1, TSC1, DYSF, TNFSF13, SEMA4A
Cluster 2	1h post exercise	BP	GO:0007155	cell adhesion	59	0.525791	2.24299	6.08773e-07	9.72297e-05	7.89116e-05	111	tags=54%, list=24%, signal=47%	CTSG, ELANE, BST1, VCAN, CD93, S100A9, CR1, ADD2, AZGP1, SIRPA, S100A8, DLG4, SIGLEC9, ITGAM, THBS4, FN1, HSPG2, TPM1, ESAM, ENG, TGFB1, CD226, TGFBI, CD36, GP1BB, IL6ST, SERPINE1, MDK, LAMA4, ITGAV, ITGA5, VWF	ADD2, AZGP1, BRAF, BST1, CALR, CD36, CD47, CR1, VCAN, CTSG, DLG4, ELANE, ENG, FN1, B4GALT1, GP1BB, HRG, HSPG2, IGFALS, IL6ST, INPPL1, ITGA2, ITGA2B, ITGA5, ITGAM, ITGAV, LAMA4, LAMB1, MDK, PNP, SERPINE1, PECAM1, PPIA, PPP2CA, ROCK1, S100A8, S100A9, ST6GAL1, ADAM17, TGFB1, TGFBI, THBS4, TPM1, TSC1, VWF, YES1, SLK, TM9SF4, PIEZO1, CD226, RAB10, CD93, STAB1, CORO1C, PLXNB2, SIGLEC9, F11R, ESAM, SIRPA
Cluster 2	1h post exercise	BP	GO:0016477	cell migration	67	0.413798	1.79096	0.00126096	0.0193118	0.0156734	114	tags=43%, list=24%, signal=38%	CTSG, PRTN3, ELANE, BST1, S100A9, KRT2, ADD2, SIRPA, S100A8, SEMA4A, LRP1, CEMIP, ECM1, CXCL3, TIMP1, THBS4, FN1, TPM1, SPARC, ENG, TGFB1, SERPINE1, MDK, PDGFC, LAMA4, ITGAV, ITGA5, ARSB, GLIPR2	ADD2, ARSB, BRAF, BSG, BST1, C5, CALR, CD47, CTSG, ECM1, ELANE, ENG, FN1, B4GALT1, GPI, CXCL3, HRG, ITGA2, ITGA2B, ITGA5, ITGAV, KRT2, LAMA4, LAMB1, LRP1, MDK, MGAT5, PAFAH1B1, SERPINE1, PDGFA, PECAM1, PFN1, PPIA, MAPK1, PRTN3, ROCK1, S100A8, S100A9, FSCN1, SPARC, ADAM17, TGFB1, THBS4, TIMP1, TPM1, YES1, YWHAE, SLK, SEMA4B, CAPN7, CORO1C, PLXNB2, IL17RA, F11R, ELP6, CCDC88A, PDGFC, RTN4, CEMIP, M…
Cluster 2	1h post exercise	BP	GO:0048870	cell motility	69	0.402092	1.74508	0.0023124	0.0293779	0.0238431	150	tags=51%, list=32%, signal=40%	CTSG, PRTN3, ELANE, BST1, S100A9, KRT2, ADD2, SIRPA, S100A8, SEMA4A, LRP1, CEMIP, ECM1, CXCL3, TIMP1, THBS4, FN1, TPM1, SPARC, ENG, TGFB1, SERPINE1, MDK, PDGFC, LAMA4, ITGAV, ITGA5, ARSB, GLIPR2, PDGFA, F11R, HRG, VDAC3, CD47, PDGFD	ADD2, ARSB, BRAF, BSG, BST1, C5, CALR, CD47, CTSG, ECM1, ELANE, ENG, FN1, B4GALT1, GPI, CXCL3, HRG, ITGA2, ITGA2B, ITGA5, ITGAV, KRT2, LAMA4, LAMB1, LRP1, MDK, MGAT5, PAFAH1B1, SERPINE1, PDGFA, PECAM1, PFN1, PPIA, MAPK1, PRTN3, ROCK1, S100A8, S100A9, FSCN1, SPARC, ADAM17, TGFB1, THBS4, TIMP1, TPM1, VDAC3, YES1, YWHAE, SLK, SEMA4B, CAPN7, CORO1C, PLXNB2, IL17RA, F11R, ELP6, CCDC88A, PDGFC, RTN4, C…
Cluster 2	Post exercise	CC	GO:0071944	cell periphery	202	-0.468917	-1.51567	4.29365e-05	0.0120007	0.0112765	146	tags=42%, list=31%, signal=51%	ENG, YWHAE, C4A, MLEC, IGFALS, TOLLIP, CD93, ADAM17, RALA, LAMB1, ANO10, AGPAT3, MTM1, ELANE, SH3BGRL3, RAP1B, PIEZO1, C5, PROS1, NCSTN, TPM4, CPM, SLC44A1, CD109, DAGLB, SEMA4A, RAB10, TACC2, GCA, SORT1, IGKC, FHIT, CARD9, TIMP1, IL6ST, TGFB1, SLC18A2, TPM1, SIGMAR1, RALB, CTSG, C3, SLC22A18, MDK, PLSCR1, APLP2, LILRA3, NLN, SPARC, PLOD3, ITIH4, MCEMP1, HRG, SERPINE1, S100A9, SIGLEC9, MAGT1, CST…	A1BG, ACP3, ADD2, ALDH3B1, ANPEP, APLP2, ARF1, ARRB1, ATP6V0A1, AZGP1, BRAF, BSG, BST1, C3, C4A, C5, C8G, CALR, CD14, CD36, CD47, SEPTIN7, AP2M1, CP, CPM, CR1, CSF2RA, VCAN, CST3, CTSB, CTSG, CTSZ, DLG4, ECM1, ELANE, ENG, ENO1, ENO2, STOM, F12, ACSL4, FCGR1A, FCGRT, FCN1, FHIT, FN1, B4GALT1, GM2A, GNAI1, GNB2, GNG5, GOT2, GP1BB, GPI, GSR, HPX, HRG, HSPG2, IDE, IGFALS, IGKC, IGLC2, IL6ST, INPPL1, …
Cluster 2	1h post exercise	CC	GO:0071944	cell periphery	202	0.41571	1.96308	7.36486e-07	0.000102924	8.3533e-05	137	tags=43%, list=29%, signal=53%	CTSG, PRTN3, ELANE, BST1, LILRA3, VCAN, OSCAR, CD93, MCEMP1, VNN2, S100A9, KRT2, CR1, ADD2, CSF2RA, AZGP1, ANPEP, SIRPA, S100A8, DLG4, FCN1, CST3, SEMA4A, LRP1, CPM, GCA, PLSCR1, FCGRT, ORM2, DYSF, ATRN, CEMIP, SIGLEC9, ITGAM, MGST1, CD14, ECM1, TIMP1, THBS4, FN1, A1BG, HSPG2, TPM1, GM2A, SLC44A1, ESAM, FCGR1A, HPX, SPARC, ENG, PLSCR3, TGFB1, CD226, TGFBI, CD36, GP1BB, ACP3, IL6ST, SH3BGRL3, SERP…	A1BG, ACP3, ADD2, ALDH3B1, ANPEP, APLP2, ARF1, ARRB1, ATP6V0A1, AZGP1, BRAF, BSG, BST1, C3, C4A, C5, C8G, CALR, CD14, CD36, CD47, SEPTIN7, AP2M1, CP, CPM, CR1, CSF2RA, VCAN, CST3, CTSB, CTSG, CTSZ, DLG4, ECM1, ELANE, ENG, ENO1, ENO2, STOM, F12, ACSL4, FCGR1A, FCGRT, FCN1, FHIT, FN1, B4GALT1, GM2A, GNAI1, GNB2, GNG5, GOT2, GP1BB, GPI, GSR, HPX, HRG, HSPG2, IDE, IGFALS, IGKC, IGLC2, IL6ST, INPPL1, …
Cluster 2	1h post exercise	BP	GO:0007166	cell surface receptor signaling pathway	89	0.401772	1.79324	0.000883829	0.0154394	0.0125306	152	tags=51%, list=32%, signal=42%	CTSG, BST1, LILRA3, OSCAR, CDA, CR1, CSF2RA, DLG4, FCN1, SEMA4A, LRP1, PLSCR1, SIGLEC9, ITGAM, CD14, ECM1, CXCL3, TIMP1, FN1, HSPG2, FCGR1A, HPX, ENG, TGFB1, CD226, CD36, GP1BB, ACP3, IL6ST, SERPINE1, MDK, PDGFC, CLEC1B, ITGAV, ITGA5, TSPAN15, PDGFA, NCSTN, HTRA2, HRG, CHSY1, CD47, IGKC, PDGFD, SORT1	ACP3, ARL3, ARRB1, BRAF, BSG, BST1, C3, C5, CD14, CD36, CD47, CDA, CR1, CSF2RA, CTSG, DLG4, ECM1, ENG, ACSL1, FCGR1A, FCN1, FN1, GOT1, GP1BB, CXCL3, GSTP1, HPX, HRG, HSPG2, IDE, IGKC, IL6ST, INPPL1, ITGA2, ITGA2B, ITGA5, ITGAM, ITGAV, LAMB1, LRP1, MDK, MGAT5, SEPTIN2, PAFAH1B1, SERPINE1, PDGFA, PECAM1, PLSCR1, PPP2CA, PRKAA1, PRKCB, MAPK1, RALA, RALB, SORT1, ADAM17, TGFB1, TIMP1, YES1, RAB7A, SHO…
Cluster 2	1h post exercise	BP	GO:0045123	cellular extravasation	11	0.639186	2.08063	0.0023124	0.0293779	0.0238431	29	tags=45%, list=6%, signal=44%	PRTN3, ELANE, BST1, ADD2, SIRPA	ADD2, BST1, CD47, ELANE, MDK, PECAM1, PRTN3, ROCK1, F11R, PDGFD, SIRPA
Cluster 2	Post exercise	CC	GO:0062023	collagen-containing extracellular matrix	34	-0.628068	-1.82596	6.93763e-05	0.0144247	0.0135541	91	tags=56%, list=19%, signal=49%	TIMP1, TGFB1, CTSG, MDK, PLSCR1, SPARC, PLOD3, ITIH4, HRG, SERPINE1, S100A9, TGFBI, PRTN3, AZGP1, F12, CTSZ, CTSB, FCN1, VCAN	A1BG, AZGP1, CALR, VCAN, CTSB, CTSG, CTSZ, ECM1, ELANE, F12, FCN1, FN1, HPX, HRG, HSPG2, ITIH4, LAMA4, LAMB1, MDK, ORM2, SERPINE1, PLSCR1, PRTN3, S100A8, S100A9, SPARC, TGFB1, TGFBI, THBS4, TIMP1, VWF, PLOD3, P3H1, AGRN
Cluster 2	1h post exercise	CC	GO:0062023	collagen-containing extracellular matrix	34	0.678168	2.73577	1.42379e-09	8.63879e-07	7.01124e-07	115	tags=79%, list=25%, signal=65%	CTSG, PRTN3, ELANE, VCAN, S100A9, AZGP1, S100A8, FCN1, PLSCR1, ORM2, ECM1, TIMP1, THBS4, FN1, A1BG, HSPG2, HPX, SPARC, TGFB1, TGFBI, SERPINE1, MDK, LAMA4, F12, CTSZ, VWF, AGRN	A1BG, AZGP1, CALR, VCAN, CTSB, CTSG, CTSZ, ECM1, ELANE, F12, FCN1, FN1, HPX, HRG, HSPG2, ITIH4, LAMA4, LAMB1, MDK, ORM2, SERPINE1, PLSCR1, PRTN3, S100A8, S100A9, SPARC, TGFB1, TGFBI, THBS4, TIMP1, VWF, PLOD3, P3H1, AGRN
Cluster 2	1h post exercise	CC	GO:0030139	endocytic vesicle	23	0.517278	1.95722	0.00412711	0.0431225	0.0349982	105	tags=52%, list=22%, signal=43%	ELANE, MPO, DLG4, LRP1, DYSF, CEMIP, HP, FCGR1A, HPX, SPARC, CD36, ITGAV	ATP6V0A1, CALR, CD36, AP2M1, DLG4, ELANE, FCGR1A, HP, HPX, ITGAV, LRP1, MPO, RALA, SPARC, RAB7A, DYSF, RAB11B, RAB10, RAB31, STAB1, RAB8B, CEMIP, VPS26B
Cluster 2	Post exercise	CC	GO:0030312	external encapsulating structure	35	-0.611347	-1.78207	0.000103218	0.0144247	0.0135541	91	tags=54%, list=19%, signal=47%	TIMP1, TGFB1, CTSG, MDK, PLSCR1, SPARC, PLOD3, ITIH4, HRG, SERPINE1, S100A9, TGFBI, PRTN3, AZGP1, F12, CTSZ, CTSB, FCN1, VCAN	A1BG, AZGP1, CALR, VCAN, CTSB, CTSG, CTSZ, ECM1, ELANE, F12, FCN1, FN1, HPX, HRG, HSPG2, IGFALS, ITIH4, LAMA4, LAMB1, MDK, ORM2, SERPINE1, PLSCR1, PRTN3, S100A8, S100A9, SPARC, TGFB1, TGFBI, THBS4, TIMP1, VWF, PLOD3, P3H1, AGRN
Cluster 2	1h post exercise	CC	GO:0030312	external encapsulating structure	35	0.663139	2.68273	2.3181e-09	8.63879e-07	7.01124e-07	115	tags=77%, list=25%, signal=63%	CTSG, PRTN3, ELANE, VCAN, S100A9, AZGP1, S100A8, FCN1, PLSCR1, ORM2, ECM1, TIMP1, THBS4, FN1, A1BG, HSPG2, HPX, SPARC, TGFB1, TGFBI, SERPINE1, MDK, LAMA4, F12, CTSZ, VWF, AGRN	A1BG, AZGP1, CALR, VCAN, CTSB, CTSG, CTSZ, ECM1, ELANE, F12, FCN1, FN1, HPX, HRG, HSPG2, IGFALS, ITIH4, LAMA4, LAMB1, MDK, ORM2, SERPINE1, PLSCR1, PRTN3, S100A8, S100A9, SPARC, TGFB1, TGFBI, THBS4, TIMP1, VWF, PLOD3, P3H1, AGRN
Cluster 2	1h post exercise	BP	GO:0045229	external encapsulating structure organization	13	0.669429	2.25421	0.000303037	0.00639236	0.00518804	86	tags=69%, list=18%, signal=58%	CTSG, ELANE, CST3, LRP1, MPV17, QSOX1, ENG, TGFB1, TGFBI	CST3, CTSG, ELANE, ENG, B4GALT1, LAMB1, LRP1, MPV17, QSOX1, FSCN1, TGFB1, TGFBI, PLOD3
Cluster 2	Post exercise	CC	GO:0009897	external side of plasma membrane	22	-0.71434	-1.98625	1.36855e-05	0.00510013	0.00479233	40	tags=41%, list=9%, signal=39%	B4GALT1, CD14, AZGP1, ANPEP, CTSB, FCGRT, CSF2RA, FCN1, FCGR1A	ANPEP, AZGP1, CALR, CD14, CD36, CSF2RA, CTSB, ENG, FCGR1A, FCGRT, FCN1, B4GALT1, GSR, IDE, IL6ST, ITGA2, ITGA2B, ITGA5, ITGAM, ITGAV, PECAM1, CD226
Cluster 2	1h post exercise	CC	GO:0009897	external side of plasma membrane	22	0.55107	2.06638	0.000828876	0.0149465	0.0121306	108	tags=64%, list=23%, signal=51%	CSF2RA, AZGP1, ANPEP, FCN1, FCGRT, ITGAM, CD14, FCGR1A, ENG, CD226, CD36, IL6ST, ITGAV, ITGA5	ANPEP, AZGP1, CALR, CD14, CD36, CSF2RA, CTSB, ENG, FCGR1A, FCGRT, FCN1, B4GALT1, GSR, IDE, IL6ST, ITGA2, ITGA2B, ITGA5, ITGAM, ITGAV, PECAM1, CD226
Cluster 2	Post exercise	CC	GO:0031012	extracellular matrix	35	-0.611347	-1.78207	0.000103218	0.0144247	0.0135541	91	tags=54%, list=19%, signal=47%	TIMP1, TGFB1, CTSG, MDK, PLSCR1, SPARC, PLOD3, ITIH4, HRG, SERPINE1, S100A9, TGFBI, PRTN3, AZGP1, F12, CTSZ, CTSB, FCN1, VCAN	A1BG, AZGP1, CALR, VCAN, CTSB, CTSG, CTSZ, ECM1, ELANE, F12, FCN1, FN1, HPX, HRG, HSPG2, IGFALS, ITIH4, LAMA4, LAMB1, MDK, ORM2, SERPINE1, PLSCR1, PRTN3, S100A8, S100A9, SPARC, TGFB1, TGFBI, THBS4, TIMP1, VWF, PLOD3, P3H1, AGRN
Cluster 2	1h post exercise	CC	GO:0031012	extracellular matrix	35	0.663139	2.68273	2.3181e-09	8.63879e-07	7.01124e-07	115	tags=77%, list=25%, signal=63%	CTSG, PRTN3, ELANE, VCAN, S100A9, AZGP1, S100A8, FCN1, PLSCR1, ORM2, ECM1, TIMP1, THBS4, FN1, A1BG, HSPG2, HPX, SPARC, TGFB1, TGFBI, SERPINE1, MDK, LAMA4, F12, CTSZ, VWF, AGRN	A1BG, AZGP1, CALR, VCAN, CTSB, CTSG, CTSZ, ECM1, ELANE, F12, FCN1, FN1, HPX, HRG, HSPG2, IGFALS, ITIH4, LAMA4, LAMB1, MDK, ORM2, SERPINE1, PLSCR1, PRTN3, S100A8, S100A9, SPARC, TGFB1, TGFBI, THBS4, TIMP1, VWF, PLOD3, P3H1, AGRN
Cluster 2	1h post exercise	BP	GO:0030198	extracellular matrix organization	13	0.669429	2.25421	0.000303037	0.00639236	0.00518804	86	tags=69%, list=18%, signal=58%	CTSG, ELANE, CST3, LRP1, MPV17, QSOX1, ENG, TGFB1, TGFBI	CST3, CTSG, ELANE, ENG, B4GALT1, LAMB1, LRP1, MPV17, QSOX1, FSCN1, TGFB1, TGFBI, PLOD3
Cluster 2	1h post exercise	MF	GO:0005201	extracellular matrix structural constituent	10	0.707076	2.24506	0.000344049	0.00712308	0.00578109	115	tags=90%, list=25%, signal=69%	VCAN, ECM1, FN1, HSPG2, SPARC, TGFBI, LAMA4, VWF, AGRN	VCAN, ECM1, FN1, HSPG2, LAMA4, LAMB1, SPARC, TGFBI, VWF, AGRN
Cluster 2	1h post exercise	CC	GO:0005576	extracellular region	242	0.365159	1.72202	0.000104346	0.00290685	0.0023592	146	tags=40%, list=31%, signal=57%	CTSG, PRTN3, ELANE, BST1, MPO, LILRA3, VCAN, LYZ, OSCAR, CDA, VNN2, PLBD1, S100A9, KRT2, CR1, CSF2RA, AZGP1, ANPEP, SIRPA, S100A8, FCN1, CPXM1, CST3, CPM, GCA, PLSCR1, FCGRT, CFD, ORM2, DYSF, ATRN, CEMIP, ITGAM, CD14, ECM1, HP, CXCL3, TIMP1, RNASE2, THBS4, FN1, A1BG, HSPG2, GM2A, SLC44A1, HPX, SPARC, TNFSF13, QSOX1, CFHR1, ENG, ATAD2, TGFB1, TGFBI, CD36, TPT1, ACP3, IL6ST, SH3BGRL3, SERPINE1, MDK…	A1BG, ACLY, ACP2, ACP3, ADH5, AFM, AK2, ALAD, ALDH1A1, ALDH3B1, ALDOA, ANPEP, APEH, APLP2, ARF1, ARL3, ARSB, ATP6V0A1, AZGP1, BSG, BST1, BTD, C3, C4A, C5, C8G, CALR, CAT, CD14, CD36, CD47, CDA, SEPTIN7, AP2M1, CNP, CP, CPM, CR1, CSF2RA, VCAN, CST3, CTSB, CTSG, CTSZ, CFD, CYB5R3, ECM1, ELANE, ENG, ENO1, ENO2, STOM, ESD, F12, ACSL4, FAH, FCGRT, FCN1, FN1, FUCA2, GALNT2, GBE1, GDI2, B4GALT1, GM2A, G…
Cluster 2	1h post exercise	CC	GO:0005615	extracellular space	224	0.333157	1.57051	0.00246039	0.029899	0.0242661	230	tags=58%, list=49%, signal=57%	CTSG, PRTN3, ELANE, BST1, MPO, VCAN, LYZ, OSCAR, PLBD1, S100A9, KRT2, CR1, AZGP1, ANPEP, SIRPA, S100A8, FCN1, CPXM1, CST3, CPM, GCA, PLSCR1, FCGRT, CFD, ORM2, DYSF, ATRN, ITGAM, CD14, ECM1, HP, CXCL3, TIMP1, RNASE2, THBS4, FN1, A1BG, HSPG2, GM2A, SLC44A1, HPX, SPARC, TNFSF13, QSOX1, CFHR1, ENG, ATAD2, TGFB1, TGFBI, CD36, TPT1, ACP3, IL6ST, SH3BGRL3, SERPINE1, PDGFC, ALDH3B1, LAMA4, ITGAV, F12, CT…	A1BG, ACLY, ACP2, ACP3, ADH5, AFM, AK2, ALAD, ALDH1A1, ALDH3B1, ALDOA, ANPEP, APEH, APLP2, ARF1, ARL3, ARSB, ATP6V0A1, AZGP1, BSG, BST1, BTD, C3, C4A, C5, C8G, CALR, CAT, CD14, CD36, CD47, SEPTIN7, AP2M1, CNP, CP, CPM, CR1, VCAN, CST3, CTSB, CTSG, CTSZ, CFD, ECM1, ELANE, ENG, ENO1, ENO2, STOM, ESD, F12, ACSL4, FAH, FCGRT, FCN1, FN1, FUCA2, GBE1, GDI2, B4GALT1, GM2A, GNAI1, GNB2, GNG5, GNS, GOT1, …
Cluster 2	1h post exercise	BP	GO:0043062	extracellular structure organization	13	0.669429	2.25421	0.000303037	0.00639236	0.00518804	86	tags=69%, list=18%, signal=58%	CTSG, ELANE, CST3, LRP1, MPV17, QSOX1, ENG, TGFB1, TGFBI	CST3, CTSG, ELANE, ENG, B4GALT1, LAMB1, LRP1, MPV17, QSOX1, FSCN1, TGFB1, TGFBI, PLOD3
Cluster 2	1h post exercise	BP	GO:0010001	glial cell differentiation	12	0.639819	2.12137	0.00162912	0.0230242	0.0186865	129	tags=75%, list=28%, signal=56%	VCAN, S100A9, S100A8, LRP1, TGFB1, IL6ST, MDK, SOD1, NCSTN	CNP, VCAN, IL6ST, LRP1, MDK, MAPK1, S100A8, S100A9, SOD1, TGFB1, NCSTN, DICER1
Cluster 2	1h post exercise	MF	GO:0005539	glycosaminoglycan binding	16	0.59431	2.09549	0.00164753	0.0230242	0.0186865	140	tags=75%, list=30%, signal=54%	CTSG, ELANE, MPO, VCAN, CEMIP, THBS4, FN1, ENG, MDK, AGRN, APLP2, HRG	APLP2, VCAN, CTSG, ELANE, ENG, FN1, GNS, HRG, MDK, MPO, PAFAH1B1, PPIA, THBS4, STAB1, CEMIP, AGRN
Cluster 2	1h post exercise	CC	GO:0098857	membrane microdomain	17	0.569602	2.03148	0.0023124	0.0293779	0.0238431	92	tags=59%, list=20%, signal=49%	PRTN3, CR1, ADD2, PLSCR1, ITGAM, CD14, ERLIN1, CD226, CD36, IL6ST	ADD2, CD14, CD36, CR1, STOM, IL6ST, ITGAM, PECAM1, PLSCR1, PPP2CA, MAPK1, PRTN3, ADAM17, ERLIN1, CD226, ERLIN2, CORO1C
Cluster 2	1h post exercise	CC	GO:0045121	membrane raft	17	0.569602	2.03148	0.0023124	0.0293779	0.0238431	92	tags=59%, list=20%, signal=49%	PRTN3, CR1, ADD2, PLSCR1, ITGAM, CD14, ERLIN1, CD226, CD36, IL6ST	ADD2, CD14, CD36, CR1, STOM, IL6ST, ITGAM, PECAM1, PLSCR1, PPP2CA, MAPK1, PRTN3, ADAM17, ERLIN1, CD226, ERLIN2, CORO1C
Cluster 2	Post exercise	MF	GO:0060089	molecular transducer activity	26	-0.619974	-1.75072	0.000412402	0.0307377	0.0288826	96	tags=50%, list=21%, signal=42%	SORT1, IL6ST, SIGMAR1, LILRA3, CD14, CR1, ATRN, ANPEP, OSCAR, LRP1, CSF2RA, FCN1, FCGR1A	ANPEP, CD14, CD36, CD47, CR1, CSF2RA, ENG, FCGR1A, FCN1, GP1BB, IL6ST, ITGA2, ITGAV, LRP1, PECAM1, SORT1, SEC62, ATRN, SIGMAR1, LILRA3, CD93, PLXNB2, IL17RA, CLEC1B, INPP5K, OSCAR
Cluster 2	1h post exercise	MF	GO:0060089	molecular transducer activity	26	0.582667	2.25053	6.3736e-05	0.0021593	0.00175249	105	tags=65%, list=22%, signal=54%	LILRA3, OSCAR, CD93, CR1, CSF2RA, ANPEP, FCN1, LRP1, ATRN, CD14, FCGR1A, ENG, CD36, GP1BB, IL6ST, CLEC1B, ITGAV	ANPEP, CD14, CD36, CD47, CR1, CSF2RA, ENG, FCGR1A, FCN1, GP1BB, IL6ST, ITGA2, ITGAV, LRP1, PECAM1, SORT1, SEC62, ATRN, SIGMAR1, LILRA3, CD93, PLXNB2, IL17RA, CLEC1B, INPP5K, OSCAR
Cluster 2	1h post exercise	BP	GO:0032501	multicellular organismal process	199	0.347558	1.63988	0.000439743	0.00862513	0.00700016	152	tags=42%, list=32%, signal=50%	CTSG, ELANE, BST1, MPO, VCAN, CD93, S100A9, KRT2, PADI4, CR1, COX5B, ADD2, AZGP1, ANPEP, SIRPA, S100A8, DLG4, FCN1, CST3, SEMA4A, LRP1, PLSCR1, FCGRT, MPV17, TPM2, ORM2, DYSF, ATRN, CEMIP, ITGAM, CD14, ECM1, TIMP1, THBS4, FN1, HSPG2, TPM1, GM2A, SLC44A1, ESAM, SPARC, TNFSF13, ENG, TGFB1, CD226, TGFBI, CD36, GP1BB, TPT1, ACP3, IL6ST, SERPINE1, MDK, PDGFC, TMEM30A, LAMA4, HYAL3, ITGAV, F12, CTSZ, I…	ACADVL, ACOX1, ACP3, ADD2, ADH5, ALDH1A1, ALDH3A2, ALDOA, ANPEP, APLP2, ARL3, ARRB1, ARSB, AZGP1, BRAF, BSG, BST1, BTD, C3, C5, CALR, CAT, CCND3, CD14, CD36, CD47, SEPTIN7, CNP, COX5B, CPT2, CR1, VCAN, CST3, CTSB, CTSG, CTSZ, DAD1, CYB5R3, DLD, DLG4, DYRK1A, ECM1, ELANE, ENG, ENO1, F12, ACSL1, ACSL4, FCGRT, FCN1, FN1, GDI1, B4GALT1, GM2A, GNG5, GP1BB, GPI, GPX4, GSS, GSTP1, HPRT1, HRG, HSD17B4, H…
Cluster 2	1h post exercise	BP	GO:0048519	negative regulation of biological process	139	0.34887	1.61078	0.00264537	0.0311319	0.0252666	158	tags=45%, list=34%, signal=43%	CTSG, PRTN3, ELANE, MPO, ACTR6, CDA, CR1, ADD2, AZGP1, SIRPA, DLG4, FCN1, CST3, SEMA4A, LRP1, PLSCR1, DYSF, CEMIP, ITGAM, ECM1, HP, TIMP1, THBS4, FN1, HSPG2, TPM1, ERLIN1, SPARC, QSOX1, ENG, TGFB1, TGFBI, CD36, GP1BB, TPT1, IL6ST, SERPINE1, MDK, LAMA4, HYAL3, ITGAV, F12, CTSZ, ITGA5, SOD1, TSPAN15, ALAD, TXN, PDGFA, VAT1, F11R, DNAJC5, KLKB1, HTRA2, HRG, CHSY1, CD47, SLC18A2, ERLIN2, SORT1, PPIF,…	ACADVL, ADD2, ALAD, ALDH1A1, ARF1, ARRB1, AZGP1, BRAF, C5, CALR, CAT, CCND3, CD36, CD47, CDA, AP2M1, CR1, CST3, CTSG, CTSZ, DAD1, DLG4, DYRK1A, ECM1, ELANE, ENG, ENO1, F12, FCN1, FHIT, FN1, GBE1, GDI1, GDI2, B4GALT1, GP1BB, GPI, GPX4, GSTP1, HP, HRG, HSPG2, IL6ST, INPPL1, ITGA5, ITGAM, ITGAV, KLKB1, LAMA4, LRP1, MDK, MGAT5, MPO, MTM1, PEBP1, PAFAH1B1, SERPINE1, PDGFA, PFN1, PLSCR1, PPIA, PPP2CA, …
Cluster 2	1h post exercise	BP	GO:0007162	negative regulation of cell adhesion	10	0.627304	1.99178	0.00457327	0.0469075	0.0380701	96	tags=70%, list=21%, signal=57%	CTSG, CR1, HSPG2, TGFB1, TGFBI, SERPINE1, MDK	CR1, CTSG, HRG, HSPG2, MDK, SERPINE1, TGFB1, TGFBI, CORO1C, PLXNB2
Cluster 2	1h post exercise	BP	GO:0048523	negative regulation of cellular process	121	0.349571	1.59309	0.00397839	0.0419607	0.0340553	158	tags=45%, list=34%, signal=41%	CTSG, PRTN3, ELANE, MPO, ACTR6, CDA, CR1, ADD2, AZGP1, SIRPA, DLG4, CST3, SEMA4A, LRP1, PLSCR1, DYSF, CEMIP, ITGAM, ECM1, HP, TIMP1, FN1, HSPG2, TPM1, ERLIN1, SPARC, QSOX1, ENG, TGFB1, TGFBI, CD36, GP1BB, TPT1, IL6ST, SERPINE1, MDK, ITGAV, CTSZ, ITGA5, SOD1, TSPAN15, TXN, PDGFA, VAT1, F11R, DNAJC5, HTRA2, HRG, CD47, SLC18A2, ERLIN2, SORT1, PPIF, ACADVL, GPX4	ACADVL, ADD2, ARF1, ARRB1, AZGP1, BRAF, C5, CALR, CAT, CCND3, CD36, CD47, CDA, AP2M1, CR1, CST3, CTSG, CTSZ, DAD1, DLG4, DYRK1A, ECM1, ELANE, ENG, ENO1, FN1, GBE1, GDI1, GDI2, B4GALT1, GP1BB, GPI, GPX4, GSTP1, HP, HRG, HSPG2, IL6ST, INPPL1, ITGA5, ITGAM, ITGAV, LRP1, MDK, MGAT5, MPO, MTM1, PEBP1, PAFAH1B1, SERPINE1, PDGFA, PFN1, PLSCR1, PPIA, PPP2CA, PRKAA1, PRKCB, MAPK1, PRTN3, QSOX1, RAP1B, ROC…
Cluster 2	1h post exercise	BP	GO:0051241	negative regulation of multicellular organismal process	38	0.467686	1.90894	0.00118733	0.0189634	0.0153907	143	tags=58%, list=31%, signal=44%	CTSG, ELANE, CR1, SIRPA, CST3, SEMA4A, ECM1, TIMP1, THBS4, FN1, HSPG2, SPARC, TGFB1, SERPINE1, MDK, LAMA4, F12, SOD1, PDGFA, KLKB1, HRG, CHSY1	ALDH1A1, ARRB1, CALR, CR1, CST3, CTSG, ECM1, ELANE, F12, FN1, GDI1, GSTP1, HRG, HSPG2, KLKB1, LAMA4, MDK, SERPINE1, PDGFA, PPP2CA, PROS1, ROCK1, SOD1, SPARC, ADAM17, TGFB1, THBS4, TIMP1, SEMA4B, CHSY1, STAB1, DICER1, CORO1C, DNAJB11, RTN4, SEMA4A, SIRPA, PGAM5
Cluster 2	1h post exercise	BP	GO:1990266	neutrophil migration	11	0.626763	2.04019	0.00327434	0.0369768	0.0300104	96	tags=64%, list=21%, signal=52%	PRTN3, BST1, S100A9, S100A8, CXCL3, THBS4, MDK	BSG, BST1, CXCL3, MDK, PECAM1, PPIA, PRTN3, S100A8, S100A9, THBS4, MOSPD2
Cluster 2	Post exercise	CC	GO:0005886	plasma membrane	184	-0.461845	-1.49092	0.000130369	0.0161947	0.0152173	135	tags=40%, list=29%, signal=47%	TOLLIP, CD93, ADAM17, RALA, ANO10, AGPAT3, MTM1, SH3BGRL3, RAP1B, PIEZO1, C5, PROS1, NCSTN, CPM, SLC44A1, CD109, DAGLB, SEMA4A, RAB10, TACC2, GCA, SORT1, IGKC, FHIT, CARD9, IL6ST, TGFB1, SLC18A2, TPM1, SIGMAR1, RALB, CTSG, C3, SLC22A18, PLSCR1, APLP2, LILRA3, NLN, SPARC, ITIH4, MCEMP1, HRG, SERPINE1, S100A9, SIGLEC9, MAGT1, CST3, RAB31, B4GALT1, HYAL3, MGST1, CD14, TGFBI, DLG4, CR1, ATRN, PRTN3, …	A1BG, ACP3, ADD2, ALDH3B1, ANPEP, APLP2, ARF1, ARRB1, ATP6V0A1, AZGP1, BRAF, BSG, BST1, C3, C4A, C5, C8G, CALR, CD14, CD36, CD47, SEPTIN7, AP2M1, CP, CPM, CR1, CSF2RA, CST3, CTSB, CTSG, CTSZ, DLG4, ENG, ENO1, ENO2, STOM, F12, ACSL4, FCGR1A, FCGRT, FCN1, FHIT, FN1, B4GALT1, GM2A, GNAI1, GNB2, GNG5, GOT2, GP1BB, GPI, GSR, HRG, HSPG2, IDE, IGKC, IGLC2, IL6ST, INPPL1, ITGA2, ITGA2B, ITGA5, ITGAM, ITG…
Cluster 2	1h post exercise	CC	GO:0005886	plasma membrane	184	0.370078	1.73478	0.000132636	0.00353064	0.00286547	205	tags=57%, list=44%, signal=52%	CTSG, PRTN3, BST1, LILRA3, OSCAR, CD93, MCEMP1, VNN2, S100A9, KRT2, CR1, ADD2, CSF2RA, AZGP1, ANPEP, SIRPA, S100A8, DLG4, FCN1, CST3, SEMA4A, LRP1, CPM, GCA, PLSCR1, FCGRT, DYSF, ATRN, CEMIP, SIGLEC9, ITGAM, MGST1, CD14, FN1, A1BG, HSPG2, TPM1, GM2A, SLC44A1, ESAM, FCGR1A, SPARC, ENG, PLSCR3, TGFB1, CD226, TGFBI, CD36, GP1BB, ACP3, IL6ST, SH3BGRL3, SERPINE1, PDGFC, ALDH3B1, TMEM30A, HYAL3, CLEC1B…	A1BG, ACP3, ADD2, ALDH3B1, ANPEP, APLP2, ARF1, ARRB1, ATP6V0A1, AZGP1, BRAF, BSG, BST1, C3, C4A, C5, C8G, CALR, CD14, CD36, CD47, SEPTIN7, AP2M1, CP, CPM, CR1, CSF2RA, CST3, CTSB, CTSG, CTSZ, DLG4, ENG, ENO1, ENO2, STOM, F12, ACSL4, FCGR1A, FCGRT, FCN1, FHIT, FN1, B4GALT1, GM2A, GNAI1, GNB2, GNG5, GOT2, GP1BB, GPI, GSR, HRG, HSPG2, IDE, IGKC, IGLC2, IL6ST, INPPL1, ITGA2, ITGA2B, ITGA5, ITGAM, ITG…
Cluster 2	1h post exercise	CC	GO:0031093	platelet alpha granule lumen	15	0.591209	2.0564	0.00271937	0.0313428	0.0254378	140	tags=80%, list=30%, signal=58%	CFD, ORM2, TIMP1, FN1, A1BG, SPARC, QSOX1, TGFB1, SERPINE1, VWF, PDGFA, HRG	A1BG, ALDOA, CFD, FN1, HRG, ORM2, SERPINE1, PDGFA, PROS1, QSOX1, SPARC, TGFB1, TIMP1, VWF, OLA1
Cluster 2	1h post exercise	BP	GO:0008284	positive regulation of cell population proliferation	34	0.487924	1.96832	0.00142664	0.0212573	0.0172525	105	tags=50%, list=22%, signal=42%	PRTN3, ELANE, BST1, VCAN, CR1, CSF2RA, ECM1, TIMP1, THBS4, FN1, HSPG2, TNFSF13, TGFB1, IL6ST, MDK, PDGFC, ITGAV	BST1, CALR, CD47, CR1, CSF2RA, VCAN, ECM1, ELANE, FN1, B4GALT1, GNG5, HSPG2, IL6ST, ITGA2, ITGAV, LAMB1, MDK, PNP, PDGFA, PRKAA1, MAPK1, PRTN3, ST6GAL1, ADAM17, TGFB1, THBS4, TIMP1, TNFSF13, DNAJA2, MCTS1, MYDGF, PDGFC, RTN4, PDGFD
Cluster 2	1h post exercise	BP	GO:0050778	positive regulation of immune response	37	0.515519	2.09435	0.000106602	0.00290685	0.0023592	92	tags=49%, list=20%, signal=42%	CTSG, ELANE, S100A9, CR1, S100A8, FCN1, PLSCR1, CFD, ITGAM, CD14, FCGR1A, HPX, TNFSF13, CFHR1, TGFB1, CD226, CD36, IL6ST	BRAF, C3, C4A, C5, C8G, CASP6, CD14, CD36, CD47, CR1, CTSG, CFD, ELANE, FCGR1A, FCN1, CFHR1, HPX, HRG, IGKC, IL6ST, ITGAM, PLSCR1, PPP2CA, PRKCB, MAPK1, S100A8, S100A9, TGFB1, YES1, YWHAE, TNFSF13, USP15, CD226, GPR108, RTN4, CARD9, CLPB
Cluster 2	1h post exercise	BP	GO:0048584	positive regulation of response to stimulus	87	0.397889	1.77494	0.000490003	0.00944524	0.00766575	150	tags=52%, list=32%, signal=43%	CTSG, ELANE, S100A9, CR1, S100A8, DLG4, FCN1, WRAP53, PLSCR1, CFD, ITGAM, CD14, ECM1, THBS4, FN1, FCGR1A, HPX, TNFSF13, CFHR1, ENG, TGFB1, CD226, CD36, ACP3, IL6ST, SERPINE1, MDK, PDGFC, ITGAV, F12, ITGA5, VWF, GLIPR2, SOD1, TXN, PDGFA, F11R, TMED4, SLC44A2, HTRA2, HRG, CHSY1, CD47, IGKC, PDGFD	ACP3, ARRB1, BRAF, C3, C4A, C5, C8G, CALR, CASP6, CAT, CD14, CD36, CD47, CR1, CTSG, CFD, DLG4, ECM1, ELANE, ENG, F12, FCGR1A, FCN1, FN1, CFHR1, HPX, HRG, IGKC, IL6ST, ITGA2, ITGA5, ITGAM, ITGAV, LAMB1, MDK, MGAT5, PAFAH1B1, SERPINE1, PDGFA, PLSCR1, PPIA, PPP2CA, PRKCB, MAPK1, RALA, RALB, RAP1B, ROCK1, S100A8, S100A9, SOD1, ADAM17, TGFB1, THBS4, TXN, VWF, YES1, YWHAE, SHOC2, TNFSF13, USP15, TFG, C…
Cluster 2	1h post exercise	BP	GO:0002440	production of molecular mediator of immune response	10	0.654474	2.07805	0.00238639	0.0296443	0.0240593	87	tags=70%, list=19%, signal=58%	ELANE, CR1, HPX, TNFSF13, TGFB1, CD226, CD36	CD36, CR1, ELANE, GPI, HPX, TGFB1, TNFSF13, CD226, IGKV3-20, CARD9
Cluster 2	1h post exercise	MF	GO:0044877	protein-containing complex binding	63	0.388923	1.67243	0.00371831	0.0395911	0.0321322	140	tags=49%, list=30%, signal=40%	MPO, ACTR6, CD93, ADD2, DLG4, LRP1, WRAP53, FCGRT, CD2BP2, TPM2, ITGAM, THBS4, FN1, HSPG2, TPM1, FCGR1A, SPARC, ENG, ATAD2, CD226, TGFBI, CD36, ITGAV, ITGA5, VWF, ALAD, TPM4, PDGFA, F11R, TPM3, HRG	ADD2, ALAD, BRAF, C4A, C8G, CALR, CD36, CTSB, DLG4, ENG, FCGR1A, FCGRT, FN1, GNAI1, GNB2, HRG, HSPG2, ITGA2, ITGA2B, ITGA5, ITGAM, ITGAV, LRP1, MPO, PAFAH1B1, PDGFA, PPIA, PRKAA1, PRKCB, RAP1B, SORT1, FSCN1, SPARC, ADAM17, TGFBI, THBS4, TPM1, TPM2, TPM3, TPM4, VWF, YWHAE, RAB7A, PSTPIP2, SMC4, CD2BP2, TXNRD2, CD226, STRAP, CD93, STAB1, WBP2, CORO1C, ATAD2, OLA1, F11R, WRAP53, P3H1, ACTR6, WDR13, …
Cluster 2	1h post exercise	CC	GO:0043235	receptor complex	15	0.605088	2.10467	0.00144504	0.0212573	0.0172525	108	tags=73%, list=23%, signal=58%	CSF2RA, DLG4, LRP1, ITGAM, CD14, ENG, CD36, GP1BB, IL6ST, ITGAV, ITGA5	CD14, CD36, CSF2RA, DLG4, ENG, GP1BB, IL6ST, ITGA2, ITGA2B, ITGA5, ITGAM, ITGAV, LRP1, PLXNB2, HTRA2
Cluster 2	1h post exercise	MF	GO:0048018	receptor ligand activity	15	0.582696	2.02679	0.00357032	0.0387535	0.0314524	124	tags=73%, list=26%, signal=56%	CTSG, SEMA4A, CXCL3, TIMP1, THBS4, TNFSF13, TGFB1, MDK, PDGFC, FAM3C, PDGFA	C5, CTSG, GPI, CXCL3, MDK, PDGFA, TGFB1, THBS4, TIMP1, TNFSF13, FAM3C, SEMA4B, PDGFC, SEMA4A, PDGFD
Cluster 2	1h post exercise	BP	GO:0050790	regulation of catalytic activity	52	0.414079	1.74443	0.00242339	0.0297731	0.0241638	152	tags=52%, list=32%, signal=39%	PRTN3, ELANE, S100A9, CR1, S100A8, DLG4, CST3, LRP1, WRAP53, PLSCR1, CEMIP, ITGAM, ECM1, HP, TIMP1, FCGR1A, SERPINE1, PDGFC, AGRN, SOD1, TXN, PDGFA, NCSTN, HTRA2, HRG, PDGFD, SORT1	CCND3, CR1, CST3, DLG4, ECM1, ELANE, FCGR1A, GSTP1, HP, HRG, ITGAM, LRP1, MGAT5, SERPINE1, PDGFA, PLSCR1, PPIA, PPP2CA, MAPK1, PRTN3, RALB, ROCK1, SORT1, S100A8, S100A9, SOD1, ADAM17, TIMP1, TSC1, TXN, YWHAG, AIFM1, TBC1D9B, NCSTN, CORO1C, PLXNB2, B3GAT3, HTRA2, TAOK3, INPP5K, CYCS, WRAP53, CCDC88A, PDGFC, CEMIP, CARD9, TBC1D15, MTMR9, PDGFD, CPEB2, SMCR8, AGRN
Cluster 2	1h post exercise	BP	GO:0030155	regulation of cell adhesion	34	0.472239	1.90504	0.00268237	0.0312385	0.0253531	108	tags=50%, list=23%, signal=41%	CTSG, ELANE, BST1, CR1, SIRPA, FN1, HSPG2, TPM1, TGFB1, TGFBI, CD36, IL6ST, SERPINE1, MDK, LAMA4, ITGAV, ITGA5	BRAF, BST1, CALR, CD36, CD47, CR1, CTSG, ELANE, FN1, HRG, HSPG2, IL6ST, ITGA2, ITGA5, ITGAV, LAMA4, LAMB1, MDK, PNP, SERPINE1, PPP2CA, ROCK1, ST6GAL1, TGFB1, TGFBI, TPM1, TSC1, YES1, SLK, PIEZO1, CORO1C, PLXNB2, F11R, SIRPA
Cluster 2	1h post exercise	BP	GO:0031323	regulation of cellular metabolic process	126	0.369155	1.69121	0.00107689	0.0177053	0.0143696	153	tags=47%, list=33%, signal=43%	ELANE, BST1, ACTR6, CDA, S100A9, CR1, SIRPA, S100A8, DLG4, FCN1, LRP1, WRAP53, PLSCR1, MPV17, ORM2, CEMIP, ITGAM, CD14, ECM1, HP, TIMP1, THBS4, FN1, ERLIN1, FCGR1A, HPX, TNFSF13, QSOX1, ENG, ATAD2, TGFB1, CD226, CD36, IL6ST, SERPINE1, MDK, PDGFC, ITGAV, F12, CTSZ, ITGA5, AGRN, SOD1, TSPAN15, TXN, PDGFA, PGAM1, NCSTN, F11R, KLKB1, HTRA2, HRG, NFE2, CD47, SLC18A2, PDGFD, ERLIN2, SORT1, PPIF	ACADVL, ARRB1, ATP6V0A1, BRAF, BST1, C3, C5, CALR, CCND3, CD14, CD36, CD47, CDA, CR1, CTSZ, DLG4, DYRK1A, ECM1, ELANE, ENG, ENO1, F12, FCGR1A, FCN1, FN1, GPI, GSTP1, HP, HPRT1, HPX, HRG, IDE, IL6ST, INPPL1, ITGA2, ITGA5, ITGAM, ITGAV, KLKB1, LRP1, MDK, ME2, MGAT5, MPV17, MTM1, NFE2, PNP, ORM2, SERPINE1, PDGFA, PECAM1, PFN1, PGAM1, PLSCR1, PPIA, PPP1R7, PPP2CA, PRKAA1, PRKCB, MAPK1, QSOX1, RALB, R…
Cluster 2	1h post exercise	BP	GO:0031347	regulation of defense response	38	0.455051	1.85737	0.00238639	0.0296443	0.0240593	106	tags=47%, list=23%, signal=40%	ELANE, BST1, S100A9, CR1, SIRPA, S100A8, FCN1, PLSCR1, CD14, FCGR1A, HPX, TGFB1, CD226, CD36, IL6ST, SERPINE1, MDK, F12	BST1, C3, CASP6, CD14, CD36, CD47, CR1, ELANE, F12, FCGR1A, FCN1, GSTP1, HPX, IL6ST, KLKB1, MDK, SERPINE1, PLSCR1, PPP2CA, PSMA1, S100A8, S100A9, SOD1, TGFB1, YES1, YWHAE, USP15, ZMPSTE24, CD226, NT5C2, MKRN2, IL17RA, GPR108, RTN4, CARD9, CLPB, SIRPA, DAGLB
Cluster 2	1h post exercise	BP	GO:0050776	regulation of immune response	42	0.486816	1.99972	0.000252911	0.00577051	0.00468334	92	tags=45%, list=20%, signal=40%	CTSG, ELANE, S100A9, CR1, S100A8, FCN1, PLSCR1, CFD, ITGAM, CD14, ECM1, FCGR1A, HPX, TNFSF13, CFHR1, TGFB1, CD226, CD36, IL6ST	BRAF, C3, C4A, C5, C8G, CASP6, CD14, CD36, CD47, CR1, CTSG, CFD, ECM1, ELANE, FCGR1A, FCN1, CFHR1, HPX, HRG, IGKC, IL6ST, INPPL1, ITGAM, PLSCR1, PPP2CA, PRKCB, MAPK1, PSMA1, S100A8, S100A9, TGFB1, YES1, YWHAE, TNFSF13, USP15, CD226, MKRN2, GPR108, RTN4, CARD9, CLPB, SMCR8
Cluster 2	1h post exercise	BP	GO:0045088	regulation of innate immune response	18	0.57566	2.08393	0.000948031	0.0163061	0.013234	87	tags=56%, list=19%, signal=47%	S100A9, CR1, S100A8, FCN1, PLSCR1, CD14, HPX, TGFB1, CD226, CD36	CASP6, CD14, CD36, CR1, FCN1, HPX, PLSCR1, PPP2CA, S100A8, S100A9, TGFB1, YWHAE, USP15, CD226, GPR108, RTN4, CARD9, CLPB
Cluster 2	1h post exercise	BP	GO:0065009	regulation of molecular function	67	0.406055	1.75745	0.00194242	0.0268102	0.0217592	153	tags=51%, list=33%, signal=40%	PRTN3, ELANE, S100A9, CR1, ADD2, S100A8, DLG4, CST3, LRP1, WRAP53, PLSCR1, TPM2, CEMIP, ITGAM, ECM1, HP, TIMP1, TPM1, FCGR1A, CFHR1, CD36, SERPINE1, PDGFC, ITGAV, AGRN, SOD1, TXN, PDGFA, NCSTN, HTRA2, HRG, PDGFD, SORT1, PPIF	ADD2, ARRB1, CCND3, CD36, CR1, CST3, DLG4, ECM1, ELANE, FCGR1A, NIPSNAP2, GSTP1, CFHR1, HP, HRG, IDE, ITGAM, ITGAV, LRP1, MGAT5, SERPINE1, PDGFA, PFN1, PLSCR1, PPIA, PPP2CA, MAPK1, PRTN3, RALB, ROCK1, SORT1, S100A8, S100A9, SOD1, ADAM17, TIMP1, TPM1, TPM2, TSC1, TXN, YWHAE, YWHAG, AIFM1, PPIF, GABARAPL2, TBC1D9B, NCSTN, CORO1C, PLXNB2, B3GAT3, HTRA2, TAOK3, DNAJB11, INPP5K, CYCS, WRAP53, CCDC88A,…
Cluster 2	1h post exercise	BP	GO:0052547	regulation of peptidase activity	14	0.614727	2.09906	0.0022014	0.0293779	0.0238431	140	tags=79%, list=30%, signal=57%	S100A9, CR1, S100A8, CST3, LRP1, ECM1, TIMP1, SERPINE1, NCSTN, HTRA2, HRG	CR1, CST3, ECM1, HRG, LRP1, SERPINE1, S100A8, S100A9, TIMP1, AIFM1, NCSTN, HTRA2, CYCS, CARD9
Cluster 2	1h post exercise	BP	GO:0050730	regulation of peptidyl-tyrosine phosphorylation	17	0.548981	1.95794	0.00464763	0.0472368	0.0383374	150	tags=76%, list=32%, signal=54%	BST1, DLG4, THBS4, FCGR1A, HPX, TGFB1, CD36, IL6ST, PDGFC, ITGA5, PDGFA, HRG, PDGFD	BST1, CD36, DLG4, FCGR1A, HPX, HRG, IL6ST, ITGA5, PDGFA, PECAM1, PPP2CA, ADAM17, TGFB1, THBS4, YES1, PDGFC, PDGFD
Cluster 2	1h post exercise	BP	GO:0034097	response to cytokine	27	0.49268	1.9142	0.00487071	0.0484964	0.0393597	145	tags=59%, list=31%, signal=43%	CTSG, LILRA3, CSF2RA, SIRPA, PLSCR1, CD14, ECM1, CXCL3, TIMP1, HPX, IL6ST, HYAL3, ALAD, ITIH4, HTRA2, CD47	ALAD, CD14, CD47, CSF2RA, CTSG, ECM1, ACSL1, CXCL3, GSTP1, HPX, IL6ST, ITIH4, PAFAH1B1, PLSCR1, MAPK1, ADAM17, TIMP1, HYAL3, LILRA3, DICER1, IL17RA, HTRA2, INPP5K, TOLLIP, TXNDC17, VPS26B, SIRPA
Cluster 2	1h post exercise	BP	GO:0050896	response to stimulus	253	0.33478	1.58052	0.00124256	0.0192941	0.0156591	153	tags=40%, list=33%, signal=58%	CTSG, PRTN3, ELANE, BST1, MPO, LILRA3, LYZ, OSCAR, CDA, S100A9, PADI4, CR1, CSF2RA, AZGP1, SIRPA, S100A8, DLG4, FCN1, CST3, IPO8, SEMA4A, LRP1, WRAP53, PLSCR1, FCGRT, MPV17, CFD, ORM2, DYSF, ATRN, SIGLEC9, ITGAM, MGST1, CD14, ECM1, HP, CXCL3, TIMP1, RNASE2, THBS4, FN1, HSPG2, TPM1, ERLIN1, FCGR1A, HPX, TNFSF13, CFHR1, ENG, PLSCR3, TGFB1, CD226, TGFBI, CD36, GP1BB, TPT1, ACP3, IL6ST, SERPINE1, MDK…	ACADVL, ACP3, ADH5, ALAD, ALDH1A1, ALDH3B1, APLP2, ARF1, ARL3, ARRB1, ARSB, AZGP1, BRAF, BSG, BST1, C3, C4A, C5, C8G, CALR, CASP6, CAT, CCND3, CD14, CD36, CD47, CDA, CNP, CP, CR1, CSF2RA, CST3, CTSB, CTSG, CFD, DLG4, DYRK1A, ECM1, ELANE, ENG, ENO1, EPHX1, ESD, ETFDH, F12, ACSL1, FCGR1A, FCGRT, FCN1, FHIT, FN1, FUCA2, GDI1, GDI2, B4GALT1, GNAI1, GNB2, GNG5, GOT1, GOT2, GP1BB, GPI, GPX4, CXCL3, GSR…
Cluster 2	1h post exercise	BP	GO:0009611	response to wounding	29	0.51943	2.03655	0.000544955	0.010325	0.00837976	140	tags=69%, list=30%, signal=52%	CTSG, PLSCR1, TIMP1, FN1, TPM1, TGFB1, CD36, GP1BB, IL6ST, SERPINE1, MDK, ITGAV, F12, ITGA5, VWF, SOD1, PDGFA, F11R, KLKB1, HRG	BRAF, CD36, CTSG, F12, FN1, B4GALT1, GP1BB, HRG, IL6ST, ITGA2, ITGA5, ITGAV, KLKB1, MDK, SERPINE1, PDGFA, PLSCR1, PPIA, PROS1, SOD1, ADAM17, TGFB1, TIMP1, TPM1, VWF, CHMP2A, F11R, CD109, ANO6
Cluster 2	1h post exercise	MF	GO:0017171	serine hydrolase activity	10	0.649599	2.06257	0.00264537	0.0311319	0.0252666	137	tags=80%, list=29%, signal=58%	CTSG, PRTN3, ELANE, CFD, HP, F12, KLKB1, HTRA2	APEH, CTSG, CFD, ELANE, F12, HP, KLKB1, PRTN3, HTRA2, NCEH1
Cluster 2	Post exercise	CC	GO:0098552	side of membrane	35	-0.590682	-1.72183	0.000348605	0.0299801	0.0281707	40	tags=29%, list=9%, signal=28%	B4GALT1, CD14, DLG4, AZGP1, ANPEP, CTSB, FCGRT, CSF2RA, FCN1, FCGR1A	ANPEP, AZGP1, BST1, CALR, CD14, CD36, AP2M1, CP, CPM, CSF2RA, CTSB, DLG4, ENG, FCGR1A, FCGRT, FCN1, B4GALT1, GM2A, GNAI1, GNB2, GNG5, GSR, IDE, IL6ST, ITGA2, ITGA2B, ITGA5, ITGAM, ITGAV, PECAM1, VNN2, CD226, RAB21, HTRA2, CD109
Cluster 2	1h post exercise	CC	GO:0098552	side of membrane	35	0.502533	2.033	0.000407845	0.00814233	0.00660831	190	tags=77%, list=41%, signal=50%	BST1, VNN2, CSF2RA, AZGP1, ANPEP, DLG4, FCN1, CPM, FCGRT, ITGAM, CD14, GM2A, FCGR1A, ENG, CD226, CD36, IL6ST, ITGAV, ITGA5, HTRA2, CTSB, GNG5, CD109, B4GALT1, CP, ITGA2, ITGA2B	ANPEP, AZGP1, BST1, CALR, CD14, CD36, AP2M1, CP, CPM, CSF2RA, CTSB, DLG4, ENG, FCGR1A, FCGRT, FCN1, B4GALT1, GM2A, GNAI1, GNB2, GNG5, GSR, IDE, IL6ST, ITGA2, ITGA2B, ITGA5, ITGAM, ITGAV, PECAM1, VNN2, CD226, RAB21, HTRA2, CD109
Cluster 2	1h post exercise	MF	GO:0030546	signaling receptor activator activity	16	0.594592	2.09649	0.00161071	0.0230242	0.0186865	124	tags=75%, list=26%, signal=57%	CTSG, SEMA4A, CXCL3, TIMP1, THBS4, TNFSF13, ENG, TGFB1, MDK, PDGFC, FAM3C, PDGFA	C5, CTSG, ENG, GPI, CXCL3, MDK, PDGFA, TGFB1, THBS4, TIMP1, TNFSF13, FAM3C, SEMA4B, PDGFC, SEMA4A, PDGFD
Cluster 2	Post exercise	MF	GO:0038023	signaling receptor activity	26	-0.619974	-1.75072	0.000412402	0.0307377	0.0288826	96	tags=50%, list=21%, signal=42%	SORT1, IL6ST, SIGMAR1, LILRA3, CD14, CR1, ATRN, ANPEP, OSCAR, LRP1, CSF2RA, FCN1, FCGR1A	ANPEP, CD14, CD36, CD47, CR1, CSF2RA, ENG, FCGR1A, FCN1, GP1BB, IL6ST, ITGA2, ITGAV, LRP1, PECAM1, SORT1, SEC62, ATRN, SIGMAR1, LILRA3, CD93, PLXNB2, IL17RA, CLEC1B, INPP5K, OSCAR
Cluster 2	1h post exercise	MF	GO:0038023	signaling receptor activity	26	0.582667	2.25053	6.3736e-05	0.0021593	0.00175249	105	tags=65%, list=22%, signal=54%	LILRA3, OSCAR, CD93, CR1, CSF2RA, ANPEP, FCN1, LRP1, ATRN, CD14, FCGR1A, ENG, CD36, GP1BB, IL6ST, CLEC1B, ITGAV	ANPEP, CD14, CD36, CD47, CR1, CSF2RA, ENG, FCGR1A, FCN1, GP1BB, IL6ST, ITGA2, ITGAV, LRP1, PECAM1, SORT1, SEC62, ATRN, SIGMAR1, LILRA3, CD93, PLXNB2, IL17RA, CLEC1B, INPP5K, OSCAR
Cluster 2	1h post exercise	MF	GO:0005102	signaling receptor binding	61	0.484719	2.0748	2.0525e-05	0.000956123	0.000775989	131	tags=56%, list=28%, signal=46%	CTSG, PRTN3, S100A9, S100A8, DLG4, FCN1, SEMA4A, LRP1, PLSCR1, ITGAM, ECM1, CXCL3, TIMP1, THBS4, FN1, HSPG2, TNFSF13, ENG, TGFB1, CD226, TGFBI, CD36, IL6ST, SERPINE1, MDK, PDGFC, LAMA4, ITGAV, ITGA5, VWF, FAM3C, PDGFA, NCSTN, F11R	ARRB1, C3, C5, CALR, CD36, AP2M1, CTSG, DLG4, ECM1, ENG, FCN1, FN1, GNAI1, GPI, CXCL3, HRG, HSPG2, IL6ST, ITGA2, ITGA2B, ITGA5, ITGAM, ITGAV, LAMA4, LRP1, MDK, SERPINE1, PDGFA, PLSCR1, PPIA, PPP2CA, PRTN3, RALA, S100A8, S100A9, SCP2, ADAM17, TGFB1, TGFBI, THBS4, TIMP1, VWF, YES1, YWHAG, TNFSF13, USP15, FAM3C, SEMA4B, CD226, STRAP, GABARAPL2, NCSTN, IL17RA, F11R, DNAJB11, RAB8B, TOLLIP, CCDC88A, P…
Cluster 2	1h post exercise	MF	GO:0030545	signaling receptor regulator activity	16	0.594592	2.09649	0.00161071	0.0230242	0.0186865	124	tags=75%, list=26%, signal=57%	CTSG, SEMA4A, CXCL3, TIMP1, THBS4, TNFSF13, ENG, TGFB1, MDK, PDGFC, FAM3C, PDGFA	C5, CTSG, ENG, GPI, CXCL3, MDK, PDGFA, TGFB1, THBS4, TIMP1, TNFSF13, FAM3C, SEMA4B, PDGFC, SEMA4A, PDGFD
Cluster 2	1h post exercise	MF	GO:0005198	structural molecule activity	18	0.659922	2.38896	1.63363e-05	0.000794086	0.00064448	122	tags=83%, list=26%, signal=64%	VCAN, KRT2, ADD2, TPM2, ECM1, FN1, HSPG2, TPM1, SPARC, TGFBI, TMEM30A, LAMA4, VWF, AGRN, TPM4	ADD2, SEPTIN7, CPOX, VCAN, ECM1, FN1, HSPG2, KRT2, LAMA4, LAMB1, SPARC, TGFBI, TPM1, TPM2, TPM4, VWF, TMEM30A, AGRN
Cluster 2	1h post exercise	CC	GO:0005775	vacuolar lumen	26	0.538186	2.07872	0.000554114	0.010325	0.00837976	70	tags=42%, list=15%, signal=38%	CTSG, PRTN3, ELANE, MPO, VCAN, LYZ, GCA, ORM2, RNASE2, HSPG2, GM2A	ACLY, ACP2, ARSB, C3, VCAN, CTSB, CTSG, CYB5R3, ELANE, FUCA2, GDI2, GM2A, GNS, HSPG2, LYZ, MAN2B1, MPO, ORM2, MAPK1, PRTN3, RNASE2, GGH, VAT1, GCA, TOLLIP, AGRN
Cluster 2	1h post exercise	BP	GO:0042060	wound healing	26	0.511944	1.97736	0.00205341	0.0279965	0.022722	140	tags=69%, list=30%, signal=51%	CTSG, PLSCR1, TIMP1, FN1, TPM1, TGFB1, CD36, GP1BB, IL6ST, SERPINE1, ITGAV, F12, ITGA5, VWF, PDGFA, F11R, KLKB1, HRG	CD36, CTSG, F12, FN1, B4GALT1, GP1BB, HRG, IL6ST, ITGA2, ITGA5, ITGAV, KLKB1, SERPINE1, PDGFA, PLSCR1, PPIA, PROS1, ADAM17, TGFB1, TIMP1, TPM1, VWF, CHMP2A, F11R, CD109, ANO6
Cluster 3	1h post exercise	BP	GO:0002250	adaptive immune response	26	-0.634478	-2.34378	2.60345e-06	0.000527701	0.000471442	36	tags=50%, list=11%, signal=48%	HLA-E, CX3CR1, PHB1, HLA-F, TRGC1, TBX21, CD247, ZAP70, FCGR3A, STAT4, GZMM, SH2D1B, PRF1	CD247, CTSC, CX3CR1, FCGR3A, GNL1, GZMM, HLA-E, HLA-F, HSPD1, INPP5D, SH2D1A, PHB1, PRF1, PKN1, STAT4, TAP2, TRGC1, ZAP70, RFTN1, PRKD2, LAT, TBX21, CYRIB, MYO1G, SH2D1B, IL4I1
Cluster 3	1h post exercise	BP	GO:0002460	adaptive immune response based on somatic recombination of immune receptors built from immunoglobulin superfamily domains	18	-0.596415	-2.02869	0.000443017	0.0152616	0.0136345	36	tags=44%, list=11%, signal=42%	HLA-E, PHB1, HLA-F, TBX21, FCGR3A, STAT4, GZMM, PRF1	CTSC, FCGR3A, GNL1, GZMM, HLA-E, HLA-F, HSPD1, INPP5D, PHB1, PRF1, PKN1, STAT4, TAP2, RFTN1, TBX21, CYRIB, MYO1G, IL4I1
Cluster 3	1h post exercise	BP	GO:0141060	disruption of anatomical structure in another organism	10	-0.689956	-1.99118	0.0008628	0.0180596	0.0161342	15	tags=50%, list=5%, signal=49%	GZMA, GZMM, GZMH, GZMB, PRF1	GAPDH, GBP1, GBP2, GBP3, GZMH, GZMA, GZMB, GZMM, PRF1, GBP5
Cluster 3	1h post exercise	BP	GO:0141061	disruption of cell in another organism	10	-0.689956	-1.99118	0.0008628	0.0180596	0.0161342	15	tags=50%, list=5%, signal=49%	GZMA, GZMM, GZMH, GZMB, PRF1	GAPDH, GBP1, GBP2, GBP3, GZMH, GZMA, GZMB, GZMM, PRF1, GBP5
Cluster 3	1h post exercise	BP	GO:0031640	killing of cells of another organism	10	-0.689956	-1.99118	0.0008628	0.0180596	0.0161342	15	tags=50%, list=5%, signal=49%	GZMA, GZMM, GZMH, GZMB, PRF1	GAPDH, GBP1, GBP2, GBP3, GZMH, GZMA, GZMB, GZMM, PRF1, GBP5
Cluster 3	1h post exercise	BP	GO:0001909	leukocyte mediated cytotoxicity	12	-0.779734	-2.37105	2.70616e-06	0.000527701	0.000471442	36	tags=67%, list=11%, signal=62%	HLA-E, CX3CR1, HLA-F, FCGR3A, GZMM, GZMB, PRF1, STAP1	CTSC, CX3CR1, FCGR3A, GZMB, GZMM, HLA-E, HLA-F, SH2D1A, PRF1, TAP2, STAP1, CYRIB
Cluster 3	1h post exercise	BP	GO:0002443	leukocyte mediated immunity	22	-0.606046	-2.16184	7.84373e-05	0.00437008	0.00390417	84	tags=64%, list=25%, signal=51%	IL4I1, HSPD1, SH2D1A, RAC2, HLA-E, CX3CR1, HLA-F, TBX21, FCGR3A, GZMM, SH2D1B, GZMB, PRF1, STAP1	CTSC, CX3CR1, FCGR3A, GNL1, GZMB, GZMM, HLA-E, HLA-F, HSPD1, INPP5D, SH2D1A, PRF1, RAC2, TAP2, RFTN1, STAP1, LAT, TBX21, CYRIB, MYO1G, SH2D1B, IL4I1
Cluster 3	1h post exercise	BP	GO:0046649	lymphocyte activation	30	-0.602727	-2.28732	5.11982e-06	0.000798691	0.000713541	60	tags=57%, list=18%, signal=51%	RAC2, RASAL3, NLRC3, TBC1D10C, HLA-E, PHB1, LCK, HLA-F, RUNX1, TRGC1, TBX21, CD247, ZAP70, FCGR3A, STAT4, RUNX3, PRF1	ATM, CASP8, RUNX2, RUNX1, RUNX3, CD247, FCGR3A, HLA-E, HLA-F, HSPD1, INPP5D, LCK, NFATC2, PHB1, PRF1, PKN1, RAC2, SMARCC2, STAT4, TRGC1, ZAP70, RAB29, LAT, TBX21, CYRIB, RASAL3, RASSF5, NLRC3, IL4I1, TBC1D10C
Cluster 3	1h post exercise	BP	GO:0030098	lymphocyte differentiation	11	-0.66821	-1.9832	0.000730524	0.0173006	0.0154561	31	tags=55%, list=9%, signal=51%	LCK, RUNX1, TBX21, ZAP70, STAT4, RUNX3	ATM, RUNX2, RUNX1, RUNX3, INPP5D, LCK, SMARCC2, STAT4, ZAP70, TBX21, IL4I1
Cluster 3	1h post exercise	BP	GO:0002449	lymphocyte mediated immunity	18	-0.59095	-2.0101	0.000512364	0.0159857	0.0142815	36	tags=61%, list=11%, signal=58%	IL4I1, HSPD1, SH2D1A, HLA-E, HLA-F, TBX21, FCGR3A, GZMM, SH2D1B, GZMB, PRF1	CTSC, FCGR3A, GNL1, GZMB, GZMM, HLA-E, HLA-F, HSPD1, INPP5D, SH2D1A, PRF1, TAP2, RFTN1, TBX21, CYRIB, MYO1G, SH2D1B, IL4I1
Cluster 3	Post exercise	CC	GO:0005764	lysosome	21	0.732039	1.91608	0.000123567	0.0433276	0.0412811	30	tags=43%, list=9%, signal=42%	GZMH, GZMB, PRF1, CST7, WDR24, IDS, HLA-F, IL4I1, PLEKHF1	CAPN2, CTSC, GZMH, GZMB, HLA-F, IDS, PRF1, SMPD1, CST7, RAB9A, CCT8, RMC1, DPP7, SLC35F6, RDH14, PLEKHF1, LPCAT1, TRAF3IP3, WDR24, AP5B1, IL4I1
Cluster 3	1h post exercise	CC	GO:0005764	lysosome	21	-0.550094	-1.94153	0.0015029	0.0272619	0.0243555	84	tags=52%, list=25%, signal=42%	IL4I1, SMPD1, SLC35F6, CST7, HLA-F, IDS, LPCAT1, PLEKHF1, GZMH, GZMB, PRF1	CAPN2, CTSC, GZMH, GZMB, HLA-F, IDS, PRF1, SMPD1, CST7, RAB9A, CCT8, RMC1, DPP7, SLC35F6, RDH14, PLEKHF1, LPCAT1, TRAF3IP3, WDR24, AP5B1, IL4I1
Cluster 3	Post exercise	CC	GO:0000323	lytic vacuole	21	0.732039	1.91608	0.000123567	0.0433276	0.0412811	30	tags=43%, list=9%, signal=42%	GZMH, GZMB, PRF1, CST7, WDR24, IDS, HLA-F, IL4I1, PLEKHF1	CAPN2, CTSC, GZMH, GZMB, HLA-F, IDS, PRF1, SMPD1, CST7, RAB9A, CCT8, RMC1, DPP7, SLC35F6, RDH14, PLEKHF1, LPCAT1, TRAF3IP3, WDR24, AP5B1, IL4I1
Cluster 3	1h post exercise	CC	GO:0000323	lytic vacuole	21	-0.550094	-1.94153	0.0015029	0.0272619	0.0243555	84	tags=52%, list=25%, signal=42%	IL4I1, SMPD1, SLC35F6, CST7, HLA-F, IDS, LPCAT1, PLEKHF1, GZMH, GZMB, PRF1	CAPN2, CTSC, GZMH, GZMB, HLA-F, IDS, PRF1, SMPD1, CST7, RAB9A, CCT8, RMC1, DPP7, SLC35F6, RDH14, PLEKHF1, LPCAT1, TRAF3IP3, WDR24, AP5B1, IL4I1
Cluster 3	1h post exercise	CC	GO:0098796	membrane protein complex	26	-0.587082	-2.1687	4.3656e-05	0.00309561	0.00276558	60	tags=50%, list=18%, signal=44%	RAC2, ATP5F1B, ITGB7, HLA-E, PHB1, HLA-F, TRGC1, CD247, ZAP70, FCGR3A, NCALD, CLIC3, COX6A1	ATP5F1A, ATP5F1B, CASP8, CD247, COPB1, COX6A1, FCGR3A, HLA-E, HLA-F, HSPD1, ITGB7, PHB1, RAC2, TAP2, TRGC1, UQCRC2, ZAP70, TRADD, CLIC3, SEC22B, AFG3L2, SYNE2, AGK, NCALD, SEC11C, AP5B1
Cluster 3	1h post exercise	BP	GO:1903131	mononuclear cell differentiation	11	-0.66821	-1.9832	0.000730524	0.0173006	0.0154561	31	tags=55%, list=9%, signal=51%	LCK, RUNX1, TBX21, ZAP70, STAT4, RUNX3	ATM, RUNX2, RUNX1, RUNX3, INPP5D, LCK, SMARCC2, STAT4, ZAP70, TBX21, IL4I1
Cluster 3	1h post exercise	CC	GO:0098797	plasma membrane protein complex	10	-0.76634	-2.21162	3.42513e-05	0.00296844	0.00265197	60	tags=80%, list=18%, signal=68%	RAC2, ITGB7, HLA-E, HLA-F, TRGC1, CD247, ZAP70, FCGR3A	CASP8, CD247, FCGR3A, HLA-E, HLA-F, ITGB7, RAC2, TRGC1, ZAP70, TRADD
Cluster 3	1h post exercise	BP	GO:0022409	positive regulation of cell-cell adhesion	11	-0.648082	-1.92346	0.0020957	0.0347798	0.0310718	84	tags=73%, list=25%, signal=56%	IL4I1, HSPD1, RASAL3, HLA-E, LCK, RUNX1, ZAP70, RUNX3	RUNX1, RUNX3, HLA-E, HSPD1, LCK, SMARCC2, ZAP70, CHST2, CYRIB, RASAL3, IL4I1
Cluster 3	1h post exercise	BP	GO:1903039	positive regulation of leukocyte cell-cell adhesion	11	-0.648082	-1.92346	0.0020957	0.0347798	0.0310718	84	tags=73%, list=25%, signal=56%	IL4I1, HSPD1, RASAL3, HLA-E, LCK, RUNX1, ZAP70, RUNX3	RUNX1, RUNX3, HLA-E, HSPD1, LCK, SMARCC2, ZAP70, CHST2, CYRIB, RASAL3, IL4I1
Cluster 3	1h post exercise	BP	GO:0050870	positive regulation of T cell activation	10	-0.677115	-1.95412	0.0013415	0.0255211	0.0228003	84	tags=80%, list=25%, signal=62%	IL4I1, HSPD1, RASAL3, HLA-E, LCK, RUNX1, ZAP70, RUNX3	RUNX1, RUNX3, HLA-E, HSPD1, LCK, SMARCC2, ZAP70, CYRIB, RASAL3, IL4I1
Cluster 3	1h post exercise	BP	GO:0042127	regulation of cell population proliferation	35	-0.46161	-1.80316	0.00317525	0.0485627	0.0433853	115	tags=63%, list=35%, signal=46%	CTBP1, RASSF5, RPRD1B, STAT1, TXNIP, MECP2, IL4I1, TES, HCLS1, RAC2, SLC35F6, RASAL3, NLRC3, HLA-E, CX3CR1, AKR1C3, PHB1, RUNX1, ZAP70, FCGR3A, STAT4, RUNX3	ATM, ATP5F1A, RUNX2, RUNX1, RUNX3, CTBP1, CX3CR1, FCGR3A, HCLS1, HLA-E, INPP5D, MECP2, NFATC2, PHB1, PML, PRKCH, PKN1, RAC2, STAT1, STAT4, ZAP70, AKR1C3, NAMPT, RBM5, TXNIP, UFL1, PRKD2, SYF2, TES, SLC35F6, RPRD1B, RASAL3, RASSF5, NLRC3, IL4I1
Cluster 3	1h post exercise	BP	GO:0022407	regulation of cell-cell adhesion	12	-0.663109	-2.01641	0.000636464	0.0173006	0.0154561	84	tags=75%, list=25%, signal=58%	IL4I1, HSPD1, RASAL3, HLA-E, LCK, RUNX1, TBX21, ZAP70, RUNX3	RUNX1, RUNX3, HLA-E, HSPD1, LCK, SMARCC2, ZAP70, CHST2, TBX21, CYRIB, RASAL3, IL4I1
Cluster 3	1h post exercise	BP	GO:1903037	regulation of leukocyte cell-cell adhesion	12	-0.663109	-2.01641	0.000636464	0.0173006	0.0154561	84	tags=75%, list=25%, signal=58%	IL4I1, HSPD1, RASAL3, HLA-E, LCK, RUNX1, TBX21, ZAP70, RUNX3	RUNX1, RUNX3, HLA-E, HSPD1, LCK, SMARCC2, ZAP70, CHST2, TBX21, CYRIB, RASAL3, IL4I1
Cluster 3	1h post exercise	BP	GO:0002703	regulation of leukocyte mediated immunity	12	-0.713049	-2.16827	8.74608e-05	0.00454796	0.00406309	84	tags=83%, list=25%, signal=65%	IL4I1, HSPD1, SH2D1A, RAC2, HLA-E, CX3CR1, HLA-F, TBX21, SH2D1B, STAP1	CX3CR1, HLA-E, HLA-F, HSPD1, SH2D1A, RAC2, TAP2, STAP1, TBX21, CYRIB, SH2D1B, IL4I1
Cluster 3	1h post exercise	BP	GO:0050863	regulation of T cell activation	13	-0.651295	-2.02637	0.000754128	0.0173006	0.0154561	101	tags=85%, list=30%, signal=61%	LAT, IL4I1, HSPD1, RAC2, RASAL3, HLA-E, LCK, RUNX1, TBX21, ZAP70, RUNX3	RUNX1, RUNX3, HLA-E, HSPD1, LCK, RAC2, SMARCC2, ZAP70, LAT, TBX21, CYRIB, RASAL3, IL4I1
Cluster 3	1h post exercise	BP	GO:0042110	T cell activation	20	-0.613747	-2.14303	0.00022247	0.0102074	0.00911921	84	tags=70%, list=25%, signal=56%	IL4I1, HSPD1, RAC2, RASAL3, NLRC3, HLA-E, LCK, RUNX1, TRGC1, TBX21, CD247, ZAP70, STAT4, RUNX3	CASP8, RUNX2, RUNX1, RUNX3, CD247, HLA-E, HSPD1, LCK, RAC2, SMARCC2, STAT4, TRGC1, ZAP70, RAB29, LAT, TBX21, CYRIB, RASAL3, NLRC3, IL4I1
Cluster 3	Post exercise	CC	GO:0005773	vacuole	22	0.725905	1.90566	0.000166645	0.0433276	0.0412811	30	tags=41%, list=9%, signal=40%	GZMH, GZMB, PRF1, CST7, WDR24, IDS, HLA-F, IL4I1, PLEKHF1	CAPN2, CTSC, GZMH, GZMB, HLA-F, IDS, PRF1, SMPD1, CST7, RAB29, RAB9A, CCT8, RMC1, DPP7, SLC35F6, RDH14, PLEKHF1, LPCAT1, TRAF3IP3, WDR24, AP5B1, IL4I1
Cluster 3	1h post exercise	CC	GO:0005773	vacuole	22	-0.52554	-1.87466	0.00265365	0.0431217	0.0385244	69	tags=50%, list=21%, signal=42%	IL4I1, SMPD1, SLC35F6, CST7, HLA-F, IDS, LPCAT1, PLEKHF1, GZMH, GZMB, PRF1	CAPN2, CTSC, GZMH, GZMB, HLA-F, IDS, PRF1, SMPD1, CST7, RAB29, RAB9A, CCT8, RMC1, DPP7, SLC35F6, RDH14, PLEKHF1, LPCAT1, TRAF3IP3, WDR24, AP5B1, IL4I1
