# Supplementary material for: Acute exercise rewires the proteomic landscape of human immune cells
Source: Research Square preprint supplement (doi:10.21203/rs.3.rs-6864249/v1), 2025-06-30
Supplement: Supplementary file 10 [file f3b9bd73f478fb6649eec5cc.xlsx]

## Sheet: Spearman correlation
Protein	VO2peak
PGD	0.718182
SDF2L1	0.701299
C11orf54	0.628571
NT5C	0.607792
ABHD4	0.603896
USP15	0.603896
TAX1BP3	0.601299
TPI1	0.593506
GRB2	0.588312
PRKG1	0.584416
OGFRL1	0.576623
CARD9	0.574026
UFD1	0.567532
PRDX1	0.561039
PITPNB	0.549351
OPLAH	0.545455
GPI	0.544156
NUDC	0.542857
NCOA7	0.537662
ATP6V1D	0.536364
MMP9	0.532468
PFDN2	0.532468
LAP3	0.528571
NME1	0.523377
TRAFD1	0.522078
ACOX3	0.522078
PFKM	0.519481
ENO1	0.518182
PLCB2	0.515584
VAV1	0.514286
WDFY2	0.512987
GOT1	0.511688
AGFG1	0.509091
GMPPA	0.506494
SUCNR1	0.506494
BLVRA	0.505195
TSNAX	0.505195
TXNL4B	0.497403
ALDOA	0.496104
STRAP	0.490909
BLMH	0.487013
FAM3C	0.487013
ASRGL1	0.485714
DNAJC7	0.485714
APBA2	0.484416
FSTL1	0.481818
CAMP	0.479221
OLA1	0.479221
NIN	0.477922
CPOX	0.476623
ACOT7	0.474026
UAP1L1	0.472727
MLKL	0.472727
ARAP1	0.472727
HTATIP2	0.472727
TPT1	0.467532
FAM3A	0.467532
QARS1	0.466234
DPYD	0.466234
SLA	0.464935
VIL1	0.464935
NAT1	0.464935
MGAT5	0.464935
EIF4E	0.463636
GSPT1	0.462338
ARFGAP2	0.462338
PPP5C	0.45974
ACSL1	0.45974
MAPKAPK3	0.458442
ZSWIM8	0.457143
ALDH1A1	0.457143
FKBP3	0.457143
MDP1	0.457143
GBA1	0.455844
CETP	0.455844
PIK3CG	0.455844
CZIB	0.455844
CASP3	0.454545
C3P1	0.454545
PDIA4	0.453247
ITSN2	0.448052
ACSL4	0.448052
HDLBP	0.446753
RPH3AL	0.446753
SLC25A17	0.446753
PAFAH1B2	0.446753
MLC1	0.446753
B3GNT2	0.446753
UBE2L3	0.445455
AKR7A2	0.441558
LDLRAP1	0.441558
GSTZ1	0.44026
LYST	0.44026
PCMT1	0.438961
PHPT1	0.438961
LGALS3	0.437662
UBE2V1	0.436364
MAPK14	0.436364
OSBPL6	0.436364
CSTA	0.433766
SEPSECS	0.432468
USP14	0.432468
ADPRH	0.432468
CPEB2	0.431169
ENO3	0.428571
SHOC2	0.428571
IGLL5	0.427273
EEA1	0.427273
SAR1B	0.427273
FAH	0.425974
STAMBP	0.424675
TRIO	0.424675
VCP	0.423377
ACSBG1	0.423377
ARPC5	0.423377
FASN	0.423377
GBE1	0.423377
DYRK1A	0.422078
SMAP1	0.422078
PAAF1	0.422078
ACSS2	0.422078
PRMT5	0.420779
HINT3	0.420779
RIN3	0.419481
TACC2	0.419481
GLCE	0.419481
NME1-NME2	0.418182
PACSIN2	0.418182
DERA	0.418182
CBL	0.415584
LTF	0.415584
NRDC	0.415584
TPMT	0.415584
PPCS	0.415584
EEF1G	0.414286
MEAK7	0.412987
ASNS	0.411688
IGBP1	0.41039
PLEKHO2	0.409091
GGA1	0.409091
LRRC59	0.406494
DUSP22	0.406494
UGGT1	0.406494
PGK1	0.405195
PAICS	0.405195
DCUN1D1	0.405195
NAA15	0.405195
NAMPT	0.403896
PLOD1	0.403896
HAGH	0.401299
RAB3GAP2	0.401299
GOSR2	0.4
HPRT1	0.4
FDPS	0.4
FBXO30	0.4
NGLY1	0.4
PANX1	0.4
PPID	0.398701
MOB1B	0.398701
SLA2	0.398701
PRKCSH	0.397403
GGCT	0.397403
EIF2A	0.397403
PPIB	0.396104
LCN2	0.396104
DIPK2A	0.396104
NDOR1	0.396104
CHMP1A	0.394805
LANCL2	0.394805
NUDT1	0.393506
AGPAT3	0.393506
RBM47	0.392208
SUMF2	0.392208
CAPG	0.392208
HSP90AA1	0.390909
DAB2	0.390909
MTMR6	0.390909
ZNF185	0.38961
UBE2M	0.38961
SMC2	0.388312
CASP4	0.388312
NKIRAS2	0.388312
ATP6V1E1	0.387013
MAN2A1	0.387013
PTP4A2	0.385714
ARF1	0.384416
RSU1	0.384416
AMPD2	0.383117
AIG1	0.383117
ST7	0.381818
PNP	0.380519
RAB7A	0.380519
FABP5	0.380519
SAR1A	0.380519
APPL1	0.380519
SCRN3	0.379221
ATG7	0.377922
COPA	0.377922
TWF2	0.377922
DTYMK	0.376623
GNPNAT1	0.376623
MAP4K4	0.375325
SRA1	0.375325
FAF1	0.375325
SLC18A2	0.374026
TBC1D15	0.374026
MAN2C1	0.374026
GGA3	0.374026
CEP131	0.374026
SNX3	0.372727
FCGR2A	0.372727
ATIC	0.372727
GNG5	0.372727
NIT1	0.372727
RASGRP4	0.37013
GSTO1	0.37013
GRIPAP1	0.37013
ACYP1	0.368831
PKM	0.368831
SCARF1	0.368831
ATOX1	0.367532
OSBPL3	0.367532
DDT	0.366234
GALE	0.366234
MSRA	0.366234
TNIP1	0.364935
ENSA	0.364935
DYSF	0.364935
APLP2	0.364935
WDFY1	0.364935
CAMKK2	0.364935
GPCPD1	0.364935
NMRK1	0.364935
PSMD3	0.363636
EPHX2	0.363636
ISYNA1	0.362338
ADH5	0.361039
PDGFD	0.361039
PFDN6	0.35974
TARS1	0.35974
CDV3	0.35974
SRPRB	0.35974
TXNDC5	0.358442
VBP1	0.357143
TBCE	0.355844
LRRK2	0.355844
NT5C2	0.354545
GPR107	0.354545
OSBP2	0.354545
HSPA8	0.354545
ALAD	0.354545
PREP	0.354545
COPS3	0.354545
GSS	0.353247
ELP2	0.353247
ARID3A	0.353247
GMPR2	0.351948
SCP2	0.351948
MEMO1	0.351948
KSR1	0.350649
SETD3	0.350649
NUDT16	0.350649
THG1L	0.350649
POGLUT2	0.349351
TRIM58	0.349351
CAB39	0.349351
PSMD10	0.348052
PICALM	0.348052
CLEC11A	0.348052
STIP1	0.346753
HSD17B4	0.346753
CA13	0.346753
FAM20B	0.345455
CAPZB	0.345455
IST1	0.345455
PITPNA	0.345455
CHST12	0.345455
TACC3	0.344156
RABAC1	0.344156
HPX	0.344156
PEPD	0.344156
CDC37	0.344156
ZFAND1	0.342857
DNAJA2	0.341558
PPIA	0.341558
MESD	0.341558
SLC35D2	0.341558
ZFYVE16	0.341558
SMAP2	0.341558
RBP7	0.341558
PPP1R9B	0.341558
FPR1	0.34026
NDST1	0.34026
ENOSF1	0.34026
CHID1	0.34026
CREG1	0.338961
RPIA	0.338961
RAB18	0.338961
PAPSS1	0.337662
FADD	0.337662
NAP1L4	0.337662
BAG6	0.336364
LACTB2	0.336364
TREML2	0.336364
SLC35B2	0.336364
L3HYPDH	0.336364
GAS7	0.335065
APOE	0.335065
PPBP	0.335065
ACYP2	0.335065
MAPK3	0.335065
HPCAL1	0.335065
MTAP	0.335065
RTN1	0.335065
TP53I3	0.335065
PDLIM5	0.335065
AP1S2	0.333766
OSTF1	0.333766
ERLIN1	0.332468
PFN1	0.332468
AAGAB	0.332468
PACSIN1	0.332468
C1GALT1	0.332468
HIF1AN	0.332468
PLXNB2	0.331169
CAPZA1	0.331169
PIK3R6	0.331169
AP1G2	0.32987
RAD23A	0.32987
STRN3	0.32987
GSPT2	0.32987
ATG3	0.32987
FBXO7	0.32987
PRXL2B	0.328571
DPY19L1	0.328571
TBC1D9B	0.328571
TMED4	0.328571
ARSA	0.327273
PLCG2	0.327273
BLOC1S1	0.327273
ACAP2	0.327273
DCAKD	0.327273
PTPA	0.325974
NANS	0.325974
GMIP	0.325974
SNX24	0.324675
SH3BGRL	0.324675
DNAJA1	0.324675
GDI2	0.324675
RPP38	0.324675
LANCL3	0.324675
IKBKG	0.323377
LDHA	0.323377
ARL3	0.323377
STT3B	0.323377
IFT27	0.323377
SEC16A	0.322078
TECPR2	0.322078
AHCYL1	0.322078
BICD2	0.322078
RAB3GAP1	0.320779
PHYKPL	0.320779
Height	0.320314
PRSS57	0.319481
LILRA3	0.319481
PPM1F	0.319481
HSD17B11	0.319481
NCK1	0.318182
CRKL	0.318182
TGFB2	0.318182
KYNU	0.318182
KCTD10	0.316883
SURF4	0.316883
COTL1	0.316883
STON2	0.315584
NUDT5	0.315584
RTN3	0.315584
CAT	0.315584
ARFIP1	0.315584
CAP1	0.315584
SNX5	0.315584
ACSL3	0.314286
VWA5A	0.314286
KBTBD11	0.314286
LSS	0.314286
PRKAG1	0.314286
EVI5L	0.314286
UFM1	0.312987
RAB6C	0.312987
OCIAD1	0.312987
OSCAR	0.311688
TNIP2	0.311688
AKT2	0.311688
P2RY1	0.311688
DHODH	0.311688
TNS1	0.31039
FNTB	0.31039
FBXO22	0.31039
UBE2Z	0.31039
ARMCX3	0.31039
YKT6	0.309091
PRKCD	0.309091
CMBL	0.309091
WDR87	0.307792
UBE4B	0.307792
UBE2K	0.307792
PSMB7	0.307792
LTA4H	0.306494
ARF5	0.306494
PAFAH1B3	0.306494
PSMB6	0.305195
FOCAD	0.305195
ACAT2	0.305195
ARMT1	0.305195
ARIH2	0.303896
GOLGA3	0.303896
PAM	0.302597
PCBD2	0.302597
NFAT5	0.302597
TXNL1	0.302597
ARAF	0.302597
PSTPIP2	0.302597
ABCB6	0.302597
PSMD12	0.301299
VAPB	0.301299
CLTA	0.301299
IFI30	0.301299
PIK3R1	0.301299
GMPR	0.301299
PTPN18	0.301299
SEC14L5	0.3
GSR	0.3
FER	0.3
HEBP2	0.3
NEK9	0.298701
CPT2	0.298701
CDKN1A	0.298701
RABIF	0.298701
MPP1	0.298701
NARS1	0.297403
DNAJB6	0.297403
CBR1	0.297403
RAB2B	0.297403
NAIP	0.296104
LDAH	0.296104
GEMIN4	0.296104
GOLGB1	0.296104
ZYX	0.296104
CYB5R4	0.296104
ATG9A	0.296104
MOSPD2	0.296104
RAB3C	0.296104
C1GALT1C1	0.296104
PANK2	0.296104
SNX12	0.294805
PGRMC1	0.294805
MAP1B	0.294805
STK3	0.294805
HAUS4	0.293506
AP2S1	0.293506
AP1B1	0.293506
CCDC88C	0.293506
CHST2	0.293506
MAP1LC3B	0.292208
MYO1C	0.292208
SOD1	0.292208
PLXDC2	0.292208
XPO6	0.292208
AP4M1	0.290909
SRGN	0.290909
TAGLN2	0.290909
NUTF2	0.290909
RAB1A	0.290909
IGKC	0.28961
CSK	0.28961
HGD	0.28961
VTA1	0.288312
WIPF1	0.288312
GRK2	0.288312
METAP1	0.288312
CYP2S1	0.288312
RAB1B	0.288312
GMPPB	0.288312
PTPN11	0.287013
ECM1	0.287013
RABL6	0.287013
KCTD9	0.287013
GART	0.285714
FKBP1A	0.285714
WDR13	0.285714
TGFB1	0.284416
IGLV1-47	0.284416
SERPINE1	0.284416
AFTPH	0.284416
MTMR14	0.284416
FKBP2	0.283117
GSTM2	0.283117
GLRX	0.283117
GALNT7	0.283117
PFAS	0.281818
TWF1	0.281818
MTM1	0.281818
IAH1	0.281818
PPM1L	0.281818
APTX	0.281818
HAUS8	0.281818
GRHPR	0.281818
EML3	0.280519
STEAP4	0.280519
TIPRL	0.280519
AK1	0.280519
APP	0.280519
ADRA2A	0.280519
ATP6V0C	0.280519
GABARAPL2	0.280519
CYBRD1	0.280519
PPP1R21	0.280519
STX12	0.280519
ERC1	0.279221
IDH1	0.279221
NUDT3	0.279221
ATP2A2	0.279221
STMN1	0.279221
UBE2N	0.279221
GALNT1	0.279221
DTNBP1	0.279221
ATG5	0.279221
ZMYND8	0.277922
SHPK	0.277922
NEMF	0.277922
SH3BGRL3	0.277922
ACSL5	0.277922
C9orf72	0.276623
DIAPH2	0.276623
GOLIM4	0.276623
MAP3K6	0.276623
RANBP1	0.276623
EHHADH	0.276623
TMEM199	0.276623
PCYOX1L	0.276623
ZNF668	0.276623
TM9SF3	0.276623
PARL	0.275325
ATP6	0.275325
STOM	0.275325
PEBP1	0.275325
FNBP1L	0.275325
SESTD1	0.275325
PACC1	0.275325
ST3GAL6	0.274026
AARS1	0.274026
HBS1L	0.274026
AK2	0.274026
YES1	0.274026
CYBB	0.274026
SYK	0.274026
PUDP	0.274026
LCP2	0.274026
KTN1	0.274026
CORO1B	0.274026
SNX6	0.272727
MICU1	0.272727
TNK2	0.272727
LGALS9	0.272727
IGLC2	0.272727
DUSP3	0.272727
C11orf68	0.272727
RABGEF1	0.271429
QSOX1	0.271429
ACLY	0.271429
WIPI1	0.271429
BIN2	0.271429
NMT1	0.27013
RFT1	0.27013
ACACA	0.27013
FSCN1	0.27013
CEP170	0.27013
COLGALT1	0.27013
TMEM9B	0.27013
SYNRG	0.27013
AP1M2	0.27013
IGHG4	0.268831
STAT5A	0.268831
CIAPIN1	0.268831
MINK1	0.268831
CTPS1	0.267532
GSTM5	0.267532
COG8	0.267532
ACOT8	0.267532
ARCN1	0.267532
IRAK3	0.267532
CD4_prop	0.267532
HGS	0.266234
GARS1	0.266234
TANGO2	0.266234
HS2ST1	0.266234
MTMR9	0.266234
LILRB1	0.264935
NDUFB10	0.264935
ITGA2	0.264935
TBC1D10B	0.264935
MICU2	0.264935
OSBPL9	0.264935
HARS1	0.263636
TSG101	0.263636
GOLGA4	0.263636
INPPL1	0.263636
GSTP1	0.263636
PIK3CB	0.263636
RENBP	0.263636
EIF5	0.263636
CIRBP	0.263636
RILP	0.263636
POFUT1	0.263636
NME7	0.263636
SLIT1	0.262338
GLA	0.262338
PRDX4	0.262338
OLFML2A	0.262338
PPP1R14B	0.262338
DNAJB11	0.262338
HCK	0.261039
PLOD3	0.261039
IDI1	0.261039
WDR77	0.261039
CPVL	0.261039
ARL8B	0.261039
ZNFX1	0.261039
PLXNA1	0.261039
DHCR24	0.25974
ELP1	0.25974
UBL4A	0.25974
THOP1	0.25974
CHIT1	0.25974
SQSTM1	0.25974
EMC2	0.25974
FERMT3	0.25974
SEC31A	0.258442
FBP1	0.258442
COX5B	0.258442
GGH	0.258442
KCTD12	0.258442
CD93	0.258442
FCER1G	0.257143
PLCB3	0.257143
SPIRE1	0.257143
ITSN1	0.257143
TKFC	0.257143
GXYLT1	0.257143
IKBIP	0.257143
TAOK3	0.257143
AAMDC	0.257143
CACYBP	0.257143
MRPL52	0.255844
STK38	0.255844
NT5M	0.255844
RABGGTA	0.255844
CD302	0.254545
TNFSF13	0.254545
SPG11	0.254545
APOB	0.254545
TALDO1	0.254545
IGHE	0.253247
ARHGEF7	0.253247
PAFAH1B1	0.253247
SMC4	0.253247
DENND3	0.253247
FPR2	0.253247
ANKRD22	0.253247
DOLPP1	0.253247
RIT1	0.253247
BPIFA2	0.253247
TBCB	0.253247
AP1M1	0.253247
BORCS7	0.251948
AIMP1	0.251948
SND1	0.251948
PSMG2	0.251948
SDSL	0.251948
PLGRKT	0.251948
MCTS1	0.251948
isFemale	0.251935
CASP9	0.250649
KRAS	0.250649
IGKV3-20	0.250649
SERPIND1	0.250649
PGAM1	0.250649
SARS1	0.250649
DNAJC3	0.250649
PMVK	0.250649
TOLLIP	0.250649
CIAO3	0.250649
MYG1	0.250649
ARHGAP35	0.250649
SACM1L	0.249351
PTPRF	0.249351
RAB6A	0.249351
RAB38	0.249351
WDFY3	0.249351
DHRS1	0.249351
VPS13A	0.249351
BPNT2	0.249351
SCAMP1	0.248052
MKNK1	0.248052
HYI	0.248052
GMDS	0.248052
CDC42	0.248052
UBR2	0.248052
GTF3C2	0.248052
TLR8	0.248052
Treg_prop	0.247563
ESYT2	0.246753
SERPINB2	0.246753
ME2	0.246753
CPT1A	0.246753
BROX	0.246753
PLBD1	0.246753
SDF2	0.246753
PIGB	0.245455
STK11	0.245455
VPS26A	0.245455
PTPN1	0.245455
AMPD3	0.245455
MAPRE1	0.245455
CCDC6	0.245455
THEM4	0.245455
PFKFB3	0.244156
PXMP4	0.244156
DENR	0.244156
GRAP2	0.244156
PRKCB	0.244156
MARCKS	0.244156
GPR183	0.244156
HAAO	0.244156
PIN1	0.244156
GCC1	0.244156
COG3	0.244156
TMEM30A	0.244156
PNPO	0.244156
UBQLN2	0.244156
CCDC88A	0.242857
RAB33B	0.242857
ARRB1	0.242857
MAGED2	0.242857
METTL9	0.242857
SMARCAL1	0.242857
PLD4	0.241558
PGM3	0.241558
SYNGR1	0.241558
LYSMD3	0.241558
LRRC75A	0.241558
GGACT	0.241558
CPNE8	0.24026
CMPK1	0.24026
PTDSS2	0.24026
DIP2B	0.24026
FPGT	0.238961
RNASEH2B	0.238961
IMPA2	0.238961
RNASE3	0.238961
ARHGAP1	0.238961
NID2	0.238961
LYPLAL1	0.238961
ERP44	0.238961
RAP1GAP2	0.237662
TRAPPC2	0.237662
SPI1	0.237662
SPR	0.237662
TXNRD1	0.236364
PIP5K1A	0.236364
PAPSS2	0.236364
ROCK1	0.236364
PREPL	0.236364
UBE2Q1	0.236364
CNPY3	0.236364
GAN	0.236364
SLC3A2	0.235065
G6PD	0.235065
B4GALT1	0.235065
BID	0.235065
MGAM2	0.235065
SEC24A	0.233766
NDUFAF5	0.233766
NAPRT	0.233766
PPIL1	0.233766
TM9SF4	0.232468
CTSG	0.232468
RABEP1	0.232468
VPS37A	0.232468
DHX29	0.231169
NQO2	0.231169
LBP	0.231169
RDX	0.231169
MAP2K3	0.231169
CKAP4	0.231169
MPEG1	0.231169
TAGLN3	0.231169
WDR45	0.22987
CERT1	0.22987
TFRC	0.22987
HRG	0.22987
PRTN3	0.22987
HK3	0.22987
RAB44	0.22987
NRGN	0.22987
CAPN7	0.22987
CLEC2L	0.228571
UQCRB	0.228571
RAB4A	0.228571
PPIF	0.228571
PIP4K2A	0.228571
PLTP	0.228571
IRF3	0.228571
DPH5	0.228571
C1orf198	0.228571
HK2	0.227273
HLA-DOB	0.227273
EMD	0.227273
TRIP13	0.227273
NHLRC2	0.227273
NIPSNAP3A	0.227273
PYCARD	0.227273
ARL5A	0.227273
CNRIP1	0.225974
COPE	0.225974
SERPINB8	0.225974
METAP2	0.225974
RPS21	0.225974
SMYD3	0.225974
ABAT	0.224675
PLPBP	0.224675
PAK2	0.224675
PDIA6	0.224675
ADCK5	0.224675
HACD4	0.224675
ZDHHC21	0.224675
FAR1	0.224675
TP53RK	0.224675
SIDT1	0.224675
MOCS2	0.223377
MMP8	0.223377
VPS25	0.223377
NAGK	0.223377
ATXN2	0.222078
PPP1R2	0.222078
VASP	0.222078
IFIT5	0.222078
NCAPD2	0.222078
TSPAN33	0.222078
ACOT2	0.220779
C9	0.220779
AKR1A1	0.220779
ARHGDIB	0.220779
SLC25A35	0.220779
TRAPPC12	0.220779
ATG4B	0.220779
ANO6	0.219481
AP5M1	0.219481
GLIPR1	0.219481
FNTA	0.219481
PPP2CB	0.219481
SNX27	0.219481
CD56dim_prop	0.219481
PRSS1	0.218182
LYN	0.218182
VDAC1	0.218182
GDI1	0.218182
UBA7	0.218182
SMTN	0.218182
RAB4B	0.218182
FAM98A	0.218182
PPCDC	0.218182
AP2M1	0.216883
LRBA	0.216883
CHCHD3	0.216883
EIF3J	0.216883
AP2A2	0.216883
PFKL	0.216883
ME1	0.216883
LRRK1	0.216883
MOB2	0.216883
SFXN2	0.216883
C1orf43	0.216883
IGHG1	0.215584
PIP5K1C	0.215584
C8B	0.215584
NFKB1	0.215584
ERP29	0.215584
PCBP1	0.215584
FAM177A1	0.215584
NIPSNAP3B	0.215584
SEMA4B	0.215584
MRS2	0.214286
PHACTR2	0.214286
EPHX1	0.214286
NCF1	0.214286
ARSB	0.214286
C5AR1	0.214286
BCAT1	0.214286
YWHAE	0.214286
RAB11B	0.214286
SLC44A2	0.214286
GORASP1	0.214286
JAM3	0.214286
BLOC1S4	0.214286
ARFGEF1	0.214286
HLA-DRB3	0.212987
GALNT10	0.212987
POGLUT1	0.212987
NECTIN2	0.212987
GOLPH3	0.212987
TMEM165	0.212987
PGP	0.211688
TBCA	0.211688
CSDE1	0.211688
VCL	0.211688
ACTG2	0.211688
RAB31	0.211688
YOD1	0.211688
LPCAT3	0.211688
ATP6V1H	0.211688
TXNRD2	0.21039
WDR26	0.21039
PTPN7	0.21039
PDE6D	0.21039
UMPS	0.21039
CASP1	0.21039
SHMT1	0.21039
SEMA4A	0.21039
CALCOCO1	0.21039
MARF1	0.209091
PTGS1	0.209091
KIF5B	0.209091
PPP2R2A	0.209091
EIF2B1	0.209091
HSD17B12	0.209091
GEMIN5	0.209091
DNAH1	0.209091
KIDINS220	0.207792
CTSS	0.207792
BNIP2	0.207792
TLR2	0.207792
ALDH2	0.207792
PRDX5	0.207792
ADSS2	0.207792
SLC29A1	0.207792
GTPBP2	0.207792
YTHDC2	0.207792
VSIR	0.207792
HSPA1B	0.206494
FMO5	0.206494
PRPSAP1	0.206494
HSP90AB3P	0.206494
IER3IP1	0.205195
ELP4	0.205195
RGS10	0.205195
BAG2	0.205195
MNDA	0.205195
NUMB	0.205195
DRG2	0.205195
PSMC1	0.205195
COMMD1	0.205195
CPPED1	0.205195
NLN	0.205195
RAB21	0.205195
TBC1D22A	0.203896
ATP6V1B2	0.203896
CCT4	0.203896
LGALSL	0.203896
FKBP15	0.203896
STXBP5	0.203896
MAVS	0.203896
IRS2	0.203896
CLASRP	0.202597
GOLGA2	0.202597
COPS8	0.202597
SLC16A7	0.202597
NMRAL1	0.202597
NCK2	0.202597
TADA3	0.202597
VCAN	0.202597
ARL8A	0.202597
PLXNA4	0.202597
HMGB3	0.201299
RTCA	0.201299
COL6A3	0.201299
CSRP1	0.201299
FKBP1B	0.201299
RETREG3	0.201299
TRPM4	0.201299
RAB37	0.201299
CARD6	0.201299
TSC1	0.2
CLIC1	0.2
TOR1B	0.2
KIAA0513	0.2
FCGR1A	0.2
TKT	0.2
TRIM25	0.2
COA6	0.2
TTC1	0.2
ATP2A1	0.198701
NCF2	0.198701
AZGP1	0.198701
TIMM21	0.198701
GP6	0.198701
DPP3	0.198701
UBQLN1	0.198701
RBM38	0.197403
FGD4	0.197403
GMFG	0.197403
CR1	0.197403
EIF5A	0.197403
REL	0.197403
TXNDC17	0.197403
UACA	0.197403
HEBP1	0.197403
BMP2K	0.197403
TIMM13	0.197403
RCAN2	0.196104
PPP3R1	0.196104
MBP	0.196104
AGPS	0.196104
RIPK2	0.196104
ZMPSTE24	0.196104
ERLIN2	0.196104
SLFN14	0.196104
WDFY4	0.196104
YIPF6	0.196104
MMAB	0.196104
RARRES2	0.196104
ACAD9	0.196104
IVNS1ABP	0.196104
BPI	0.194805
TBC1D20	0.194805
REXO2	0.194805
KMO	0.194805
COL6A1	0.194805
IMPDH1	0.194805
KDELR2	0.194805
RAC1	0.194805
VANGL1	0.194805
SMN2	0.193506
SEC23A	0.193506
PSMD9	0.193506
MGST1	0.193506
WAS	0.193506
GRK6	0.193506
ALDH3B1	0.193506
TMF1	0.193506
TBXAS1	0.193506
RHBDF2	0.193506
SLC12A9	0.193506
PADI4	0.193506
PWP1	0.192208
CALR	0.192208
TOR1A	0.192208
CKB	0.192208
CETN2	0.192208
ELP6	0.192208
SURF1	0.192208
NSDHL	0.192208
TMT1A	0.192208
GLTP	0.192208
PIN4	0.192208
IVD	0.190909
CSTB	0.190909
CXCL3	0.190909
COX5A	0.190909
CCT3	0.190909
FGL2	0.190909
ARHGAP15	0.190909
PLPP6	0.190909
CXorf38	0.190909
PGAM5	0.190909
HYPK	0.190909
TNXB	0.18961
SLC43A3	0.18961
PGRMC2	0.18961
POR	0.18961
ARF4	0.18961
FLCN	0.18961
ABHD11	0.18961
CSNK1G1	0.188312
CPM	0.188312
CFL1	0.188312
PDIA3	0.188312
RAB10	0.188312
GANAB	0.188312
GAPVD1	0.188312
GCC2	0.188312
FBXW5	0.188312
CPB2	0.188312
GLIPR2	0.188312
HMBS	0.187013
TGOLN2	0.187013
ITIH4	0.187013
ESD	0.187013
SRM	0.187013
PSMB4	0.187013
RAB13	0.187013
TARBP1	0.187013
SEPTIN2	0.187013
EFL1	0.187013
XPNPEP1	0.187013
COMMD7	0.185714
STX7	0.185714
MAT2A	0.185714
PCBP2	0.185714
EPM2AIP1	0.185714
RAB6B	0.185714
NSFL1C	0.185714
NAA50	0.184416
MTSS1	0.184416
TUBB4A	0.184416
CLTB	0.184416
RRAS	0.184416
CYBA	0.184416
PRKACA	0.184416
USP8	0.184416
NEDD8	0.184416
ZFYVE27	0.184416
OLFM4	0.184416
NPEPL1	0.184416
SORT1	0.184416
ACP3	0.183117
INPP5B	0.183117
MANEA	0.183117
CRELD2	0.183117
TMED9	0.183117
IFT25	0.183117
IKBKB	0.181818
PRKD3	0.181818
DDAH2	0.181818
ICAM1	0.181818
C8G	0.181818
AHCY	0.181818
ALDH4A1	0.181818
YARS1	0.181818
CASP6	0.181818
NCF4	0.181818
STEAP3	0.181818
MOB3C	0.181818
MYDGF	0.181818
ESAM	0.181818
SDCBP	0.180519
WBP2	0.180519
APAF1	0.180519
LAMA5	0.180519
AZU1	0.180519
MRPL49	0.180519
PFDN5	0.180519
SPHK1	0.180519
NK_prop	0.179279
SNRPGP15	0.179221
SIL1	0.179221
AKAP10	0.179221
H6PD	0.179221
MVD	0.179221
LAMB2	0.179221
HBA1	0.179221
PRKAA1	0.179221
BANK1	0.179221
ITCH	0.179221
SNX18	0.179221
HINT2	0.179221
SIGLEC7	0.179221
PSMC3	0.179221
MAGT1	0.177922
MRPL45	0.177922
CCM2	0.177922
ACTR6	0.177922
FGR	0.177922
WARS1	0.177922
RPS6KB1	0.177922
SNX30	0.177922
PRAM1	0.177922
POLR3F	0.177922
DOP1B	0.177922
PLA2G12A	0.176623
PTGES3L-AARSD1	0.176623
NDUFS7	0.176623
ANXA3	0.176623
ARRB2	0.176623
GUCY1A1	0.176623
MBOAT2	0.176623
ZC3HAV1	0.176623
PELO	0.176623
FCN1	0.175325
CFAP410	0.175325
AP2A1	0.175325
WASHC5	0.175325
H2BC20P	0.175325
TTC9	0.175325
ISOC1	0.175325
TIGAR	0.175325
IGHV4-61	0.174026
WNK1	0.174026
PDXK	0.174026
CLU	0.174026
CCDC25	0.174026
GPX4	0.172727
ADAMTSL2	0.172727
SPAG9	0.172727
FYN	0.172727
ITGB5	0.172727
TRIP4	0.172727
HDHD2	0.172727
HDAC6	0.172727
LDHB	0.171429
PLSCR1	0.171429
MTCH1	0.171429
VPS4B	0.171429
SERPINE2	0.171429
GP1BB	0.171429
CASP2	0.171429
ERMP1	0.171429
ASCC3	0.171429
C7orf25	0.171429
SERPING1	0.17013
CTSZ	0.17013
KLC1	0.17013
HSP90AB1	0.17013
GSTM1	0.17013
YWHAG	0.17013
VAT1	0.17013
EPN1	0.17013
MTMR2	0.168831
IMPDH2	0.168831
GALNT4	0.168831
HIP1	0.168831
FAAH	0.168831
ARL2	0.168831
PSMD7	0.168831
TRAPPC11	0.168831
MADD	0.168831
OMA1	0.168831
NRBF2	0.168831
XYLT2	0.168831
EHD4	0.168831
KIF1B	0.167532
IRAG2	0.167532
SLC33A1	0.167532
COX4I1	0.167532
OSBP	0.167532
MPI	0.167532
PPAT	0.167532
EHD1	0.167532
EMC7	0.167532
DAPP1	0.167532
STAT2	0.166234
SNX9	0.166234
FURIN	0.166234
FBXO3	0.166234
UCHL3	0.166234
TNFAIP2	0.166234
BTK	0.166234
GALM	0.166234
INPP5K	0.166234
TAPBPL	0.166234
CYCS	0.164935
SNX4	0.164935
ACP1	0.164935
MAOB	0.164935
PEX3	0.164935
IRF8	0.164935
TMEM128	0.164935
C16orf54	0.164935
CALHM5	0.164935
ITGB1BP2	0.164935
RNASE2	0.163636
MAX	0.163636
RBM3	0.163636
EHD3	0.163636
SWAP70	0.163636
RUSF1	0.162338
WDR1	0.162338
NIPSNAP2	0.162338
RNASEH2A	0.162338
PRKAR2B	0.162338
ACOX1	0.162338
ANKRD13A	0.162338
IRGQ	0.162338
OSBPL11	0.162338
ARL6	0.162338
SQOR	0.162338
STX16	0.161039
CA2	0.161039
UROD	0.161039
NEDD4	0.161039
RAB14	0.161039
MICAL3	0.161039
DIS3L2	0.161039
PLA2G15	0.161039
ERGIC1	0.161039
RCHY1	0.161039
PCYT2	0.161039
SCARB2	0.15974
GNPAT	0.15974
SLC25A5	0.15974
SKI	0.15974
ITIH1	0.15974
VAV2	0.15974
YWHAZ	0.15974
AFAP1	0.15974
NCKAP1	0.15974
DHRS7B	0.158442
CRYBG1	0.158442
KRIT1	0.158442
ATP6V0D1	0.158442
LRRC32	0.158442
PSME4	0.158442
ABCF1	0.158442
STAM	0.158442
GBA2	0.158442
NRBP2	0.158442
RAPGEF6	0.157143
SRGAP2	0.157143
PDCD5	0.157143
HAT1	0.157143
RAB11FIP3	0.157143
PTPN6	0.157143
EFEMP1	0.157143
NAXE	0.157143
DNAJC2	0.157143
DEGS1	0.155844
ATP5PF	0.155844
EIF2S3	0.155844
ST13	0.155844
CAPRIN1	0.155844
TDRP	0.155844
SH3GL1	0.155844
TTYH3	0.155844
TNIK	0.155844
NBEAL1	0.154545
RTN2	0.154545
MCF2L	0.154545
MAPK1	0.154545
LRP1	0.154545
DAG1	0.154545
ALDH16A1	0.154545
MYOF	0.154545
HLA-B	0.154545
GBF1	0.153247
CHPF2	0.153247
ARPC3	0.153247
C4B	0.153247
GALNT2	0.153247
TBCC	0.153247
ANKMY2	0.153247
ATP6V0A2	0.153247
TPK1	0.151948
ROCK2	0.151948
NADK	0.151948
SFT2D2	0.151948
DNASE1L1	0.151948
ETFDH	0.151948
ESYT1	0.151948
DPYSL2	0.150649
SUPT3H	0.150649
GLRX3	0.150649
MFN2	0.150649
GCLM	0.150649
MGAT2	0.150649
TFCP2	0.150649
PPP1R7	0.150649
RDH11	0.150649
APIP	0.150649
ARFGAP3	0.150649
CUL1	0.149351
NAP1L1	0.149351
PABPC1	0.149351
PSMB1	0.149351
PGGT1B	0.149351
EIF4H	0.149351
SAMD14	0.149351
ISOC2	0.149351
ANO10	0.149351
STK39	0.149351
ENOPH1	0.149351
XPO1	0.148052
TXN	0.148052
COX7C	0.148052
EPS15	0.148052
NOMO2	0.148052
CMC1	0.148052
OXR1	0.148052
NUDCD1	0.148052
AAK1	0.146753
RAN	0.146753
IL18	0.146753
PROSER2	0.146753
FKBP7	0.146753
MYCBP	0.145455
ZNG1E	0.145455
INPP5F	0.145455
TPCN1	0.145455
APEH	0.145455
PRDX6	0.145455
INPP1	0.145455
PSMB3	0.145455
CUX1	0.145455
MIA3	0.145455
TUT7	0.145455
EMB	0.145455
CCDC43	0.145455
PSMD1	0.145455
SIAE	0.145455
ACAD8	0.145455
CLIC4	0.145455
PSMA2	0.144156
MTRES1	0.144156
FAM162A	0.144156
VAMP5	0.144156
MDH1	0.144156
BCAP31	0.144156
PRKX	0.144156
RAB32	0.144156
FAM78A	0.144156
TRAPPC6B	0.144156
PPIL3	0.144156
OSBPL2	0.142857
SEPTIN11	0.142857
MYZAP	0.142857
NFKBIE	0.142857
DENND4B	0.142857
EIF2S1	0.142857
S100A6	0.142857
DNM2	0.142857
AIF1	0.142857
MANF	0.142857
PPP2CA	0.142857
CNST	0.142857
CPNE2	0.142857
PADI2	0.142857
GIT1	0.142857
KYAT1	0.141558
BLTP1	0.141558
TMEM222	0.141558
ICAM2	0.141558
PEX11B	0.141558
DCTD	0.141558
LGALS3BP	0.141558
LMAN2L	0.141558
CTNNB1	0.14026
SPAST	0.14026
EML2	0.14026
ENO2	0.14026
QDPR	0.14026
GK	0.14026
GFUS	0.14026
PKN1	0.14026
DDB1	0.14026
VRK2	0.14026
EHBP1	0.14026
TMBIM1	0.14026
NPTN	0.14026
PTPN9	0.138961
ELOC	0.138961
PGGHG	0.138961
CERS5	0.138961
PPIP5K2	0.138961
SNX2	0.138961
F12	0.138961
AMBP	0.138961
EIF2B2	0.138961
SIRPA	0.138961
SYTL3	0.138961
SPRYD7	0.138961
PIP4P2	0.138961
PRRC1	0.138961
AUP1	0.138961
IGHV3-66	0.137662
IGHA2	0.137662
DNM1	0.137662
BRI3BP	0.137662
FBLN5	0.137662
LDLR	0.137662
RALA	0.137662
SULT1A1	0.137662
GUCY1B1	0.137662
PPP2R5A	0.137662
KIAA0930	0.137662
CD109	0.137662
SRBD1	0.137662
P4HB	0.136364
DOK3	0.136364
SNX15	0.136364
COPB2	0.136364
SEPTIN4	0.136364
UBE2L6	0.136364
PMM2	0.136364
BLVRB	0.136364
MCM2	0.136364
RIPK1	0.136364
CARHSP1	0.136364
SDAD1	0.135065
HELZ	0.135065
C2CD2L	0.135065
GGT1	0.135065
CCT6A	0.135065
PIP4K2B	0.135065
LEMD2	0.135065
DIS3L	0.135065
STON1-GTF2A1L	0.133766
PLIN3	0.133766
ENDOD1	0.133766
CD99	0.133766
GPD2	0.133766
ATP7A	0.133766
IQGAP2	0.133766
FAM174A	0.133766
LAMTOR3	0.133766
PPFIA1	0.132468
AGTPBP1	0.132468
SIRPB1	0.132468
PFKFB2	0.132468
GRK3	0.132468
PLAUR	0.132468
PSMD6	0.132468
CCT7	0.132468
PI4K2A	0.132468
MTMR12	0.132468
PI4KB	0.131169
NEDD4L	0.131169
PDGFA	0.131169
AP1G1	0.131169
PLXNC1	0.131169
GP5	0.131169
MDH2	0.131169
GNG10	0.131169
ARHGDIA	0.131169
ABCE1	0.131169
COASY	0.131169
SNX1	0.131169
LPCAT2	0.131169
NIBAN2	0.131169
ADISSP	0.131169
TRIOBP	0.131169
SCPEP1	0.131169
COMMD3	0.131169
CFL2	0.131169
AP4S1	0.131169
DMXL2	0.12987
C8A	0.12987
ACAA1	0.12987
GM2A	0.12987
PHKA2	0.12987
SEC24C	0.12987
PTEN	0.12987
GIPC3	0.12987
CUL5	0.12987
FUT8	0.12987
GHITM	0.12987
HPSE	0.12987
TNFSF13B	0.12987
TELO2	0.12987
TEX264	0.12987
CAD	0.128571
SEC24D	0.128571
TOMM40	0.128571
ATP6V1C1	0.128571
GSTT1	0.128571
NAA10	0.128571
SIGLEC14	0.128571
NME3	0.128571
UQCC1	0.128571
PRPSAP2	0.127273
USP12	0.127273
CSF2RA	0.127273
ST6GAL1	0.127273
AGL	0.127273
C4orf33	0.127273
NHEJ1	0.127273
BZW2	0.125974
KXD1	0.125974
MEFV	0.125974
LTN1	0.125974
ITGAM	0.125974
CYP4F3	0.125974
ATAD3B	0.125974
FBXO38	0.125974
SH3BP5L	0.125974
TM9SF2	0.125974
PPA2	0.125974
MGAT4B	0.125974
SEC23IP	0.125974
PRKACB	0.124675
ATP2C1	0.124675
GRSF1	0.124675
NR3C1	0.124675
IGKV1-16	0.124675
PRPS2	0.124675
PTPRA	0.124675
SERPINB10	0.124675
ADK	0.124675
PPP1CB	0.124675
HBB	0.124675
DENND4C	0.124675
TOM1L2	0.124675
RASGRP2	0.124675
AP4E1	0.124675
DUS4L-BCAP29	0.123377
THAP12	0.123377
BST1	0.123377
OTUB1	0.123377
CTDSPL	0.123377
CHMP2A	0.123377
APOL3	0.123377
CLPTM1	0.123377
PLA2G4A	0.123377
LIMS1	0.123377
RNF123	0.123377
TOMM5	0.123377
BTF3L4	0.123377
MFF	0.123377
FH	0.122078
GSTM4	0.122078
VPS13D	0.122078
SLC66A2	0.122078
DAGLB	0.122078
ALG11	0.120779
DENND4A	0.120779
NRAS	0.120779
HEXB	0.120779
CTSA	0.120779
TNFAIP3	0.120779
CHM	0.120779
SEC11A	0.120779
UBE2V2	0.120779
NT5DC1	0.120779
SUSD1	0.120779
EMC1	0.120779
SVIP	0.120779
PEX16	0.120779
DIAPH1	0.119481
REEP4	0.119481
B3GAT3	0.119481
DNPH1	0.119481
NFATC2IP	0.119481
RECK	0.119481
AKR1B1	0.119481
CD82	0.119481
SSBP1	0.119481
C3orf38	0.119481
LZTR1	0.119481
SCCPDH	0.119481
CHMP4B	0.119481
TRAF6	0.119481
EMILIN1	0.119481
VKORC1L1	0.118182
MFSD1	0.118182
YIPF3	0.118182
MSRB3	0.118182
VIPAS39	0.118182
ITIH2	0.118182
TYMP	0.118182
NT5E	0.118182
FGD2	0.118182
PLD3	0.118182
SPART	0.118182
ITFG1	0.118182
GOLT1B	0.118182
AMT	0.116883
CNN2	0.116883
SHKBP1	0.116883
PECAM1	0.116883
TXLNA	0.116883
FCGRT	0.116883
GLO1	0.116883
TRIM26	0.116883
LMBRD2	0.116883
DYM	0.116883
APBB1IP	0.116883
ERO1A	0.116883
INPP4A	0.116883
AASDHPPT	0.116883
PA2G4	0.116883
PXN	0.115584
BRAF	0.115584
CCNT1	0.115584
ZFPL1	0.115584
MIF	0.115584
RAB5B	0.115584
S100A12	0.115584
CC2D1A	0.115584
CYTH2	0.114286
CD47	0.114286
COCH	0.114286
MPRIP	0.114286
GABARAP	0.114286
LRPAP1	0.114286
VAMP7	0.114286
HDGF	0.114286
ARF6	0.114286
YWHAH	0.114286
RAB30	0.114286
SLC9A9	0.114286
RILPL2	0.114286
LGALS12	0.114286
PLAA	0.114286
CUL9	0.112987
ERI3	0.112987
CFP	0.112987
SLC7A1	0.112987
ATAD1	0.112987
AGPAT1	0.112987
CLN6	0.112987
AGO2	0.112987
DSE	0.112987
LSM4	0.112987
LILRB2	0.111688
SELENOP	0.111688
SNCA	0.111688
PDPK1	0.111688
PXMP2	0.111688
CFH	0.111688
YBX1	0.111688
FKBP5	0.111688
ARHGAP45	0.111688
MRPL53	0.111688
ATP8A1	0.111688
AKAP13	0.11039
FCHO1	0.11039
PTTG1IP	0.11039
RASA1	0.11039
ND1	0.11039
RALB	0.11039
KRT5	0.11039
MAPKAPK2	0.11039
ARSD	0.11039
HSDL2	0.11039
TTC39C	0.11039
CSGALNACT2	0.11039
KATNB1	0.11039
NLRC4	0.11039
PABPC4	0.109091
PTGR1	0.109091
PDXDC1	0.109091
P4HA1	0.109091
VEGFC	0.109091
P2RX1	0.109091
SEC13	0.109091
LZIC	0.109091
MRPL15	0.109091
WASHC4	0.107792
TMEM87B	0.107792
RIPOR3	0.107792
UBA5	0.107792
ZFYVE1	0.107792
FEZ2	0.107792
GPAA1	0.107792
SERPINB1	0.107792
FAM136A	0.107792
MAPKAP1	0.107792
VPS33B	0.107792
FGFR1OP2	0.107792
COA3	0.107792
Treg_count	0.107792
TEX2	0.106494
TTLL12	0.106494
ULK3	0.106494
USP32	0.106494
SEPHS2	0.106494
TPD52L2	0.105195
RHOQ	0.105195
FLNA	0.105195
PTX3	0.105195
GMPS	0.105195
TMSB10	0.105195
LMF2	0.105195
VPS29	0.105195
PIKFYVE	0.105195
BIRC2	0.103896
AKR1C3	0.103896
ELOVL5	0.103896
IMPACT	0.103896
RAB12	0.103896
MCEMP1	0.103896
RER1	0.103896
ITGA2B	0.103896
SLC11A1	0.103896
TTC39B	0.103896
DNAJC19	0.103896
EIF2B3	0.103896
UFSP2	0.103896
PRNP	0.102597
OPHN1	0.102597
RPA2	0.102597
SELP	0.102597
HSPA4	0.102597
HNMT	0.102597
ECH1	0.102597
RBPMS2	0.102597
DHRSX	0.102597
UNC93B1	0.102597
ACP6	0.102597
WDR7	0.102597
STAT6	0.101299
PPM1B	0.101299
AAMP	0.101299
GCA	0.101299
STX11	0.101299
ELANE	0.101299
SLC6A4	0.101299
MCM5	0.101299
IGFBP7	0.101299
SCYL2	0.101299
ABHD5	0.101299
PTP4A1	0.101299
CHORDC1	0.101299
CDC42BPB	0.101299
DERL1	0.1
PTGR2	0.1
DCTN3	0.1
PSMA4	0.1
HCCS	0.1
ITPA	0.1
NIBAN1	0.1
ABRACL	0.1
FBXO40	0.1
BGN	0.0987013
RAP1A	0.0987013
DCAF8	0.0987013
PIP4P1	0.0987013
TMEM104	0.0987013
DDB2	0.0987013
ATP6V0A1	0.0987013
QTRT1	0.0987013
SLAIN2	0.0987013
CYB5R1	0.0987013
CDK16	0.0974026
NLE1	0.0974026
CSNK2A1	0.0974026
CFHR2	0.0974026
PLEK	0.0974026
RAB8A	0.0974026
COPS2	0.0974026
KCNA1	0.0974026
TOMM34	0.0974026
SMAD1	0.0974026
CLEC12A	0.0974026
ABHD17B	0.0974026
RNF170	0.0974026
PITPNC1	0.0961039
MPDU1	0.0961039
IGHV3-9	0.0961039
CD14	0.0961039
GBP1	0.0961039
NUDT2	0.0961039
MAP4K2	0.0961039
PCOLCE	0.0961039
ERO1B	0.0961039
HDDC3	0.0961039
MAP3K5	0.0961039
IDE	0.0948052
GPS1	0.0948052
KIF3C	0.0948052
PSMA7	0.0948052
MAP3K7	0.0948052
ERN1	0.0948052
BPNT1	0.0948052
MSN	0.0948052
INPP5A	0.0948052
FAM89B	0.0948052
MRPL44	0.0948052
MCM4	0.0935065
TACC1	0.0935065
DOK2	0.0935065
N4BP1	0.0935065
CAVIN2	0.0935065
GNS	0.0935065
LYZ	0.0935065
SPP2	0.0935065
FERMT2	0.0935065
COPS7B	0.0935065
VAPA	0.0935065
STK38L	0.0935065
DAD1	0.0922078
ABCC4	0.0922078
EEF1E1	0.0922078
RNF13	0.0922078
HSPA5	0.0922078
NID1	0.0922078
CAPN2	0.0922078
GMFB	0.0922078
HSPH1	0.0922078
COPS5	0.0922078
SIGMAR1	0.0922078
EPG5	0.0922078
UBP1	0.0922078
RCC2	0.0922078
ASAP1	0.0909091
LIMK1	0.0909091
FOXO3	0.0909091
ALOX12	0.0909091
GSK3A	0.0909091
DEFA3	0.0909091
FASTKD5	0.0909091
HACE1	0.0909091
ABHD12	0.0909091
DTD2	0.0909091
RRAGC	0.0909091
ABR	0.0896104
ACVR1	0.0896104
RPA1	0.0896104
TEC	0.0896104
CARM1	0.0896104
GBP4	0.0896104
MAT2B	0.0896104
CDC42BPA	0.0883117
SPCS1	0.0883117
DAZAP1	0.0883117
GRK4	0.0883117
GSK3B	0.0883117
OCRL	0.0883117
CKAP5	0.0883117
FHL2	0.0883117
TSR1	0.0883117
EMC4	0.0883117
PAOX	0.0883117
MRPL55	0.0883117
RNF169	0.0883117
SELENOT	0.087013
TPM2	0.087013
TMEM50A	0.087013
PRDX2	0.087013
HSD17B7	0.087013
UBE2I	0.087013
PLD1	0.087013
ACTBL2	0.087013
TMEM63B	0.087013
LRRC25	0.087013
DNAAF10	0.087013
MRPS26	0.087013
SUGT1	0.087013
ADSL	0.0857143
DDX19A	0.0857143
ATP5PD	0.0857143
AHSA1	0.0857143
LY6G6F	0.0857143
SH3PXD2A	0.0857143
UPF1	0.0857143
METTL26	0.0857143
TIMM10B	0.0857143
TRIM3	0.0844156
PIK3C3	0.0844156
SPECC1	0.0844156
BCL2L1	0.0844156
LSM1	0.0844156
TPST2	0.0844156
TRIM21	0.0844156
TCIRG1	0.0844156
CCT6B	0.0844156
GNB4	0.0844156
CD274	0.0844156
DBNL	0.0844156
HLA-C	0.0831169
PHGDH	0.0831169
BIN1	0.0831169
CNP	0.0831169
ACO1	0.0831169
ARL1	0.0831169
ASPSCR1	0.0831169
UBE2O	0.0831169
DPEP2	0.0831169
RAB9B	0.0831169
NCDN	0.0831169
LIMD1	0.0831169
AP4B1	0.0831169
RIPOR2	0.0818182
ECE1	0.0818182
GATM	0.0818182
MRPL35	0.0818182
HTRA2	0.0818182
S100A8	0.0818182
SLC2A1	0.0818182
RAB5C	0.0818182
COG7	0.0818182
VAC14	0.0818182
FGD3	0.0818182
SNF8	0.0818182
SLC9A6	0.0805195
TPM3	0.0805195
SEC22A	0.0805195
SOS1	0.0805195
UBFD1	0.0805195
CAPN1	0.0805195
GALT	0.0805195
CES1	0.0805195
HSP90AA4P	0.0805195
TRAPPC14	0.0805195
MRPS24	0.0805195
PARK7	0.0805195
PYM1	0.0805195
TFG	0.0792208
ELMOD2	0.0792208
NFE2	0.0792208
MAN2B1	0.0792208
[truncated: 4,065 more rows]

## Sheet: Ridge regression
Iteration	ABCB7	ABCB8	ABHD4	ACOT7	ACOX3	ACSBG1	ACSL1	ACSL4	ACSS2	ACTN1	ACTN4	ADPRH	AGFG1	AGK	AKR7A2	ALDH1A1	ALDOA	APBA2	ARAP1	ARFGAP2	ARMC1	ARPC5	ASCC2	ASNS	ASRGL1	ATP6V1D	B3GNT2	BDH1	BLMH	BLVRA	BTN3A2	BTN3A3	C11orf54	C1QC	C3P1	CAMP	CARD8	CARD9	CASP3	CBL	CD3D	CD56bright count	CD8 count	CD8A	CDK19	CEP135	CETP	CISD3	CMPK2
0	-0.0801117	-0.00812298	0.201099	0.0118832	0.0204412	0.0502547	0.0468458	-0.0556025	-0.000190829	-0.152301	-0.0418281	0.0571086	0.0309768	0.027166	-0.0252569	0.102942	-0.0522714	0.162735	-0.0423325	-0.0543119	-0.0226657	0.0182166	-0.108603	0.128363	0.10894	0.0899964	0.0254238	-0.115359	-0.0354128	-0.00496957	-0.0981589	-0.0500635	0.0690521	-0.240209	0.177009	0.0131363	-0.187467	0.120513	0.0326675	0.130956	0.0279316	-0.169844	-0.132194	-0.137648	-0.0950047	-0.0358213	0.0893069	-0.109386	0.0285368
1	-0.059002	-0.0170926	0.168281	0.0602416	-6.45944e-05	0.0889877	0.065472	-0.0133576	-0.00126339	-0.183455	-0.086765	0.126634	-0.0369376	0.0522992	-0.0614896	0.0887205	-0.0365316	0.10078	-0.0157695	-0.0608925	-0.0323392	-0.00480534	-0.107053	0.090962	0.131042	0.0974832	0.00519605	-0.00538317	-0.0303013	-0.0171722	-0.112464	-0.0811852	0.0379916	-0.232273	0.11887	-0.0549321	-0.151318	0.131543	0.0124686	0.0668751	0.00256911	-0.107985	-0.103146	-0.13616	-0.0957969	-0.0418684	0.00711701	-0.07054	0.00929848
2	-0.0872068	-0.00830704	0.149142	0.02493	0.0117401	0.0469315	0.0816135	-0.0587359	-0.00809986	-0.133086	-0.00568734	0.080965	0.041438	0.0409103	-0.0575021	0.114719	-0.0422889	0.0521359	-0.0253208	-0.0167862	-0.0308147	0.0138322	-0.0737362	0.0684142	0.119845	0.0930962	-0.00485394	-0.0858233	-0.0194482	-0.0361472	-0.0887936	-0.0663048	0.043755	-0.235488	0.161638	-0.0187946	-0.149222	0.130903	0.0013433	0.116555	0.0325604	-0.105375	-0.148127	-0.132306	-0.0794568	-0.0698931	0.032878	-0.0483769	0.0377275
3	-0.0847462	-0.0111731	0.204892	0.0121106	0.0265887	0.0370989	0.0420913	-0.0570739	0.00105757	-0.150768	-0.0378096	0.0454705	0.0332088	0.0223386	-0.0299599	0.0999319	-0.0503708	0.167181	-0.0463693	-0.0559698	-0.0217486	0.0155971	-0.112377	0.135144	0.110809	0.0895227	0.0181235	-0.127481	-0.0355257	0.00280967	-0.0992434	-0.0441388	0.066641	-0.229448	0.171147	0.0169426	-0.179613	0.113161	0.0246259	0.122104	0.0201754	-0.174504	-0.132097	-0.144554	-0.0914788	-0.0305696	0.0911889	-0.117811	0.040934
4	-0.0775642	-0.00634509	0.20056	0.00999463	0.0213359	0.0472868	0.0485372	-0.0533814	0.00116492	-0.157072	-0.0432478	0.0535488	0.028463	0.0282484	-0.0264645	0.106576	-0.053712	0.165693	-0.0413515	-0.055441	-0.0218654	0.0191202	-0.10831	0.13555	0.113368	0.090885	0.0248885	-0.113324	-0.0372973	-0.00451075	-0.0985858	-0.0511225	0.0682061	-0.237031	0.16737	0.0151939	-0.189538	0.124444	0.0310218	0.12967	0.026288	-0.169468	-0.130998	-0.138175	-0.0925387	-0.0285458	0.0883816	-0.109421	0.0297635
5	-0.0748014	-0.0105554	0.187558	0.0138913	0.0253755	0.040124	0.0610025	-0.0572608	-0.00594685	-0.155631	-0.0367624	0.0600513	0.0254684	0.0285899	-0.0202409	0.116644	-0.0571449	0.164363	-0.0284821	-0.0487693	-0.0189063	0.0264466	-0.117935	0.136783	0.112005	0.0933171	0.0237515	-0.1118	-0.0280051	-0.00103469	-0.102822	-0.0547406	0.0587897	-0.233166	0.162002	0.0197191	-0.193922	0.130681	0.0218672	0.13595	0.0170722	-0.190632	-0.137193	-0.136851	-0.0766588	-0.0346478	0.081798	-0.114434	0.027423
6	-0.0201663	0.0101731	0.182601	-0.000128536	-0.00799212	0.0538657	0.0488378	-0.0813176	0.0249001	-0.129172	-0.045334	0.0609541	0.039662	0.0508225	-0.0278747	0.123483	-0.0484246	0.120352	-0.0368706	-0.0295736	-0.0663232	0.0306726	-0.0885556	0.125666	0.0657528	0.104375	0.075182	-0.104602	-0.0384676	-0.00259677	-0.11169	-0.0282502	0.0654322	-0.226007	0.136991	0.0427012	-0.0577668	0.0940697	0.0501243	0.161005	0.0693755	-0.148436	-0.0723157	-0.0595158	-0.102392	-0.00956876	0.125659	-0.112181	-0.0203969
7	-0.0557988	-0.00259283	0.195052	0.0142917	0.040688	0.0269995	0.0479125	-0.0407127	0.0275269	-0.137906	-0.0335528	0.0287093	0.047604	0.0306653	-0.0509587	0.119312	-0.0474713	0.180702	-0.058081	-0.0452634	-0.0196607	0.0158279	-0.0929236	0.103418	0.101718	0.091821	0.0417979	-0.108316	-0.018158	-0.00833472	-0.0803266	-0.0621242	0.0727056	-0.249511	0.162137	0.00741693	-0.194869	0.113622	0.0377644	0.153663	0.0350745	-0.164003	-0.143707	-0.134713	-0.0784191	-0.0216923	0.0955776	-0.105635	0.0430331
8	-0.0788096	-0.00488168	0.206071	0.0114983	0.0206531	0.0503007	0.0529816	-0.0544301	-0.00210188	-0.159313	-0.0453621	0.0571544	0.0286745	0.0299334	-0.0263827	0.105012	-0.0545317	0.164912	-0.0366094	-0.0575863	-0.0202175	0.0191	-0.107884	0.129929	0.113676	0.0909769	0.0265598	-0.115195	-0.0334509	-0.00818464	-0.0960535	-0.0493902	0.065291	-0.236444	0.171325	0.0113927	-0.188914	0.123577	0.0289449	0.134311	0.025383	-0.166475	-0.132863	-0.135845	-0.0866218	-0.0349525	0.0822037	-0.112753	0.0283547
9	-0.0818947	-0.0094958	0.190856	0.0132827	0.0260396	0.0431167	0.0418017	-0.0586821	6.75216e-06	-0.158737	-0.0448229	0.0566683	0.0276741	0.0237702	-0.01731	0.105516	-0.0515763	0.171395	-0.0438495	-0.0575871	-0.0185434	0.0207984	-0.118785	0.135771	0.11079	0.0959622	0.0241185	-0.116335	-0.038152	-0.00219948	-0.104447	-0.0473094	0.0670078	-0.243037	0.175796	0.0127083	-0.189148	0.113483	0.0323817	0.127877	0.0283944	-0.182786	-0.120599	-0.134343	-0.0936644	-0.0325307	0.0970867	-0.114898	0.0274174
10	-0.0758612	-0.00802232	0.203927	0.00936864	0.0202259	0.0505054	0.047654	-0.0542569	-0.0015099	-0.155218	-0.0435343	0.0542447	0.0288623	0.0289416	-0.0271743	0.101213	-0.055217	0.165373	-0.0401954	-0.0529673	-0.021766	0.0156773	-0.108046	0.13737	0.108549	0.089464	0.0265649	-0.113028	-0.037457	-0.000192313	-0.0985512	-0.0501546	0.0672677	-0.235327	0.171849	0.0151982	-0.188642	0.125561	0.0300125	0.126882	0.0245518	-0.173488	-0.132618	-0.13766	-0.092111	-0.0307189	0.0887882	-0.110429	0.029799
11	-0.0949221	-0.00438149	0.188009	0.00756683	0.0239858	0.0553628	0.0460785	-0.0539248	-0.000319446	-0.146588	-0.0336793	0.0448763	0.0367474	0.0288573	-0.015536	0.0952558	-0.057863	0.163604	-0.0509124	-0.0632154	-0.0166663	0.0175527	-0.117816	0.14826	0.0932176	0.0893496	0.0161338	-0.120333	-0.046143	0.00409426	-0.115063	-0.0685521	0.0760778	-0.228469	0.160295	0.0114551	-0.186028	0.121181	0.0282543	0.133309	0.0179561	-0.176237	-0.152003	-0.149095	-0.0953987	-0.0336013	0.0877415	-0.108979	0.0313382
12	-0.0966985	0.00973198	0.170168	0.00306244	-0.0132168	0.0233678	0.0356372	-0.054296	0.000300655	-0.15333	-0.0457722	0.0450844	0.0230945	0.0240804	0.00428757	0.134118	-0.0499108	0.144888	-0.0075151	-0.0266167	0.00205241	0.0357201	-0.113557	0.170111	0.122314	0.132982	0.0229492	-0.107995	-0.0492048	0.0543585	-0.147355	-0.0593212	0.106985	-0.162461	0.10366	0.00716775	-0.153796	0.16176	0.0322926	0.0929317	-0.0177935	-0.151241	-0.142598	-0.129595	-0.0742676	-0.0144048	0.0936928	-0.106151	0.012685
13	-0.0785975	-0.00670269	0.225044	0.000660449	0.0436997	0.0560961	0.0517847	-0.0266163	0.0205904	-0.178231	-0.0721164	0.014626	0.0639634	0.0283403	-0.0265765	0.0814189	-0.0532352	0.166982	-0.0383881	-0.0465634	-0.0233961	-0.0216419	-0.0917595	0.151112	0.0977657	0.0900565	0.0554684	-0.120395	-0.0326322	0.0121009	-0.109469	-0.0745348	0.0746379	-0.233213	0.171756	-0.00501555	-0.181253	0.111413	0.0230023	0.129632	0.0109745	-0.148752	-0.125264	-0.120424	-0.078333	-0.0387525	0.0870303	-0.109216	0.0301985
14	-0.0937135	0.0169999	0.179083	0.0188906	0.0644315	0.0952904	0.0570007	-0.0325216	0.0432355	-0.117441	-0.0211849	0.0500563	0.0687685	0.0315633	0.00696806	0.0407012	-0.0353645	0.163083	-0.058628	-0.0802256	0.012145	0.0405122	-0.108241	0.165911	0.0747674	0.10337	0.018178	-0.118179	-0.0343038	-0.00385716	-0.0669774	-0.0496892	0.0482169	-0.222339	0.16508	0.0125626	-0.156366	0.0841683	0.0524532	0.127031	0.0164103	-0.189419	-0.152918	-0.162545	-0.0933467	-0.0318534	0.10461	-0.107535	0.0396774
15	-0.0556673	-0.0130496	0.205944	-0.0039137	0.0191062	0.0788898	0.018407	-0.0700582	-0.0414217	-0.14759	-0.0312736	0.0380015	0.0316878	0.0248068	-0.0364868	0.07722	-0.0581754	0.162904	-0.0417857	-0.0435537	-0.00546095	0.00416496	-0.0798141	0.115044	0.112369	0.0880375	0.0383269	-0.111524	-0.042964	0.000122237	-0.0591257	-0.0540449	0.0512143	-0.217871	0.191443	0.0228189	-0.227302	0.142856	0.0258012	0.116233	0.032461	-0.175899	-0.136895	-0.129674	-0.059615	-0.041711	0.0643512	-0.12572	0.0463572
16	-0.0821733	-0.0206832	0.203085	0.0161351	0.0405179	0.0527155	0.0427576	-0.0498908	-0.013363	-0.170926	-0.0530958	0.0443557	0.0257229	0.015722	-0.0294435	0.0928708	-0.0467414	0.173175	-0.0487212	-0.0506184	-0.0218524	0.0128561	-0.123283	0.134593	0.104143	0.0928999	0.0202978	-0.123161	-0.0369562	0.0049067	-0.107328	-0.0532727	0.0705973	-0.224747	0.169993	0.00789387	-0.203255	0.126351	0.0220193	0.12377	0.0257231	-0.168238	-0.136803	-0.139679	-0.09134	-0.0270114	0.0954761	-0.115812	0.0209266
17	-0.0628688	-0.0065761	0.180582	-0.0119304	0.0622878	0.0244323	0.101459	-0.0141423	0.0329185	-0.136325	-0.0344767	0.0442874	0.0539449	-0.0169999	0.0418794	0.102415	-0.0436051	0.173023	-0.0310548	-0.0200342	-0.00780689	0.0209085	-0.130542	0.12191	0.0960262	0.0646166	-0.010832	-0.134328	-0.00316988	-0.0378687	-0.0287675	0.022696	0.0700274	-0.183525	0.183636	0.000294776	-0.235519	0.101669	0.065572	0.139999	0.019656	-0.157074	-0.11329	-0.12555	-0.129118	-0.0741668	0.153839	-0.0925392	0.0235717
18	-0.0548295	0.0310091	0.184762	-0.0447406	-0.0602153	0.0428385	0.0177391	-0.0754379	0.0237725	-0.0686813	-0.0112946	0.0348744	0.0130956	0.0246479	0.0235101	0.135549	-0.0706661	0.141451	-0.049054	-0.0709106	-0.0504069	0.0477391	-0.0779298	0.161911	0.126444	0.0615301	0.0540184	-0.118302	-0.0417398	-0.021111	-0.108986	-0.0627081	0.062274	-0.231288	0.117844	0.139372	-0.128051	0.10087	0.0390624	0.126302	0.00182115	-0.168947	-0.117054	-0.0963064	-0.0882124	-0.0200955	0.0695249	-0.0927553	-0.0175055
19	-0.074913	-0.00703324	0.199878	0.00687258	0.0225709	0.0538732	0.0468392	-0.0527266	-0.000107748	-0.156948	-0.0426953	0.0565978	0.0297537	0.0298573	-0.0231969	0.105314	-0.0533871	0.161036	-0.0438102	-0.0564438	-0.0265267	0.0133101	-0.111238	0.129545	0.109795	0.0888246	0.0209627	-0.112834	-0.0356966	-0.00474396	-0.097069	-0.0481448	0.0686901	-0.229059	0.169629	0.0117109	-0.191362	0.12057	0.0337112	0.135987	0.0261906	-0.168989	-0.132556	-0.137855	-0.10033	-0.0335962	0.0826904	-0.112806	0.032005
20	-0.0764004	-0.0258009	0.202065	0.0154915	0.0292006	0.0350997	0.0620153	-0.0503737	-0.00528393	-0.161448	-0.045942	0.0391992	0.0342676	0.0141138	-0.0314536	0.0997061	-0.0541953	0.165797	-0.0320188	-0.0441488	-0.0303234	0.0119068	-0.100101	0.138838	0.109575	0.0717089	0.0286082	-0.120716	-0.0410625	-0.0114022	-0.0874699	-0.0546531	0.0613136	-0.245913	0.172152	0.0188345	-0.186486	0.124988	0.0227661	0.117491	0.0318596	-0.167025	-0.105181	-0.135943	-0.0874054	-0.0355711	0.104166	-0.111199	0.0370666
Mean	-0.0736546	-0.00490009	0.191841	0.00902186	0.0208286	0.0501637	0.0506889	-0.0507048	0.00456501	-0.148103	-0.0407732	0.0520699	0.0321972	0.0270797	-0.0217458	0.102316	-0.0510802	0.153884	-0.0389105	-0.0494038	-0.022052	0.0177863	-0.10469	0.131648	0.106805	0.0909655	0.0262316	-0.109734	-0.0340737	-0.00409206	-0.0961307	-0.0517623	0.0653416	-0.227468	0.16103	0.0146561	-0.177135	0.119875	0.0308646	0.126121	0.0226017	-0.163086	-0.128591	-0.131164	-0.0895957	-0.0343606	0.0868147	-0.10517	0.0256291
SD	0.0175284	0.0127552	0.0167255	0.0185116	0.0266177	0.0187115	0.0182749	0.0172674	0.0185962	0.023969	0.0174913	0.0218087	0.0207415	0.0136846	0.0244513	0.0205638	0.00776726	0.0297321	0.012579	0.0157528	0.0163193	0.0147598	0.015312	0.023731	0.0153546	0.0143778	0.01939	0.0257191	0.0102707	0.0182225	0.0237023	0.0204822	0.013886	0.0199052	0.0225822	0.0340625	0.0369809	0.0167701	0.0136829	0.0192751	0.0164929	0.0218965	0.0187649	0.0204479	0.0135386	0.0149732	0.0292267	0.0171998	0.0173664
[truncated: 211 more columns]
